# Supplementary material for: Comparative Evaluation of Large Language Models for Medical Education: Performance Analysis in Urinary System Histology.
Source: Research Square preprint supplement (doi:10.21203/rs.3.rs-6186253/v1), 2025-03-13
Supplement: Supplementary file 1 [file 2f58cf5611794ca49de49700.xlsx]

## Sheet: All Data
Question	Correct Answer	Claude 3.5-1	Claude 3.5-1 Comprehensiveness	Claude 3.5-1 Relevance	Claude 3.5-2	Claude 3.5-2 Comprehensiveness	Claude 3.5-2 Relevance	Claude 3.5-3	Claude 3.5-3 Comprehensiveness	Claude 3.5-3 Relevance	Claude 3.5-4	Claude 3.5-4 Comprehensiveness	Claude 3.5-4 Relevance	Claude 3.5-5	Claude 3.5-5 Comprehensiveness	Claude 3.5-5 Relevance	Claude 3.7-1	Claude 3.7-1 Comprehensiveness	Claude 3.7-1 Relevance	Claude 3.7-2	Claude 3.7-2 Comprehensiveness	Claude 3.7-2 Relevance	Claude 3.7-3	Claude 3.7-3 Comprehensiveness	Claude 3.7-3 Relevance	Claude 3.7-4	Claude 3.7-4 Comprehensiveness	Claude 3.7-4 Relevance	Claude 3.7-5	Claude 3.7-5 Comprehensiveness	Claude 3.7-5 Relevance	Claude 3.7-E-1	Claude 3.7-E-1 Comprehensiveness	Claude 3.7-E-1 Relevance	Claude 3.7-E-2	Claude 3.7-E-2 Comprehensiveness	Claude 3.7-E-2 Relevance	Claude 3.7-E-3	Claude 3.7-E-3 Comprehensiveness	Claude 3.7-E-3 Relevance	Claude 3.7-E-4	Claude 3.7-E-4 Comprehensiveness	Claude 3.7-E-4 Relevance	Claude 3.7-E-5	Claude 3.7-E-5 Comprehensiveness	Claude 3.7-E-5 Relevance	ChatGPT o1-1	ChatGPT o1-1 Comprehensiveness	ChatGPT o1-1 Relevance
1	D	B	2	2	B	1	2	B	1	2	B	1	2	B	1	2	D	2	2	C	2	1	D	2	2	C	1	1	D	2	2	D	2	2	D	2	2	D	2	2	D	2	2	D	2	2	D	2	1
2	C	B	1	2	B	1	1	B	1	2	B	1	1	B	1	1	B	1	2	B	2	2	B	1	2	B	1	1	B	2	2	B	2	2	B	2	2	B	2	2	B	2	2	B	2	2	C	2	2
3	D	D	1	2	D	2	2	D	2	1	D	2	2	D	2	2	D	2	2	D	2	2	D	2	2	D	2	2	D	2	2	D	2	2	D	2	2	D	2	2	D	2	2	D	2	2	D	2	2
4	C	C	2	2	B	1	2	C	2	2	C	2	2	C	2	2	C	2	2	C	1	2	C	2	2	C	2	1	C	2	2	C	2	2	C	2	2	C	2	2	C	2	2	C	2	2	C	2	2
5	A	A	2	2	A	2	2	A	1	2	A	1	2	A	1	2	A	1	2	A	2	2	A	2	2	A	2	2	A	1	2	A	2	2	A	2	2	A	2	2	A	2	2	A	2	2	A	2	2
6	B	B	2	2	B	2	2	B	2	2	B	1	1	B	2	2	B	2	2	B	2	2	B	2	2	B	2	2	B	2	2	B	2	2	B	2	2	B	2	1	B	2	2	B	2	2	B	2	2
7	B	B	2	2	B	2	2	B	1	2	B	1	2	B	1	2	B	2	2	B	2	2	B	2	2	B	2	2	B	2	2	B	2	2	B	2	2	B	2	2	B	2	2	B	2	2	B	2	2
8	C	C	1	2	C	1	2	C	1	2	C	2	2	C	2	2	C	1	2	C	2	2	C	2	2	C	2	2	C	2	2	C	2	2	C	2	2	C	2	2	C	2	2	C	2	2	C	2	2
9	C	C	2	2	C	2	2	C	1	2	C	1	2	C	2	2	C	2	2	C	2	2	C	2	2	C	2	2	C	2	2	C	2	2	C	2	2	C	2	2	C	2	2	C	2	2	C	2	2
11	A	A	2	2	A	2	2	A	2	1	A	1	2	A	2	2	A	2	2	A	2	1	A	2	2	A	2	2	A	2	2	A	2	2	A	2	2	A	1	2	A	1	2	A	2	2	A	2	2
11	C	C	1	1	C	2	2	C	2	2	C	2	1	C	1	2	C	2	2	C	2	2	C	2	2	C	1	2	C	2	2	C	2	2	C	2	2	C	2	2	C	2	2	C	2	2	C	1	1
12	B	B	2	2	B	1	2	B	1	2	B	2	1	B	2	2	B	1	2	B	2	2	B	2	2	B	2	2	B	2	2	B	2	2	B	2	2	B	2	2	B	2	2	B	2	2	B	2	2
13	B	B	2	2	B	2	2	B	1	2	B	2	2	B	2	2	B	2	2	B	2	2	B	2	2	B	1	2	B	2	2	B	2	2	B	2	1	B	2	2	B	2	2	B	2	2	B	2	2
14	E	C	1	2	C	1	2	C	1	2	C	2	2	C	1	1	A	2	2	C	1	1	A	1	2	A	1	1	A	2	2	E	2	2	C	2	1	A	2	1	B	2	2	E	2	2	E	2	2
15	D	D	2	2	D	2	2	D	2	1	D	2	2	D	2	2	D	2	2	D	2	2	D	2	2	D	2	2	D	2	2	D	2	2	D	2	2	D	2	2	D	2	2	D	2	2	D	2	2
16	B	B	2	2	B	1	2	B	2	2	B	2	2	B	2	1	B	2	2	B	2	2	B	2	2	B	2	2	B	2	2	B	2	2	B	2	2	B	2	2	B	2	2	B	2	2	B	2	2
17	E	E	2	2	E	2	2	E	2	2	E	2	2	E	2	2	E	2	2	E	1	2	E	2	2	E	1	2	E	2	2	E	2	2	E	2	2	E	2	1	E	2	2	E	2	2	E	2	2
18	B	B	2	2	B	2	2	B	2	2	B	2	2	B	2	2	B	2	2	B	2	2	B	2	2	B	1	2	B	2	2	B	2	2	B	2	2	B	1	2	B	2	2	B	2	2	B	2	2
19	C	C	1	2	C	1	2	C	2	2	C	1	2	C	2	2	C	2	2	C	2	2	C	2	2	C	2	2	C	2	2	C	2	2	C	2	2	C	2	2	C	2	2	C	2	2	C	2	1
21	B	B	2	2	B	1	2	B	2	2	B	2	2	B	2	2	B	2	2	B	2	2	B	2	2	B	2	2	B	2	2	B	2	2	B	2	2	B	2	2	B	2	2	B	2	2	B	1	1
21	B	B	2	2	B	2	2	B	2	1	B	2	2	B	2	2	B	2	2	B	2	2	B	2	2	B	2	2	B	2	2	B	2	2	B	2	2	B	2	2	B	2	2	B	2	2	B	2	2
22	B	B	1	2	B	2	2	B	2	2	B	2	2	B	2	2	B	2	2	B	2	2	B	2	2	B	2	2	B	2	2	B	2	2	B	2	2	B	2	2	B	2	2	B	2	2	B	2	2
23	B	B	2	1	B	1	2	B	1	2	B	2	2	B	2	2	B	2	2	B	2	2	B	2	2	B	2	2	B	2	2	B	2	2	B	2	2	B	2	2	B	2	2	B	2	2	B	2	2
24	C	C	1	2	C	2	2	C	2	2	C	2	2	C	1	2	C	2	2	C	2	2	C	2	2	C	2	2	C	2	2	C	2	1	C	2	2	C	2	2	C	2	2	C	2	2	C	2	2
25	E	E	2	2	E	2	2	E	1	2	E	2	2	A	1	2	E	2	2	E	2	2	E	2	2	E	2	2	E	2	2	E	2	2	E	2	2	E	2	2	E	2	2	E	2	2	E	1	2
26	E	E	2	2	E	2	2	E	2	2	E	1	2	E	2	2	E	2	2	E	2	2	E	2	2	E	2	2	E	2	2	E	2	2	E	2	2	E	2	2	E	2	2	E	2	2	E	2	1
27	E	E	1	2	E	2	2	E	1	2	E	2	2	E	2	2	E	2	2	E	1	2	E	2	2	E	2	2	E	2	2	E	2	2	E	2	2	E	2	2	E	2	2	E	2	2	E	1	2
28	C	C	2	2	C	2	2	C	2	2	C	1	2	C	2	2	C	2	2	C	2	2	C	2	2	C	2	2	C	2	2	C	2	2	C	2	2	C	2	2	C	2	2	C	2	2	C	2	2
29	A	B	1	1	A	1	2	B	1	1	B	1	2	A	1	2	A	2	2	A	2	2	A	2	2	C	1	1	A	2	2	A	2	1	B	2	2	A	2	2	B	2	2	B	2	2	A	2	1
31	C	C	2	2	C	1	2	C	2	2	C	1	2	C	2	1	C	2	2	C	2	2	C	2	2	C	2	2	C	2	2	C	2	2	C	2	2	C	2	2	C	2	2	C	2	2	C	2	2
31	D	D	2	2	D	2	2	D	2	2	D	1	2	D	2	2	D	2	2	D	2	2	D	2	2	D	2	2	D	2	2	D	2	2	D	2	2	D	2	2	D	2	2	D	2	2	D	2	1
32	C	C	2	2	C	2	2	C	2	2	C	2	2	C	2	2	C	2	2	C	2	2	C	1	2	C	2	2	C	2	2	C	1	1	C	2	2	C	2	2	C	1	2	C	2	2	C	2	2
33	B	B	1	1	B	2	2	B	2	2	B	1	1	B	2	2	B	2	2	B	2	2	B	2	2	B	2	2	B	2	2	B	2	2	B	2	2	B	2	2	B	2	2	B	2	2	B	2	2
34	D	D	1	2	D	2	1	D	2	1	D	2	1	D	2	1	D	1	2	D	1	1	D	2	2	D	2	2	D	2	2	D	2	2	D	2	2	D	2	2	D	2	2	D	2	1	D	2	2
35	E	E	2	2	E	2	2	E	2	2	E	1	2	E	2	2	E	2	2	E	2	2	A	1	2	E	2	1	E	2	2	E	2	2	E	2	2	A	2	2	E	2	2	E	2	2	E	2	2
36	D	C	1	2	C	1	1	C	1	1	C	1	1	C	1	2	C	1	1	D	2	2	C	2	1	C	2	2	D	2	2	C	2	2	D	2	2	C	2	2	D	2	2	D	2	2	D	2	2
37	A	A	2	2	A	2	2	A	2	2	A	1	2	A	1	2	A	2	2	A	2	2	A	2	2	A	2	2	A	2	2	A	2	2	A	2	2	A	2	2	A	2	2	A	2	2	A	2	2
38	B	B	2	1	B	1	2	B	2	2	B	2	2	B	2	1	B	2	2	B	2	2	B	2	2	B	2	2	B	2	2	B	2	2	B	1	2	B	2	2	B	2	2	B	2	2	B	2	1
39	D	D	1	1	D	2	2	D	1	2	D	2	1	D	2	2	D	2	2	D	2	2	D	1	2	D	2	1	D	2	2	D	2	2	D	2	2	D	2	2	D	2	2	D	2	2	D	2	1
41	E	E	2	2	E	2	2	E	1	2	E	2	2	E	2	1	E	1	2	E	2	2	E	2	2	E	1	1	E	2	2	E	2	2	E	2	2	E	2	2	E	2	2	E	2	2	E	2	2
41	A	A	1	1	A	2	2	A	1	2	A	1	2	A	1	2	A	1	2	E	1	1	A	2	2	A	2	1	A	2	2	A	2	2	A	2	2	A	2	2	A	2	2	A	2	2	A	2	1
42	C	C	1	2	C	2	2	C	2	2	C	2	2	C	2	1	C	1	2	C	2	2	C	2	2	C	2	1	C	2	2	C	2	2	C	2	2	C	2	2	C	2	2	C	2	2	C	2	2
43	E	E	1	2	E	2	2	E	2	2	E	2	2	E	1	2	E	2	2	E	2	2	E	2	2	A	1	2	E	2	2	E	2	2	E	2	2	E	2	2	E	2	2	E	2	2	E	2	2
44	D	D	1	2	D	1	2	D	2	1	D	2	2	D	2	2	D	2	2	D	2	2	D	1	2	D	2	2	D	2	2	D	2	2	D	2	2	D	2	2	D	2	2	D	2	2	D	1	2
45	C	D	1	2	D	1	1	D	2	1	D	2	2	D	1	2	D	1	2	D	1	1	D	2	2	D	1	1	D	1	1	D	2	1	D	2	2	D	1	2	D	2	2	D	2	2	D	2	1
46	D	D	1	2	D	1	2	D	2	2	D	2	2	D	2	2	E	1	1	E	1	2	E	2	1	E	2	2	D	2	2	D	2	2	E	2	2	E	2	2	D	2	2	D	2	2	D	2	2
47	E	E	2	2	E	1	2	E	2	2	E	2	2	E	2	2	E	2	2	E	2	2	E	2	2	E	2	2	E	2	2	E	2	2	E	2	2	E	2	2	E	1	2	E	2	2	E	1	2
48	D	D	1	2	D	2	2	D	2	2	D	1	2	D	2	2	D	2	2	D	2	2	D	2	2	D	2	2	D	2	2	D	2	2	D	2	2	D	2	2	D	2	2	D	2	2	D	2	2
49	C	C	2	2	C	1	1	C	2	2	C	2	2	C	1	2	C	2	1	C	2	2	C	1	2	C	2	2	C	2	2	C	2	2	C	2	2	C	2	2	C	2	2	C	2	2	C	2	2
51	A	A	2	2	A	2	2	A	2	2	A	2	2	A	2	1	A	2	1	A	2	2	A	2	1	A	2	2	A	2	2	A	2	2	A	2	2	A	2	2	A	2	2	A	2	2	A	2	2
51	E	D	1	2	C	1	2	C	1	1	D	1	2	D	1	1	C	1	1	C	1	2	C	2	1	C	2	1	C	2	2	E	2	2	C	2	1	C	1	2	E	2	2	C	2	2	E	2	2
52	B	A	1	2	A	1	1	A	1	2	A	1	1	A	1	1	A	2	1	A	2	1	A	1	2	A	1	2	A	2	2	C	2	1	C	2	2	A	2	1	C	1	2	C	2	2	B	2	1
53	C	C	2	2	C	2	2	C	2	2	C	2	2	C	2	2	C	2	1	C	1	2	C	2	2	C	2	2	C	2	2	C	2	2	C	2	2	C	2	2	C	2	2	C	2	2	C	1	2
54	E	E	2	2	E	2	2	E	2	2	A	1	2	A	1	1	A	1	1	A	1	1	E	2	1	E	2	2	E	2	2	E	2	2	E	2	2	E	2	2	E	2	2	E	2	2	E	2	2
55	E	E	1	2	E	2	2	E	2	2	E	2	2	E	2	2	E	2	2	E	2	2	E	2	2	E	2	2	E	2	2	E	2	2	E	2	2	E	2	2	E	2	2	E	2	2	E	2	2
56	D	D	2	2	D	2	2	D	1	1	D	2	2	D	1	2	D	2	2	D	2	2	D	2	2	D	2	2	D	2	2	D	2	2	D	2	2	D	2	2	D	2	2	D	2	2	D	2	2
57	D	B	1	2	B	1	2	B	1	1	D	2	2	B	1	2	B	1	1	D	2	2	B	1	2	B	2	2	D	2	2	D	2	2	D	2	2	B	2	2	D	2	2	D	2	2	D	2	2
58	C	C	2	2	C	1	2	C	2	2	C	1	2	C	2	2	C	2	2	C	2	2	C	2	2	C	2	2	C	2	2	C	2	2	C	2	2	C	1	2	C	2	2	C	2	2	C	2	1
59	B	A	1	2	D	1	2	B	2	2	B	2	2	B	1	2	C	1	2	C	1	1	A	1	1	B	2	2	B	2	1	B	2	2	B	2	2	D	1	1	B	2	2	B	2	2	B	2	1
61	C	B	1	2	B	1	1	A	1	1	B	1	2	A	1	1	B	1	2	B	1	1	B	1	1	B	1	2	B	2	2	C	2	2	C	2	2	B	2	2	A	2	2	C	2	2	C	2	1
61	A	A	2	2	A	2	2	A	1	2	A	1	2	A	2	1	A	2	2	A	2	2	A	2	2	A	2	2	A	2	2	A	2	2	A	2	2	A	2	2	A	2	2	A	2	2	A	2	2
62	E	E	2	1	E	2	2	E	2	2	E	2	2	E	2	2	E	2	2	E	2	2	E	2	2	E	2	2	E	2	1	E	1	2	E	2	2	E	2	2	E	2	2	E	2	2	E	2	1
63	C	C	2	1	C	2	1	C	1	2	C	2	2	C	2	2	C	1	2	C	2	2	C	2	2	C	2	2	C	2	2	C	2	2	C	2	2	C	2	2	C	2	2	C	2	2	E	2	1
64	D	D	2	2	D	2	1	D	2	2	D	2	2	D	2	2	D	2	1	D	2	2	D	2	2	D	2	2	D	2	2	D	2	2	D	2	2	D	2	2	D	2	2	D	2	2	D	2	2
65	B	B	2	2	B	1	2	B	1	2	B	2	2	B	2	2	B	2	2	B	2	2	B	1	1	B	1	2	B	2	2	B	2	2	B	2	2	B	2	2	B	2	2	B	2	2	B	2	1
[truncated: 175 more columns]

## Sheet: MCQs Answers
Question	Correct Answer	Claude 3.5-1	Claude 3.5-2	Claude 3.5-3	Claude 3.5-4	Claude 3.5-5	Claude 3.7-1	Claude 3.7-2	Claude 3.7-3	Claude 3.7-4	Claude 3.7-5	Claude 3.7-E-1	Claude 3.7-E-2	Claude 3.7-E-3	Claude 3.7-E-4	Claude 3.7-E-5	ChatGPT o1-1	ChatGPT o1-2	ChatGPT o1-3	ChatGPT o1-4	ChatGPT o1-5	ChatGPT o3-H-1	ChatGPT o3-H-2	ChatGPT o3-H-3	ChatGPT o3-H-4	ChatGPT o3-H-5	ChatGPT 4.5-1	ChatGPT 4.5-2	ChatGPT 4.5-3	ChatGPT 4.5-4	ChatGPT 4.5-5	Gemini 2-1	Gemini 2-2	Gemini 2-3	Gemini 2-4	Gemini 2-5	DeepSeek-1	DeepSeek-2	DeepSeek-3	DeepSeek-4	DeepSeek-5	DeepSeek-R1-1	DeepSeek-R1-2	DeepSeek-R1-3	DeepSeek-R1-4	DeepSeek-R1-5	Qwen 2.5-M-1	Qwen 2.5-M-2	Qwen 2.5-M-3
1	D	B	B	B	B	B	D	C	D	C	D	D	D	D	D	D	D	D	D	D	D	D	D	D	D	D	B	B	D	B	B	B	B	B	B	B	B	B	B	B	B	B	B	B	B	B	B	B	B
2	C	B	B	B	B	B	B	B	B	B	B	B	B	B	B	B	C	C	C	C	C	B	C	B	B	B	C	C	C	C	C	C	C	C	C	C	B	B	B	B	B	B	B	B	B	B	A	A	B
3	D	D	D	D	D	D	D	D	D	D	D	D	D	D	D	D	D	D	D	D	D	D	D	D	D	D	D	D	D	D	D	D	D	D	D	D	D	D	D	D	D	D	D	D	D	D	D	D	D
4	C	C	B	C	C	C	C	C	C	C	C	C	C	C	C	C	C	C	C	C	C	C	C	C	C	C	C	C	C	C	C	C	C	C	C	C	A	A	C	C	C	C	C	C	C	C	C	C	C
5	A	A	A	A	A	A	A	A	A	A	A	A	A	A	A	A	A	A	A	A	A	A	A	A	A	A	A	A	A	A	A	B	A	A	A	A	A	A	A	A	A	A	A	A	A	A	A	A	A
6	B	B	B	B	B	B	B	B	B	B	B	B	B	B	B	B	B	B	B	B	B	B	B	B	B	B	B	B	B	B	B	B	B	B	B	B	B	B	B	B	B	B	B	B	B	B	B	D	B
7	B	B	B	B	B	B	B	B	B	B	B	B	B	B	B	B	B	B	B	B	B	B	B	B	B	B	B	B	B	B	B	B	B	B	B	B	B	B	B	B	B	B	B	B	B	B	B	A	B
8	C	C	C	C	C	C	C	C	C	C	C	C	C	C	C	C	C	C	C	C	C	C	C	C	C	C	C	C	C	C	C	C	C	C	C	C	C	C	C	C	C	C	C	C	C	C	C	C	C
9	C	C	C	C	C	C	C	C	C	C	C	C	C	C	C	C	C	C	C	C	C	C	C	C	C	C	C	C	C	C	C	C	E	C	C	C	C	C	C	C	C	C	C	C	C	C	C	C	C
10	A	A	A	A	A	A	A	A	A	A	A	A	A	A	A	A	A	A	A	A	A	A	A	A	A	A	A	A	A	A	A	A	A	A	A	A	A	A	A	A	A	A	A	A	A	A	A	A	A
11	C	C	C	C	C	C	C	C	C	C	C	C	C	C	C	C	C	C	C	C	C	C	C	C	C	C	C	C	C	C	C	C	C	C	C	C	C	C	C	C	C	C	C	C	C	C	C	C	C
12	B	B	B	B	B	B	B	B	B	B	B	B	B	B	B	B	B	B	B	B	B	B	B	B	B	B	B	B	B	B	B	B	B	B	B	B	B	B	B	B	B	B	B	B	B	B	B	B	B
13	B	B	B	B	B	B	B	B	B	B	B	B	B	B	B	B	B	B	B	B	B	B	B	B	B	B	B	B	B	B	B	B	B	B	B	B	B	B	B	B	B	B	B	B	B	B	C	B	B
14	E	C	C	C	C	C	A	C	A	A	A	E	C	A	B	E	E	E	E	E	E	E	E	E	E	E	E	E	E	E	E	B	E	E	E	E	C	C	C	C	C	C	E	E	C	C	E	E	E
15	D	D	D	D	D	D	D	D	D	D	D	D	D	D	D	D	D	D	D	D	D	D	D	D	D	D	D	D	D	D	D	D	D	D	D	D	D	D	D	D	D	D	D	D	D	D	D	D	D
16	B	B	B	B	B	B	B	B	B	B	B	B	B	B	B	B	B	B	B	B	B	B	B	B	B	B	B	B	B	B	B	B	B	B	B	B	B	B	B	B	B	B	B	B	B	B	B	B	B
17	E	E	E	E	E	E	E	E	E	E	E	E	E	E	E	E	E	E	E	E	E	E	E	E	E	E	E	E	E	E	E	E	E	E	E	E	E	E	E	E	E	E	E	E	E	E	E	E	E
18	B	B	B	B	B	B	B	B	B	B	B	B	B	B	B	B	B	B	B	B	B	B	B	B	B	B	B	B	B	B	B	B	B	B	B	B	B	B	B	B	B	B	B	B	B	B	B	B	B
19	C	C	C	C	C	C	C	C	C	C	C	C	C	C	C	C	C	C	C	C	C	C	C	C	C	C	C	C	C	C	C	C	C	C	C	C	C	C	C	C	C	C	C	C	C	C	C	C	C
20	B	B	B	B	B	B	B	B	B	B	B	B	B	B	B	B	B	B	B	B	B	B	B	B	B	B	B	B	B	B	B	A	B	B	B	B	B	B	B	B	B	B	B	B	B	B	B	B	B
21	B	B	B	B	B	B	B	B	B	B	B	B	B	B	B	B	B	B	B	B	B	B	B	B	B	B	B	B	B	B	B	B	B	B	B	B	B	B	B	B	B	B	B	B	B	B	C	C	C
22	B	B	B	B	B	B	B	B	B	B	B	B	B	B	B	B	B	B	B	B	B	B	B	B	B	B	B	B	B	B	B	B	B	B	B	B	B	B	B	B	B	B	B	B	B	B	B	B	B
23	B	B	B	B	B	B	B	B	B	B	B	B	B	B	B	B	B	B	B	B	B	B	B	B	B	B	B	B	B	B	B	B	B	B	B	B	B	B	B	B	B	B	B	B	B	B	B	D	B
24	C	C	C	C	C	C	C	C	C	C	C	C	C	C	C	C	C	C	C	C	C	C	C	C	C	C	C	C	C	C	C	C	C	C	C	C	C	C	C	C	C	C	C	C	C	C	C	C	C
25	E	E	E	E	E	A	E	E	E	E	E	E	E	E	E	E	E	E	E	E	E	E	A	E	E	A	E	E	E	E	E	E	E	E	E	E	A	A	A	A	A	A	A	A	A	A	E	E	E
26	E	E	E	E	E	E	E	E	E	E	E	E	E	E	E	E	E	E	E	E	E	E	E	E	E	E	E	E	E	E	E	E	E	E	E	E	E	E	E	E	E	E	E	E	E	E	E	E	C
27	E	E	E	E	E	E	E	E	E	E	E	E	E	E	E	E	E	E	E	E	E	E	E	E	E	E	E	E	E	E	E	E	E	E	E	E	E	E	E	E	E	E	E	E	E	E	E	B	E
28	C	C	C	C	C	C	C	C	C	C	C	C	C	C	C	C	C	C	C	C	C	C	C	C	C	C	C	C	C	C	C	A	C	A	A	A	C	C	C	C	C	C	C	C	C	C	C	C	C
29	A	B	A	B	B	A	A	A	A	C	A	A	B	A	B	B	A	A	A	A	A	A	A	A	A	A	A	A	A	A	A	D	D	A	D	D	A	A	A	A	A	A	A	A	A	A	E	B	A
30	C	C	C	C	C	C	C	C	C	C	C	C	C	C	C	C	C	C	C	C	C	C	C	C	C	C	C	C	C	C	C	C	C	C	C	C	C	C	C	C	C	C	C	C	C	C	C	C	C
31	D	D	D	D	D	D	D	D	D	D	D	D	D	D	D	D	D	D	D	D	D	D	D	D	D	D	D	D	D	D	D	D	D	D	D	D	D	D	D	D	D	D	D	D	D	D	D	D	D
32	C	C	C	C	C	C	C	C	C	C	C	C	C	C	C	C	C	C	C	C	C	C	C	C	C	C	C	C	C	C	C	C	C	C	C	C	C	C	C	C	C	C	C	C	C	C	C	C	C
33	B	B	B	B	B	B	B	B	B	B	B	B	B	B	B	B	B	B	B	B	B	B	B	B	B	B	B	B	B	B	B	B	B	B	B	B	B	B	B	B	B	B	B	B	B	B	B	B	B
34	D	D	D	D	D	D	D	D	D	D	D	D	D	D	D	D	D	D	D	D	D	D	D	D	D	D	D	D	D	D	D	D	E	D	D	D	D	D	D	D	D	D	D	D	D	D	D	D	D
35	E	E	E	E	E	E	E	E	A	E	E	E	E	A	E	E	E	E	E	E	E	E	E	E	E	E	E	E	E	E	E	E	E	E	E	E	E	E	E	E	E	E	E	E	E	E	C	E	E
36	D	C	C	C	C	C	C	D	C	C	D	C	D	C	D	D	D	D	D	D	D	D	D	D	D	D	D	D	D	D	D	C	B	C	C	C	C	C	C	C	C	C	C	C	C	C	C	C	C
37	A	A	A	A	A	A	A	A	A	A	A	A	A	A	A	A	A	A	A	A	A	A	A	A	A	A	A	A	A	A	A	A	A	A	A	A	A	A	A	A	A	A	A	A	A	A	A	A	A
38	B	B	B	B	B	B	B	B	B	B	B	B	B	B	B	B	B	B	B	B	B	C	C	B	B	B	B	B	B	B	B	E	B	B	B	B	B	B	B	B	B	B	B	B	B	B	B	B	B
39	D	D	D	D	D	D	D	D	D	D	D	D	D	D	D	D	D	D	D	D	D	D	D	D	D	D	D	D	D	D	D	D	D	D	D	D	D	D	D	D	D	D	D	D	D	D	D	D	D
40	E	E	E	E	E	E	E	E	E	E	E	E	E	E	E	E	E	E	E	E	E	E	E	E	E	E	E	E	E	E	E	E	E	E	E	E	E	E	E	E	E	E	E	E	E	E	E	E	E
41	A	A	A	A	A	A	A	E	A	A	A	A	A	A	A	A	A	A	A	A	A	B	A	B	B	B	A	A	A	A	A	A	A	A	A	A	A	A	A	A	A	A	A	A	A	E	E	A	A
42	C	C	C	C	C	C	C	C	C	C	C	C	C	C	C	C	C	C	C	C	C	C	C	C	C	C	C	C	C	C	C	C	E	C	C	C	C	C	C	C	C	C	C	C	C	C	D	C	C
43	E	E	E	E	E	E	E	E	E	A	E	E	E	E	E	E	E	E	E	E	E	E	E	E	E	E	E	E	E	A	E	B	B	B	B	B	A	A	E	A	E	A	A	A	A	A	A	A	A
44	D	D	D	D	D	D	D	D	D	D	D	D	D	D	D	D	D	D	D	D	D	D	D	D	D	D	D	D	D	D	D	D	D	D	D	D	D	D	D	D	D	D	D	D	D	D	D	D	D
45	C	D	D	D	D	D	D	D	D	D	D	D	D	D	D	D	D	D	D	D	D	D	D	D	D	D	D	D	D	D	D	D	D	D	D	D	D	D	D	D	D	D	D	D	D	D	D	D	D
46	D	D	D	D	D	D	E	E	E	E	D	D	E	E	D	D	D	D	D	D	D	E	E	E	E	E	D	D	D	D	D	E	E	E	E	E	D	D	D	D	E	D	D	D	D	D	D	C	D
47	E	E	E	E	E	E	E	E	E	E	E	E	E	E	E	E	E	E	E	E	E	E	E	E	E	E	E	E	E	E	E	E	E	E	E	E	E	E	E	E	E	E	E	E	E	E	E	E	E
48	D	D	D	D	D	D	D	D	D	D	D	D	D	D	D	D	D	D	D	D	D	D	D	D	D	D	D	D	D	D	D	D	D	D	D	D	D	D	D	D	D	D	D	D	D	D	D	D	D
49	C	C	C	C	C	C	C	C	C	C	C	C	C	C	C	C	C	C	C	C	C	C	C	C	C	C	C	C	C	C	C	C	C	C	C	C	C	C	C	C	C	C	C	C	C	C	C	C	C
50	A	A	A	A	A	A	A	A	A	A	A	A	A	A	A	A	A	A	A	A	A	A	A	A	A	A	A	A	E	E	E	E	A	A	A	A	E	D	C	D	C	A	A	A	A	A	D	D	D
51	E	D	C	C	D	D	C	C	C	C	C	E	C	C	E	C	E	E	E	E	E	E	E	E	E	E	E	E	E	E	E	D	D	D	D	D	E	E	E	E	E	E	E	E	E	E	C	C	C
52	B	A	A	A	A	A	A	A	A	A	A	C	C	A	C	C	B	B	B	B	B	A	B	B	B	B	C	C	C	C	C	A	A	A	A	A	C	A	C	C	C	B	B	B	B	B	A	A	A
53	C	C	C	C	C	C	C	C	C	C	C	C	C	C	C	C	C	C	C	C	C	C	C	C	C	C	C	C	C	C	C	C	C	C	E	C	C	C	C	C	C	C	C	C	C	C	C	C	C
54	E	E	E	E	A	A	A	A	E	E	E	E	E	E	E	E	E	E	E	E	E	E	E	E	E	E	E	E	E	E	E	B	B	B	C	B	A	A	A	A	A	A	E	A	E	E	E	A	A
55	E	E	E	E	E	E	E	E	E	E	E	E	E	E	E	E	E	E	E	E	E	E	E	E	E	E	E	E	E	E	E	E	E	E	A	E	A	A	A	A	A	A	A	A	A	A	E	C	E
56	D	D	D	D	D	D	D	D	D	D	D	D	D	D	D	D	D	D	D	D	D	D	D	D	D	D	D	D	D	D	D	D	D	D	D	D	D	D	D	D	D	D	D	D	D	D	D	D	D
57	D	B	B	B	D	B	B	D	B	B	D	D	D	B	D	D	D	B	B	D	D	B	B	B	B	B	B	B	B	B	B	B	C	C	C	D	B	B	B	B	B	D	D	D	D	D	B	B	B
58	C	C	C	C	C	C	C	C	C	C	C	C	C	C	C	C	C	C	C	C	C	C	C	C	C	C	C	C	C	C	C	C	C	C	C	C	C	C	C	C	C	C	C	C	C	C	C	C	C
59	B	A	D	B	B	B	C	C	A	B	B	B	B	D	B	B	B	B	B	B	B	C	A	A	A	A	B	B	B	B	B	B	B	B	B	B	B	B	B	B	B	B	B	D	B	B	B	D	A
60	C	B	B	A	B	A	B	B	B	B	B	C	C	B	A	C	C	C	C	C	C	B	B	A	B	B	C	C	C	C	B	B	B	B	B	B	B	B	B	B	B	C	C	C	C	C	B	B	B
61	A	A	A	A	A	A	A	A	A	A	A	A	A	A	A	A	A	A	A	A	A	A	A	A	A	A	A	A	A	A	A	A	A	A	A	A	D	D	D	D	D	A	A	A	A	A	A	A	A
62	E	E	E	E	E	E	E	E	E	E	E	E	E	E	E	E	E	E	E	E	E	E	E	E	E	E	E	E	E	E	E	E	E	E	E	E	E	E	E	E	E	E	E	E	E	E	E	E	C
63	C	C	C	C	C	C	C	C	C	C	C	C	C	C	C	C	E	E	E	E	E	C	C	C	C	C	C	C	C	C	C	E	C	C	C	C	E	E	E	E	E	C	E	E	C	E	E	E	E
64	D	D	D	D	D	D	D	D	D	D	D	D	D	D	D	D	D	D	D	D	D	D	D	D	D	D	D	D	D	D	D	D	A	A	A	A	A	A	A	A	A	D	D	A	D	D	A	A	A
65	B	B	B	B	B	B	B	B	B	B	B	B	B	B	B	B	B	B	B	B	B	B	B	B	B	B	B	B	B	B	B	B	B	B	B	B	B	B	B	B	B	B	B	B	B	B	B	B	B
[truncated: 17 more columns]

## Sheet: Final Relevance Score
Question	Claude 3.5-1 Relevance	Claude 3.5-2 Relevance	Claude 3.5-3 Relevance	Claude 3.5-4 Relevance	Claude 3.5-5 Relevance	Claude 3.7-1 Relevance	Claude 3.7-2 Relevance	Claude 3.7-3 Relevance	Claude 3.7-4 Relevance	Claude 3.7-5 Relevance	Claude 3.7-E-1 Relevance	Claude 3.7-E-2 Relevance	Claude 3.7-E-3 Relevance	Claude 3.7-E-4 Relevance	Claude 3.7-E-5 Relevance	ChatGPT o1-1 Relevance	ChatGPT o1-2 Relevance	ChatGPT o1-3 Relevance	ChatGPT o1-4 Relevance	ChatGPT o1-5 Relevance	ChatGPT o3-H-1 Relevance	ChatGPT o3-H-2 Relevance	ChatGPT o3-H-3 Relevance	ChatGPT o3-H-4 Relevance	ChatGPT o3-H-5 Relevance	ChatGPT 4.5-1 Relevance	ChatGPT 4.5-2 Relevance	ChatGPT 4.5-3 Relevance	ChatGPT 4.5-4 Relevance	ChatGPT 4.5-5 Relevance	Gemini 2-1 Relevance	Gemini 2-2 Relevance	Gemini 2-3 Relevance	Gemini 2-4 Relevance	Gemini 2-5 Relevance	DeepSeek-1 Relevance	DeepSeek-2 Relevance	DeepSeek-3 Relevance	DeepSeek-4 Relevance	DeepSeek-5 Relevance	DeepSeek-R1-1 Relevance	DeepSeek-R1-2 Relevance	DeepSeek-R1-3 Relevance	DeepSeek-R1-4 Relevance	DeepSeek-R1-5 Relevance	Qwen 2.5-M-1 Relevance	Qwen 2.5-M-2 Relevance	Qwen 2.5-M-3 Relevance	Qwen 2.5-M-4 Relevance
1	2	2	2	2	2	2	1	2	1	2	2	2	2	2	2	1	2	2	2	1	2	2	2	2	1	2	2	2	2	2	2	2	1	1	2	2	1	1	2	2	2	2	2	2	2	2	2	1	1
2	2	1	2	1	1	2	2	2	1	2	2	2	2	2	2	2	2	2	2	2	1	1	2	1	2	2	2	2	2	2	2	2	2	2	1	1	2	2	1	2	2	1	1	1	2	1	1	1	2
3	2	2	1	2	2	2	2	2	2	2	2	2	2	2	2	2	1	2	2	2	2	2	2	2	2	2	2	2	2	2	2	2	2	2	1	2	2	2	2	2	2	1	2	2	2	2	2	2	2
4	2	2	2	2	2	2	2	2	1	2	2	2	2	2	2	2	1	2	1	2	2	1	2	1	2	2	2	2	2	2	1	2	2	1	2	1	1	2	2	1	2	1	2	2	2	2	2	2	1
5	2	2	2	2	2	2	2	2	2	2	2	2	2	2	2	2	1	2	2	1	2	1	1	2	2	2	2	2	2	2	2	2	2	2	2	2	2	2	1	2	2	2	1	2	1	2	2	2	2
6	2	2	2	1	2	2	2	2	2	2	2	2	1	2	2	2	2	1	2	2	2	2	2	2	2	2	2	2	2	2	2	2	2	2	1	1	2	2	1	1	2	2	2	2	2	2	1	2	2
7	2	2	2	2	2	2	2	2	2	2	2	2	2	2	2	2	2	2	2	2	1	2	1	2	1	2	2	2	2	2	1	2	2	2	2	2	2	2	2	2	2	1	2	2	2	2	2	1	2
8	2	2	2	2	2	2	2	2	2	2	2	2	2	2	2	2	2	2	2	2	2	2	2	2	2	2	2	2	2	2	2	2	2	2	2	2	2	2	2	2	2	1	2	2	2	1	2	1	1
9	2	2	2	2	2	2	2	2	2	2	2	2	2	2	2	2	2	2	2	2	2	2	2	2	2	2	2	2	2	2	2	1	2	1	2	1	2	2	2	2	2	2	2	2	2	2	2	2	2
10	2	2	1	2	2	2	1	2	2	2	2	2	2	2	2	2	1	2	2	1	2	2	1	2	2	2	2	2	2	2	2	2	2	2	2	2	2	2	2	1	2	2	2	2	2	2	2	1	2
11	1	2	2	1	2	2	2	2	2	2	2	2	2	2	2	1	2	2	2	2	1	2	2	2	2	2	2	2	2	2	2	2	2	1	2	2	2	2	2	2	2	1	1	2	2	2	1	2	2
12	2	2	2	1	2	2	2	2	2	2	2	2	2	2	2	2	2	2	2	2	2	1	2	2	2	2	2	2	2	2	2	2	2	1	2	2	2	2	2	2	2	2	2	2	2	2	2	2	2
13	2	2	2	2	2	2	2	2	2	2	2	1	2	2	2	2	2	2	2	2	2	2	2	1	2	2	2	2	2	2	1	2	2	1	2	2	2	2	2	2	2	2	2	1	2	1	1	2	2
14	2	2	2	2	1	2	1	2	1	2	2	1	1	2	2	2	2	2	2	2	2	2	2	2	2	2	2	2	2	2	2	2	2	2	2	2	2	2	1	2	1	1	2	1	1	2	2	2	1
15	2	2	1	2	2	2	2	2	2	2	2	2	2	2	2	2	2	2	2	2	2	1	2	2	2	2	2	2	2	2	2	2	2	2	2	2	2	2	2	2	2	2	1	2	2	2	2	1	1
16	2	2	2	2	1	2	2	2	2	2	2	2	2	2	2	2	2	1	2	2	2	2	1	2	2	2	2	2	2	2	2	1	2	2	2	2	2	2	1	1	2	1	1	2	2	2	1	2	1
17	2	2	2	2	2	2	2	2	2	2	2	2	1	2	2	2	2	1	2	2	2	2	2	2	2	2	2	2	2	2	1	2	2	2	2	1	2	2	2	2	2	2	2	2	1	2	1	2	2
18	2	2	2	2	2	2	2	2	2	2	2	2	2	2	2	2	2	2	1	1	2	2	2	2	1	2	2	2	2	2	2	2	2	1	2	2	2	2	1	2	2	2	2	2	2	1	2	1	2
19	2	2	2	2	2	2	2	2	2	2	2	2	2	2	2	1	1	2	2	2	2	2	2	2	2	2	2	2	2	2	2	2	2	2	2	2	2	2	2	1	2	2	2	1	2	2	2	2	2
20	2	2	2	2	2	2	2	2	2	2	2	2	2	2	2	1	1	2	2	1	2	2	2	2	2	2	2	2	2	2	2	2	2	2	2	2	2	1	2	2	2	2	2	2	2	2	2	2	2
21	2	2	1	2	2	2	2	2	2	2	2	2	2	2	2	2	2	1	2	2	2	1	1	2	2	2	2	2	2	2	2	2	2	2	2	2	2	2	2	2	2	2	1	2	2	1	1	1	1
22	2	2	2	2	2	2	2	2	2	2	2	2	2	2	2	2	1	2	1	2	2	2	2	2	2	2	2	2	2	2	2	1	1	2	2	2	2	1	2	2	1	2	2	2	2	2	2	1	2
23	1	2	2	2	2	2	2	2	2	2	2	2	2	2	2	2	1	2	2	2	2	1	2	2	1	2	2	2	2	2	2	2	2	2	2	2	2	2	2	1	2	1	1	2	2	2	1	2	2
24	2	2	2	2	2	2	2	2	2	2	1	2	2	2	2	2	2	2	2	2	1	1	1	2	1	2	2	2	2	2	2	2	2	2	2	2	2	2	2	2	2	2	1	1	2	1	2	2	2
25	2	2	2	2	2	2	2	2	2	2	2	2	2	2	2	2	2	2	2	1	2	2	2	2	2	2	2	2	2	2	2	2	2	2	2	1	2	1	2	2	1	2	1	2	1	2	1	2	2
26	2	2	2	2	2	2	2	2	2	2	2	2	2	2	2	1	2	1	2	2	2	2	2	2	2	2	2	2	2	2	2	2	1	2	2	1	2	2	2	2	2	2	2	2	2	2	1	2	1
27	2	2	2	2	2	2	2	2	2	2	2	2	2	2	2	2	2	2	2	1	1	2	2	2	2	2	2	2	2	2	2	2	2	2	2	2	2	2	2	2	2	2	2	1	2	2	1	2	1
28	2	2	2	2	2	2	2	2	2	2	2	2	2	2	2	2	1	1	2	2	2	2	2	2	1	2	2	2	2	2	2	2	2	2	2	2	2	2	2	2	2	2	2	2	1	1	2	2	2
29	1	2	1	2	2	2	2	2	1	2	1	2	2	2	2	1	1	2	2	2	2	2	2	2	2	2	2	2	2	2	2	2	2	1	2	2	2	2	2	2	2	2	2	2	2	1	2	2	2
30	2	2	2	2	1	2	2	2	2	2	2	2	2	2	2	2	2	1	2	2	2	1	2	2	2	2	2	2	2	2	2	2	2	2	2	2	2	2	2	2	2	2	1	1	2	2	2	2	2
31	2	2	2	2	2	2	2	2	2	2	2	2	2	2	2	1	2	2	2	2	2	2	2	2	2	2	2	2	2	2	2	2	2	2	2	2	2	1	2	1	2	2	2	2	2	2	2	2	1
32	2	2	2	2	2	2	2	2	2	2	1	2	2	2	2	2	1	2	2	1	2	2	2	2	1	2	2	2	2	2	2	2	2	2	2	2	2	2	2	1	2	2	2	2	2	2	2	2	1
33	1	2	2	1	2	2	2	2	2	2	2	2	2	2	2	2	2	2	2	2	2	1	2	2	2	2	2	2	2	2	2	2	2	1	2	2	2	1	2	2	2	1	2	2	2	1	2	2	1
34	2	1	1	1	1	2	1	2	2	2	2	2	2	2	1	2	2	2	2	2	2	2	1	2	2	2	2	2	2	2	2	1	2	2	2	1	1	2	2	2	1	2	1	2	1	2	2	2	2
35	2	2	2	2	2	2	2	2	1	2	2	2	2	2	2	2	2	2	2	2	2	2	2	2	2	2	2	2	2	2	2	2	2	1	2	2	2	2	1	2	2	2	1	2	2	1	2	2	2
36	2	1	1	1	2	1	2	1	2	2	2	2	2	2	2	2	1	2	2	2	2	2	2	2	2	2	2	2	2	2	1	1	2	1	2	2	2	2	2	1	2	2	2	1	2	2	1	2	2
37	2	2	2	2	2	2	2	2	2	2	2	2	2	2	2	2	2	2	2	2	2	2	2	2	2	2	2	2	2	2	2	2	2	2	1	2	2	2	2	1	2	2	2	2	2	2	1	2	2
38	1	2	2	2	1	2	2	2	2	2	2	2	2	2	2	1	2	2	2	2	1	2	2	1	2	2	2	2	2	2	1	2	2	2	1	2	2	2	2	2	2	2	2	2	2	2	2	2	2
39	1	2	2	1	2	2	2	2	1	2	2	2	2	2	2	1	2	2	2	2	1	2	2	1	1	2	2	2	2	2	2	2	2	2	2	2	2	1	2	2	2	2	1	2	2	2	2	2	2
40	2	2	2	2	1	2	2	2	1	2	2	2	2	2	2	2	2	1	2	2	2	2	1	2	2	2	2	2	2	2	2	2	2	2	2	2	2	2	2	2	2	1	2	2	1	2	2	2	2
41	1	2	2	2	2	2	1	2	1	2	2	2	2	2	2	1	1	2	2	2	2	1	1	1	2	2	2	2	2	2	2	2	2	1	2	2	2	2	2	2	2	2	2	1	2	2	2	2	1
42	2	2	2	2	1	2	2	2	1	2	2	2	2	2	2	2	2	2	2	1	2	2	2	2	2	2	2	2	2	2	2	2	2	2	2	2	2	2	2	2	2	2	2	2	2	2	2	1	2
43	2	2	2	2	2	2	2	2	2	2	2	2	2	2	2	2	1	2	2	2	2	2	1	1	2	2	2	2	1	2	1	2	2	2	2	1	2	2	1	2	2	2	2	1	1	2	1	2	1
44	2	2	1	2	2	2	2	2	2	2	2	2	2	2	2	2	2	1	1	2	1	2	2	1	2	2	2	2	2	2	1	1	2	2	2	2	2	2	2	1	1	2	2	2	2	2	2	2	1
45	2	1	1	2	2	2	1	2	1	1	1	2	2	2	2	1	2	2	2	1	1	2	1	1	1	2	2	2	2	2	2	1	2	2	1	1	1	1	2	2	2	2	2	2	1	2	1	1	1
46	2	2	2	2	2	1	2	1	2	2	2	2	2	2	2	2	1	2	2	2	1	2	1	2	2	2	2	2	2	2	2	2	2	1	1	2	2	2	2	1	2	2	2	2	2	2	2	1	2
47	2	2	2	2	2	2	2	2	2	2	2	2	2	2	2	2	1	2	2	2	2	2	2	2	2	2	2	2	2	2	2	2	2	2	2	2	2	2	2	2	2	2	1	2	2	2	2	1	2
48	2	2	2	2	2	2	2	2	2	2	2	2	2	2	2	2	2	2	2	2	2	2	2	2	2	2	2	2	2	2	2	1	2	2	2	2	2	2	2	2	2	2	2	2	2	2	2	2	2
49	2	1	2	2	2	1	2	2	2	2	2	2	2	2	2	2	2	2	1	2	2	1	2	2	2	2	2	2	2	2	1	2	2	2	2	2	2	2	1	2	1	1	2	2	2	2	2	1	1
50	2	2	2	2	1	1	2	1	2	2	2	2	2	2	2	2	1	2	2	2	1	2	2	1	2	2	2	1	1	1	2	2	2	1	1	2	1	2	2	2	2	2	2	2	2	2	1	2	1
51	2	2	1	2	1	1	2	1	1	2	2	1	2	2	2	2	2	2	2	2	1	2	2	2	1	2	2	2	2	2	2	2	2	1	2	2	2	2	2	2	2	2	2	1	1	1	2	1	1
52	2	1	2	1	1	1	1	2	2	2	1	2	1	2	2	1	1	2	1	2	1	2	2	2	2	1	2	2	2	2	2	1	2	2	2	1	2	2	1	2	2	2	2	2	2	1	1	1	1
53	2	2	2	2	2	1	2	2	2	2	2	2	2	2	2	2	2	2	1	2	2	1	2	2	2	2	2	2	2	2	2	2	2	2	2	2	2	2	1	2	1	2	1	2	2	2	2	2	1
54	2	2	2	2	1	1	1	1	2	2	2	2	2	2	2	2	2	2	2	2	2	1	2	2	2	2	2	2	2	2	1	2	2	2	2	1	2	2	2	2	1	2	1	1	2	2	2	2	1
55	2	2	2	2	2	2	2	2	2	2	2	2	2	2	2	2	1	1	2	2	2	1	2	1	2	2	2	2	2	2	2	1	2	1	2	2	2	2	1	2	1	1	2	1	1	2	1	2	1
56	2	2	1	2	2	2	2	2	2	2	2	2	2	2	2	2	2	2	1	2	2	1	2	2	2	2	2	2	2	2	2	2	2	2	2	2	2	2	2	2	2	2	1	2	1	2	2	1	1
57	2	2	1	2	2	1	2	2	2	2	2	2	2	2	2	2	2	2	2	2	1	1	2	2	1	1	2	2	2	2	1	1	2	2	1	1	2	2	1	2	2	2	2	2	2	1	1	1	1
58	2	2	2	2	2	2	2	2	2	2	2	2	2	2	2	1	2	2	2	2	2	2	2	2	1	2	2	2	2	2	2	1	1	2	2	2	2	1	1	2	1	1	2	2	2	2	2	2	2
59	2	2	2	2	2	2	1	1	2	1	2	2	1	2	2	1	2	2	2	2	2	2	2	1	1	2	2	2	2	2	2	1	2	2	2	2	2	2	1	2	1	2	1	2	1	2	1	1	2
60	2	1	1	2	1	2	1	1	2	2	2	2	2	2	2	1	1	2	2	2	2	2	1	2	1	2	2	2	2	1	2	1	2	2	1	1	1	2	2	2	2	2	2	2	2	2	1	1	1
61	2	2	2	2	1	2	2	2	2	2	2	2	2	2	2	2	2	2	2	2	2	1	1	2	2	2	2	2	2	2	2	2	1	2	1	1	2	1	1	2	2	2	2	2	2	1	2	2	1
62	1	2	2	2	2	2	2	2	2	1	2	2	2	2	2	1	2	2	2	2	2	2	2	2	2	2	2	2	2	2	2	2	1	2	2	1	2	2	2	2	2	2	2	2	2	1	2	2	2
63	1	1	2	2	2	2	2	2	2	2	2	2	2	2	2	1	2	1	2	2	2	2	1	2	2	2	2	2	2	2	1	2	2	2	2	2	2	1	1	1	2	2	1	1	2	2	1	1	1
64	2	1	2	2	2	1	2	2	2	2	2	2	2	2	2	2	1	2	1	2	2	2	2	2	2	2	2	2	2	2	2	1	2	1	2	2	2	1	1	2	2	2	2	1	2	1	1	1	1
65	2	2	2	2	2	2	2	1	2	2	2	2	2	2	2	1	2	1	2	2	1	2	2	2	1	2	2	2	2	2	2	2	2	1	2	2	2	2	2	2	2	2	1	2	2	2	1	2	1
[truncated: 16 more columns]

## Sheet: Final Comprehensiveness Score
Question	Claude 3.5-1 Comprehensiveness	Claude 3.5-2 Comprehensiveness	Claude 3.5-3 Comprehensiveness	Claude 3.5-4 Comprehensiveness	Claude 3.5-5 Comprehensiveness	Claude 3.7-1 Comprehensiveness	Claude 3.7-2 Comprehensiveness	Claude 3.7-3 Comprehensiveness	Claude 3.7-4 Comprehensiveness	Claude 3.7-5 Comprehensiveness	Claude 3.7-E-1 Comprehensiveness	Claude 3.7-E-2 Comprehensiveness	Claude 3.7-E-3 Comprehensiveness	Claude 3.7-E-4 Comprehensiveness	Claude 3.7-E-5 Comprehensiveness	ChatGPT o1-1 Comprehensiveness	ChatGPT o1-2 Comprehensiveness	ChatGPT o1-3 Comprehensiveness	ChatGPT o1-4 Comprehensiveness	ChatGPT o1-5 Comprehensiveness	ChatGPT o3-H-1 Comprehensiveness	ChatGPT o3-H-2 Comprehensiveness	ChatGPT o3-H-3 Comprehensiveness	ChatGPT o3-H-4 Comprehensiveness	ChatGPT o3-H-5 Comprehensiveness	ChatGPT 4.5-1 Comprehensiveness	ChatGPT 4.5-2 Comprehensiveness	ChatGPT 4.5-3 Comprehensiveness	ChatGPT 4.5-4 Comprehensiveness	ChatGPT 4.5-5 Comprehensiveness	Gemini 2-1 Comprehensiveness	Gemini 2-2 Comprehensiveness	Gemini 2-3 Comprehensiveness	Gemini 2-4 Comprehensiveness	Gemini 2-5 Comprehensiveness	DeepSeek-1 Comprehensiveness	DeepSeek-2 Comprehensiveness	DeepSeek-3 Comprehensiveness	DeepSeek-4 Comprehensiveness	DeepSeek-5 Comprehensiveness	DeepSeek-R1-1 Comprehensiveness	DeepSeek-R1-2 Comprehensiveness	DeepSeek-R1-3 Comprehensiveness	DeepSeek-R1-4 Comprehensiveness	DeepSeek-R1-5 Comprehensiveness	Qwen 2.5-M-1 Comprehensiveness	Qwen 2.5-M-2 Comprehensiveness	Qwen 2.5-M-3 Comprehensiveness	Qwen 2.5-M-4 Comprehensiveness
1	2	1	1	1	1	2	2	2	1	2	2	2	2	2	2	2	2	2	2	1	2	2	2	2	2	2	2	2	2	2	2	2	2	1	2	2	2	2	2	1	1	1	2	1	2	2	1	1	1
2	1	1	1	1	1	1	2	1	1	2	2	2	2	2	2	2	2	2	2	1	2	2	1	1	1	2	2	2	2	2	1	2	2	2	2	2	1	2	2	1	2	1	1	2	2	1	2	2	1
3	1	2	2	2	2	2	2	2	2	2	2	2	2	2	2	2	2	1	2	2	2	2	2	2	2	2	2	2	2	2	2	2	2	2	2	2	2	2	1	1	2	2	2	1	2	2	2	1	1
4	2	1	2	2	2	2	1	2	2	2	2	2	2	2	2	2	2	1	2	2	2	2	2	2	2	2	2	2	2	2	1	1	2	1	2	2	2	2	2	2	2	2	1	2	2	2	2	2	2
5	2	2	1	1	1	1	2	2	2	1	2	2	2	2	2	2	2	2	2	2	2	1	1	2	2	2	2	2	2	2	2	1	2	2	2	2	2	2	2	2	2	2	2	1	2	2	2	2	2
6	2	2	2	1	2	2	2	2	2	2	2	2	2	2	2	2	2	2	2	2	1	2	2	2	2	2	2	2	2	2	2	1	2	2	2	2	1	2	2	2	2	2	2	2	2	2	1	2	2
7	2	2	1	1	1	2	2	2	2	2	2	2	2	2	2	2	2	2	2	2	2	2	2	2	2	2	2	2	2	2	2	2	2	2	2	2	2	2	2	2	2	2	2	2	1	2	2	2	2
8	1	1	1	2	2	1	2	2	2	2	2	2	2	2	2	2	1	2	2	2	2	2	2	2	2	2	2	2	2	2	2	1	2	2	2	2	2	2	2	1	1	1	2	2	2	2	2	1	1
9	2	2	1	1	2	2	2	2	2	2	2	2	2	2	2	2	2	2	2	2	2	2	2	2	2	2	2	2	2	2	2	1	2	2	2	2	2	2	2	1	2	1	2	1	2	2	2	2	1
10	2	2	2	1	2	2	2	2	2	2	2	2	1	1	2	2	2	1	2	2	2	2	1	2	2	2	2	2	2	2	2	2	2	2	2	2	2	2	2	1	2	1	2	2	2	2	2	2	2
11	1	2	2	2	1	2	2	2	1	2	2	2	2	2	2	1	2	2	2	2	1	2	2	2	2	2	2	2	2	2	2	2	2	2	1	2	2	2	1	1	2	2	2	2	1	2	2	1	1
12	2	1	1	2	2	1	2	2	2	2	2	2	2	2	2	2	2	2	2	2	1	2	2	2	2	2	2	2	2	2	2	2	2	2	2	2	2	2	2	2	2	2	2	2	1	2	2	1	2
13	2	2	1	2	2	2	2	2	1	2	2	2	2	2	2	2	1	2	2	1	2	2	1	2	2	2	2	2	2	2	2	2	2	2	2	2	2	2	2	2	2	2	2	1	2	2	1	2	2
14	1	1	1	2	1	2	1	1	1	2	2	2	2	2	2	2	2	2	2	2	2	2	2	2	2	2	2	2	2	2	2	2	2	2	2	2	2	2	2	2	1	2	2	1	1	2	2	2	2
15	2	2	2	2	2	2	2	2	2	2	2	2	2	2	2	2	2	2	1	2	2	2	2	2	2	2	2	2	2	2	2	2	2	2	2	2	2	2	2	2	2	2	2	2	2	2	2	2	2
16	2	1	2	2	2	2	2	2	2	2	2	2	2	2	2	2	2	2	2	2	2	2	2	1	1	2	2	2	2	2	2	2	2	2	2	2	2	2	1	2	1	2	2	2	1	2	2	2	2
17	2	2	2	2	2	2	1	2	1	2	2	2	2	2	2	2	2	2	2	2	2	2	2	2	2	2	2	2	2	2	2	1	2	2	2	2	2	2	1	2	2	2	2	2	2	2	2	2	2
18	2	2	2	2	2	2	2	2	1	2	2	2	1	2	2	2	2	2	2	2	2	1	1	2	2	2	2	2	2	2	2	2	2	2	2	2	2	2	2	2	1	2	2	2	2	2	2	2	2
19	1	1	2	1	2	2	2	2	2	2	2	2	2	2	2	2	2	2	1	2	2	2	2	2	2	2	2	2	2	2	2	2	2	2	2	2	2	2	2	2	2	2	2	1	2	1	2	2	2
20	2	1	2	2	2	2	2	2	2	2	2	2	2	2	2	1	2	1	2	2	2	2	2	2	2	2	2	2	2	2	2	2	2	2	2	2	2	2	2	2	1	2	2	2	1	2	2	2	2
21	2	2	2	2	2	2	2	2	2	2	2	2	2	2	2	2	2	1	2	2	2	2	2	2	2	2	2	2	2	2	2	2	2	2	2	2	1	2	2	2	2	2	2	2	2	1	1	1	1
22	1	2	2	2	2	2	2	2	2	2	2	2	2	2	2	2	2	2	2	1	2	2	2	1	1	2	2	2	2	2	2	1	2	2	2	2	2	2	2	2	1	2	2	1	1	2	2	2	1
23	2	1	1	2	2	2	2	2	2	2	2	2	2	2	2	2	2	2	2	2	2	1	2	2	2	2	2	2	2	2	2	2	2	2	2	2	2	2	2	2	2	2	2	1	2	1	2	2	2
24	1	2	2	2	1	2	2	2	2	2	2	2	2	2	2	2	2	2	1	2	2	2	2	2	2	2	2	2	2	2	2	2	2	2	2	2	2	2	2	2	1	2	1	2	2	1	2	2	1
25	2	2	1	2	1	2	2	2	2	2	2	2	2	2	2	1	2	2	2	2	2	1	2	2	2	2	2	2	2	2	2	2	2	2	2	1	2	2	2	2	1	2	2	2	1	2	2	2	2
26	2	2	2	1	2	2	2	2	2	2	2	2	2	2	2	2	1	1	2	1	1	2	2	1	2	2	2	2	2	2	2	2	2	2	2	1	2	2	2	2	2	2	2	2	1	2	1	2	2
27	1	2	1	2	2	2	1	2	2	2	2	2	2	2	2	1	2	2	2	2	2	2	2	2	2	2	2	2	2	2	2	2	2	2	2	2	1	2	2	2	1	2	2	1	2	1	1	2	2
28	2	2	2	1	2	2	2	2	2	2	2	2	2	2	2	2	2	2	2	2	2	2	2	1	2	2	2	2	2	2	2	2	2	1	2	2	2	2	2	2	2	2	2	2	2	2	1	2	2
29	1	1	1	1	1	2	2	2	1	2	2	2	2	2	2	2	2	2	2	2	2	2	2	2	2	2	2	2	2	2	2	2	2	1	2	2	2	2	2	2	2	2	2	2	2	2	1	2	1
30	2	1	2	1	2	2	2	2	2	2	2	2	2	2	2	2	2	1	2	2	2	2	2	2	2	2	2	2	2	2	2	2	2	2	2	2	2	2	2	2	2	2	1	2	2	1	1	2	2
31	2	2	2	1	2	2	2	2	2	2	2	2	2	2	2	2	2	2	2	2	1	2	1	2	1	2	2	2	2	2	1	2	2	1	2	2	1	2	2	2	2	2	1	2	2	1	2	2	2
32	2	2	2	2	2	2	2	1	2	2	1	2	2	1	2	2	2	2	2	2	2	2	1	2	2	2	2	2	2	2	2	2	2	2	2	2	2	2	2	2	2	2	2	2	2	2	2	2	1
33	1	2	2	1	2	2	2	2	2	2	2	2	2	2	2	2	2	2	2	2	1	2	2	1	2	2	2	2	2	2	2	2	2	2	2	2	2	2	2	2	2	1	1	2	2	2	1	2	1
34	1	2	2	2	2	1	1	2	2	2	2	2	2	2	2	2	2	2	1	2	2	2	2	2	2	2	2	2	2	2	2	2	2	2	2	2	2	2	2	2	2	1	2	1	2	2	2	2	2
35	2	2	2	1	2	2	2	1	2	2	2	2	2	2	2	2	1	1	2	2	2	2	2	2	2	2	2	2	2	2	2	2	2	2	2	2	2	2	2	1	2	2	2	2	1	2	1	2	2
36	1	1	1	1	1	1	2	2	2	2	2	2	2	2	2	2	2	2	2	2	2	2	2	2	2	2	2	2	2	2	2	2	2	2	2	2	1	2	1	1	2	1	2	2	2	2	2	2	1
37	2	2	2	1	1	2	2	2	2	2	2	2	2	2	2	2	1	2	1	2	2	2	2	2	2	2	2	2	2	2	2	2	2	2	2	2	2	2	2	2	2	1	2	2	1	2	2	2	2
38	2	1	2	2	2	2	2	2	2	2	2	1	2	2	2	2	2	2	2	1	1	2	2	2	1	2	2	2	2	2	2	2	2	2	2	2	2	2	2	1	2	2	2	2	2	2	2	2	2
39	1	2	1	2	2	2	2	1	2	2	2	2	2	2	2	2	2	2	2	2	1	2	2	2	2	2	2	2	2	2	2	1	2	1	1	2	2	2	1	2	2	1	1	2	2	2	2	2	1
40	2	2	1	2	2	1	2	2	1	2	2	2	2	2	2	2	1	2	1	2	2	2	1	2	1	2	2	2	2	2	2	2	2	2	1	2	2	2	2	2	2	1	2	2	1	2	2	1	2
41	1	2	1	1	1	1	1	2	2	2	2	2	2	2	2	2	2	2	2	2	2	2	2	1	1	2	2	2	2	2	2	2	2	2	2	2	2	2	1	2	2	2	2	2	1	1	2	2	2
42	1	2	2	2	2	1	2	2	2	2	2	2	2	2	2	2	2	2	2	2	2	2	2	2	1	2	2	2	2	2	2	2	2	2	1	2	2	2	2	2	2	2	2	2	2	1	2	1	1
43	1	2	2	2	1	2	2	2	1	2	2	2	2	2	2	2	1	2	2	2	2	1	1	2	1	2	2	2	0	2	2	1	2	1	2	1	2	2	2	1	1	1	2	1	2	1	1	2	1
44	1	1	2	2	2	2	2	1	2	2	2	2	2	2	2	1	2	2	2	2	1	2	2	2	2	2	2	2	2	2	2	1	2	2	2	2	2	2	2	2	2	2	2	2	2	2	2	1	2
45	1	1	2	2	1	1	1	2	1	1	2	2	1	2	2	2	2	1	1	2	2	2	2	2	2	2	2	2	2	2	2	1	2	2	2	2	1	2	1	1	1	2	2	2	1	2	2	1	1
46	1	1	2	2	2	1	1	2	2	2	2	2	2	2	2	2	2	2	2	2	1	2	2	1	2	2	2	2	2	2	2	1	2	1	2	2	2	2	2	2	2	2	1	1	2	2	1	1	1
47	2	1	2	2	2	2	2	2	2	2	2	2	2	1	2	1	2	2	2	2	2	2	2	2	2	2	2	2	2	2	2	2	2	2	2	2	1	2	2	2	2	1	2	2	2	2	2	2	2
48	1	2	2	1	2	2	2	2	2	2	2	2	2	2	2	2	2	2	2	2	1	2	2	1	2	2	2	2	2	2	2	2	2	2	2	2	2	2	2	2	2	2	2	1	2	2	1	2	1
49	2	1	2	2	1	2	2	1	2	2	2	2	2	2	2	2	2	2	2	2	2	2	1	1	1	2	2	2	2	2	2	2	2	2	2	2	1	2	2	2	1	2	2	2	2	2	2	2	1
50	2	2	2	2	2	2	2	2	2	2	2	2	2	2	2	2	1	1	2	2	2	2	2	2	2	2	2	0	1	1	2	2	2	2	2	2	1	2	1	2	1	2	2	2	2	2	1	1	1
51	1	1	1	1	1	1	1	2	2	2	2	2	1	2	2	2	2	2	2	2	2	2	2	2	2	2	2	2	2	2	2	2	2	1	2	2	2	2	1	1	1	2	2	2	1	2	1	2	1
52	1	1	1	1	1	2	2	1	1	2	2	2	2	1	2	2	1	2	1	1	2	2	2	1	2	1	2	2	2	2	2	2	2	2	2	1	1	2	2	2	2	2	2	1	2	1	1	1	1
53	2	2	2	2	2	2	1	2	2	2	2	2	2	2	2	1	2	2	2	1	2	1	2	1	2	2	2	2	2	2	2	2	2	2	2	2	2	2	2	2	2	2	2	1	2	2	2	2	1
54	2	2	2	1	1	1	1	2	2	2	2	2	2	2	2	2	1	2	2	2	2	2	1	2	2	2	2	2	2	2	2	2	2	2	2	2	2	2	1	1	2	2	1	1	2	2	1	1	2
55	1	2	2	2	2	2	2	2	2	2	2	2	2	2	2	2	1	2	2	2	2	2	2	1	2	2	2	2	2	2	2	2	2	2	2	2	1	2	2	1	1	2	1	1	1	2	1	2	2
56	2	2	1	2	1	2	2	2	2	2	2	2	2	2	2	2	2	2	2	2	2	2	2	2	2	2	2	2	2	2	2	2	2	2	2	1	2	2	2	2	2	2	2	2	2	2	2	2	2
57	1	1	1	2	1	1	2	1	2	2	2	2	2	2	2	2	2	2	2	2	1	1	1	1	2	1	2	2	2	2	2	2	2	1	2	2	2	2	1	2	1	2	2	2	2	1	1	2	1
58	2	1	2	1	2	2	2	2	2	2	2	2	1	2	2	2	2	2	2	2	2	2	2	2	2	2	2	2	2	2	2	1	2	1	2	2	2	2	2	1	2	2	2	1	1	2	2	2	2
59	1	1	2	2	1	1	1	1	2	2	2	2	1	2	2	2	2	2	2	2	2	2	1	2	1	2	2	2	2	2	2	2	2	2	2	2	1	2	2	2	1	1	2	2	1	1	1	2	2
60	1	1	1	1	1	1	1	1	1	2	2	2	2	2	2	2	2	2	2	1	1	2	1	2	1	2	2	2	2	0	2	2	2	2	2	1	2	2	2	1	1	2	2	2	2	1	1	1	1
61	2	2	1	1	2	2	2	2	2	2	2	2	2	2	2	2	2	1	2	2	2	2	2	2	2	2	2	2	2	2	2	1	2	2	2	2	1	2	1	1	2	2	2	2	2	1	2	1	2
62	2	2	2	2	2	2	2	2	2	2	1	2	2	2	2	2	2	2	2	2	2	2	2	2	2	2	2	2	2	2	2	2	2	2	2	2	2	2	1	2	2	2	2	2	2	1	1	1	2
63	2	2	1	2	2	1	2	2	2	2	2	2	2	2	2	2	1	1	1	1	2	2	2	1	2	2	2	2	2	2	2	1	2	1	2	2	2	2	2	2	2	1	1	2	1	2	1	2	2
64	2	2	2	2	2	2	2	2	2	2	2	2	2	2	2	2	1	2	2	2	1	2	2	2	2	2	2	2	2	2	2	1	2	1	2	1	2	2	2	2	2	2	1	2	2	1	1	1	1
65	2	1	1	2	2	2	2	1	1	2	2	2	2	2	2	2	2	2	2	2	2	1	2	2	2	2	2	2	2	2	2	2	2	1	2	2	2	2	2	2	2	2	2	2	2	1	2	1	2
[truncated: 16 more columns]

## Sheet: RAND() function
Question	Correct Answer	Random-1	Random-1-Binary	Random-2	Random-2-Binary	Random-3	Random-3-Binary	Random-4	Random-4-Binary	Random-5	Random-5-Binary
1	D	B	0	B	0	B	0	B	0	E	0
2	C	C	1	E	0	B	0	A	0	A	0
3	D	C	0	D	1	C	0	A	0	E	0
4	C	D	0	D	0	B	0	D	0	E	0
5	A	D	0	A	1	B	0	E	0	B	0
6	B	E	0	C	0	B	1	E	0	D	0
7	B	A	0	B	1	D	0	D	0	C	0
8	C	C	1	A	0	E	0	D	0	D	0
9	C	E	0	A	0	D	0	D	0	B	0
10	A	A	1	A	1	B	0	A	1	D	0
11	C	D	0	B	0	C	1	D	0	D	0
12	B	C	0	E	0	E	0	B	1	E	0
13	B	D	0	C	0	D	0	B	1	A	0
14	E	C	0	B	0	C	0	E	1	B	0
15	D	B	0	B	0	E	0	C	0	D	1
16	B	D	0	B	1	B	1	C	0	E	0
17	E	D	0	E	1	A	0	B	0	A	0
18	B	E	0	B	1	A	0	E	0	B	1
19	C	C	1	A	0	A	0	E	0	B	0
20	B	D	0	B	1	E	0	D	0	C	0
21	B	B	1	B	1	D	0	B	1	E	0
22	B	C	0	D	0	E	0	C	0	D	0
23	B	D	0	C	0	B	1	A	0	C	0
24	C	E	0	B	0	B	0	E	0	A	0
25	E	A	0	B	0	D	0	B	0	C	0
26	E	E	1	E	1	D	0	B	0	C	0
27	E	A	0	B	0	C	0	D	0	A	0
28	C	D	0	B	0	B	0	D	0	D	0
29	A	A	1	D	0	A	1	B	0	B	0
30	C	E	0	C	1	D	0	B	0	B	0
31	D	B	0	B	0	D	1	A	0	A	0
32	C	A	0	B	0	E	0	D	0	D	0
33	B	B	1	B	1	B	1	A	0	A	0
34	D	D	1	A	0	B	0	E	0	D	1
35	E	E	1	A	0	C	0	D	0	C	0
36	D	B	0	B	0	A	0	B	0	E	0
37	A	B	0	E	0	C	0	C	0	E	0
38	B	B	1	B	1	B	1	B	1	B	1
39	D	E	0	B	0	C	0	B	0	B	0
40	E	A	0	E	1	B	0	C	0	D	0
41	A	C	0	E	0	D	0	E	0	A	1
42	C	E	0	C	1	C	1	C	1	C	1
43	E	E	1	A	0	A	0	E	1	C	0
44	D	E	0	E	0	B	0	B	0	D	1
45	C	E	0	B	0	A	0	D	0	D	0
46	D	A	0	E	0	B	0	D	1	B	0
47	E	E	1	D	0	B	0	E	1	A	0
48	D	D	1	B	0	B	0	D	1	B	0
49	C	A	0	D	0	B	0	A	0	B	0
50	A	A	1	E	0	A	1	B	0	B	0
51	E	D	0	E	1	E	1	A	0	D	0
52	B	D	0	B	1	C	0	C	0	C	0
53	C	E	0	B	0	A	0	E	0	E	0
54	E	A	0	D	0	C	0	C	0	B	0
55	E	E	1	C	0	D	0	B	0	E	1
56	D	D	1	A	0	D	1	E	0	D	1
57	D	A	0	A	0	D	1	C	0	C	0
58	C	D	0	E	0	E	0	D	0	A	0
59	B	C	0	B	1	B	1	A	0	E	0
60	C	B	0	E	0	C	1	B	0	A	0
61	A	E	0	B	0	E	0	C	0	E	0
62	E	D	0	B	0	E	1	A	0	C	0
63	C	B	0	B	0	A	0	E	0	A	0
64	D	E	0	B	0	C	0	E	0	D	1
65	B	A	0	E	0	E	0	E	0	B	1

## Sheet: Review Expert
MCQ_ID	Reviewer 1				Reviewer 2				Reviewer 3				Agreement	Final
	Validity	Clarity	Difficulty	Total	Validity	Clarity	Difficulty	Total	Validity	Clarity	Difficulty	Total		Agreement	Validity	Clarity	Difficulty	Total
1	2	2	1	5	2	2	1	5	2	2	1	5	5	Yes	2	2	1	5
2	2	2	2	6	2	2	2	6	2	2	2	6	6	Yes	2	2	2	6
3	2	2	1	5	2	2	1	5	2	2	1	5	5	Yes	2	2	1	5
4	2	2	1	5	2	2	2	6	2	2	2	6	5.66667	No	2	2	2	6
5	2	2	1	5	2	2	1	5	2	2	1	5	5	Yes	2	2	1	5
6	2	1	2	5	2	1	2	5	2	1	1	4	4.66667	No	2	1	2	5
7	2	2	2	6	2	2	2	6	2	2	2	6	6	Yes	2	2	2	6
8	2	2	2	6	2	2	2	6	2	2	2	6	6	Yes	2	2	2	6
9	2	2	2	6	2	2	2	6	2	2	2	6	6	Yes	2	2	2	6
10	2	2	2	6	2	2	1	5	2	1	1	4	5	No	2	2	1	5
11	2	2	2	6	2	2	2	6	2	2	2	6	6	Yes	2	2	2	6
12	2	2	1	5	2	2	1	5	2	2	1	5	5	Yes	2	2	1	5
13	2	2	2	6	2	2	2	6	2	2	2	6	6	Yes	2	2	2	6
14	2	1	2	5	2	1	2	5	2	2	2	6	5.33333	No	2	1	2	5
15	2	2	2	6	2	2	2	6	2	2	2	6	6	Yes	2	2	2	6
16	2	2	2	6	2	2	2	6	2	2	2	6	6	Yes	2	2	2	6
17	2	2	2	6	2	2	2	6	1	2	2	5	5.66667	No	2	2	2	6
18	2	2	2	6	2	2	2	6	2	2	2	6	6	Yes	2	2	2	6
19	2	2	2	6	2	2	2	6	2	2	2	6	6	Yes	2	2	2	6
20	2	2	1	5	2	2	1	5	2	2	1	5	5	Yes	2	2	1	5
21	2	2	1	5	2	2	1	5	2	2	1	5	5	Yes	2	2	1	5
22	2	2	2	6	2	2	2	6	2	2	2	6	6	Yes	2	2	2	6
23	2	2	1	5	2	2	1	5	2	2	1	5	5	Yes	2	2	1	5
24	2	2	2	6	2	2	2	6	2	2	2	6	6	Yes	2	2	2	6
25	2	2	2	6	2	2	2	6	2	2	2	6	6	Yes	2	2	2	6
26	2	2	1	5	2	2	1	5	2	2	1	5	5	Yes	2	2	1	5
27	2	2	1	5	2	2	1	5	2	2	1	5	5	Yes	2	2	1	5
28	2	2	1	5	2	2	1	5	2	2	1	5	5	Yes	2	2	1	5
29	2	2	2	6	2	2	2	6	2	2	2	6	6	Yes	2	2	2	6
30	2	2	2	6	2	2	2	6	2	2	2	6	6	Yes	2	2	2	6
31	2	2	2	6	2	2	2	6	2	2	2	6	6	Yes	2	2	2	6
32	2	2	2	6	2	2	2	6	2	2	2	6	6	Yes	2	2	2	6
33	2	2	2	6	2	2	2	6	2	2	2	6	6	Yes	2	2	2	6
34	2	2	2	6	2	2	2	6	2	2	2	6	6	Yes	2	2	2	6
35	2	2	2	6	2	2	2	6	2	2	2	6	6	Yes	2	2	2	6
36	2	2	2	6	2	2	2	6	2	2	2	6	6	Yes	2	2	2	6
37	2	2	1	5	2	2	1	5	2	2	1	5	5	Yes	2	2	1	5
38	2	2	1	5	2	2	1	5	2	2	1	5	5	Yes	2	2	1	5
39	2	2	1	5	2	2	1	5	2	2	1	5	5	Yes	2	2	1	5
40	2	2	2	6	2	2	2	6	2	2	2	6	6	Yes	2	2	2	6
41	2	2	2	6	2	2	2	6	2	2	2	6	6	Yes	2	2	2	6
42	2	2	2	6	2	2	2	6	2	2	1	5	5.66667	No	2	2	2	6
43	2	2	1	5	2	2	1	5	2	2	1	5	5	Yes	2	2	1	5
44	2	2	2	6	2	2	2	6	2	2	2	6	6	Yes	2	2	2	6
45	2	2	2	6	2	2	2	6	2	2	2	6	6	Yes	2	2	2	6
46	2	2	1	5	2	2	1	5	2	2	1	5	5	Yes	2	2	1	5
47	2	2	2	6	2	2	2	6	2	1	2	5	5.66667	No	2	2	2	6
48	2	2	1	5	2	2	1	5	2	2	1	5	5	Yes	2	2	1	5
49	2	2	2	6	2	2	2	6	2	2	2	6	6	Yes	2	2	2	6
50	2	2	2	6	2	2	2	6	2	2	2	6	6	Yes	2	2	2	6
51	2	2	2	6	2	2	2	6	2	2	2	6	6	Yes	2	2	2	6
52	2	2	2	6	2	2	2	6	2	2	2	6	6	Yes	2	2	2	6
53	2	2	2	6	2	2	2	6	2	2	2	6	6	Yes	2	2	2	6
54	2	2	2	6	2	2	2	6	2	2	2	6	6	Yes	2	2	2	6
55	2	2	2	6	2	2	2	6	2	2	2	6	6	Yes	2	2	2	6
56	2	2	2	6	2	2	2	6	2	2	2	6	6	Yes	2	2	2	6
57	1	1	2	4	1	1	2	4	1	1	2	4	4	Yes	1	1	2	4
58	2	2	2	6	2	2	2	6	2	2	2	6	6	Yes	2	2	2	6
59	2	2	1	5	2	2	1	5	2	2	1	5	5	Yes	2	2	1	5
60	2	2	1	5	2	2	1	5	2	2	1	5	5	Yes	2	2	1	5
61	2	2	1	5	2	2	1	5	2	2	1	5	5	Yes	2	2	1	5
62	2	2	2	6	2	2	2	6	2	2	2	6	6	Yes	2	2	2	6
63	2	2	2	6	2	2	2	6	2	2	2	6	6	Yes	2	2	2	6
64	2	2	2	6	2	2	2	6	2	2	2	6	6	Yes	2	2	2	6
65	2	2	2	6	2	2	2	6	2	2	2	6	6	Yes	2	2	2	6
