# Supplementary material for: Comparative Evaluation of Large Language Models for Medical Education: Performance Analysis in Urinary System Histology.
Source: Research Square preprint supplement (doi:10.21203/rs.3.rs-6186253/v1), 2025-03-13
Supplement: Supplementary file 1 [file d8b8bf891f4e60a1d704520e.pdf]

## Appendix 4. Clinical Scenario Evaluation Framework

| Dimension   | Score Range | Evaluation Criteria                                                                                                                                                                                                                                                                                    |
|-------------|-------------|--------------------------------------------------------------------------------------------------------------------------------------------------------------------------------------------------------------------------------------------------------------------------------------------------------|
| Quality     | 0-5         | 0: Did not respond to prompt as instructed<br>1: Minimal adherence to instructions<br>2: Partial adherence with significant omissions<br>3: Adequate adherence with minor omissions<br>4: Strong adherence with complete response<br>5: Exemplary adherence exceeding expectations                     |
| Complexity  | 0-5         | 0: Completely inappropriate for medical students<br>1: Significantly below appropriate complexity<br>2: Somewhat below appropriate complexity<br>3: Appropriate complexity for year 1 medical students<br>4: Challenging but appropriate complexity<br>5: Optimal complexity with graduated difficulty |
| Relevance   | 0-5         | 0: No relation to Histology Urinary system course objectives<br>1: Minimal relevance to course objectives<br>2: Partial relevance with significant gaps<br>3: Adequate relevance to core objectives<br>4: Strong relevance to multiple objectives<br>5: Comprehensive relevance to course curriculum   |
| Correctness | 0-5         | 0: Contains critical factual errors<br>1: Contains major factual inaccuracies<br>2: Contains several minor factual errors<br>3: Generally accurate with isolated minor errors<br>4: Highly accurate with negligible errors<br>5: Completely accurate with current medical knowledge                    |
| Variety     | 0-5         | 0: Complete repetition of previous responses<br>1: Minimal variation from previous responses<br>2: Limited variation in approach or content<br>3: Moderate variation from previous responses<br>4: Substantial variation in approach and content<br>5: Complete originality across all responses       |

### 1. If the Question Is “Detached” from the Scenario

#### Situation

- The scenario (e.g., about a 20-year-old with elbow pain) is followed by an MCQ that **references a completely different** patient or condition (unrelated to the original scenario).
- Essentially, the question **does not flow** from the scenario, or it addresses an entirely different clinical context.

#### Rubric Implications

1. **Quality of Response to the Prompt:** The scenario/Q set is not internally consistent; it fails to follow instructions requiring it to be a cohesive set. This likely lowers the score.
2. **Complexity:** Might still be moderate or adequate, but the disjointedness suggests poor structure.

3. **Relevance:** The question is not relevant to the scenario's content.
4. **Correctness:** The question could still be factually correct, but it's off-topic.
5. **Variety:** If the mismatch is frequent or repeated, variety may also be low.

### Likely Score Range

- **1–2** if the question is severely off-topic or the scenario is no longer coherent.
  - If there are *some* relevant details but an obvious mismatch, possibly a **3** at best.
  - **0** only if it's completely nonsensical or no meaningful scenario is provided at all.
- 

## 2. If the Scenario “Gives Away” the Answers

### Situation

- The scenario is so detailed or **explicit** that the correct answer choice becomes **obvious** (e.g., “The patient’s troponin levels are elevated, indicating an MI,” and then an MCQ “What is the most likely cause of chest pain?” with “Myocardial infarction” as an option).
- This can mean the item lacks challenge/complexity.

### Rubric Implications

1. **Quality of Response to Prompt:** The scenario addresses the topic, but might not meet typical exam standards because it's leading students too strongly.
2. **Complexity:** If the question is trivialized by giving away the key detail, complexity is low—there's not much reasoning required.
3. **Relevance:** Could still be relevant, but it's **too easy** or telegraphed.
4. **Correctness:** The scenario might still be correct, but it's not testing knowledge thoroughly.
5. **Variety:** If all questions follow the same pattern of giving away the answer, it reduces variety.

### Likely Score Range

- Possibly **3** (adequate) if the scenario is at least correct and on-topic, but **some** points deducted for poor test utility.
  - Could be **4** if everything else is strong (the text is relevant, well-structured, correct) but the question is too transparent.
  - Rarely a **5**, because an ideal question typically requires some reasoning.
- 

## 3. If the Answer Choices (1–2) Are Not Correct or Not the Best

### Situation

- The item's MCQ or scenario has flawed answer choices:
  - Maybe multiple answers appear “correct,” or the provided “correct answer” is **actually incorrect** or suboptimal.
  - Or the question is poorly constructed, so none of the offered choices truly fits.

## Rubric Implications

1. **Quality of Response to the Prompt:** The question itself fails to meet typical standards for clarity.
2. **Complexity:** Could still be complex or trivial. The main problem is accuracy.
3. **Relevance:** Possibly still relevant to the scenario, but overshadowed by correctness problems.
4. **Correctness:** This is **majorly** impacted. If the correct answer choice is not truly correct, it's a factual error.
5. **Variety:** The scenario might be repeated or might not; the bigger issue is correctness.

## Likely Score Range

- **1–2** if the entire question or answer set is flawed, but you can see some attempt to be on-topic.
  - **0** if it is entirely unusable—completely missing the mark in both the scenario and question.
  - **3–4** if only **minor** inaccuracies are there (e.g., slight wording confusion). But generally, major correctness issues push the score lower.
- 

## Overall Guidance for the 0–5 Rating

- **0:** Almost no redeeming qualities (completely off-topic, incorrect, or nonsensical).
- **1–2:** Very poor or weak. Severe mismatch, major factual errors, or scenario-question disconnect.
- **3:** Adequate. Generally coherent and correct but with noticeable flaws like partial irrelevance or lacking complexity.
- **4:** Good. Mostly correct, relevant, structured. Possibly too easy or has small mistakes but otherwise strong.
- **5:** Excellent. Meets high-quality standards in all rubrics—on-topic, challenging but correct, and well-varied from prior attempts.
