# Supplementary material for: Comparative Evaluation of Large Language Models for Medical Education: Performance Analysis in Urinary System Histology.
Source: Research Square preprint supplement (doi:10.21203/rs.3.rs-6186253/v1), 2025-03-13
Supplement: Supplementary file 2 [file 4de6d8c74bf2b775f64d924d.xlsx]

## Sheet: Dr Ebrahimi
Number	Topic	Item	Item_Name	Claude 3.5_Quality	Claude 3.5_Complexity	Claude 3.5_Relevance	Claude 3.5_Correctness	Claude 3.5_Variety	Claude 3.7_Quality	Claude 3.7_Complexity	Claude 3.7_Relevance	Claude 3.7_Correctness	Claude 3.7_Variety	Claude 3.7-E_Quality	Claude 3.7-E_Complexity	Claude 3.7-E_Relevance	Claude 3.7-E_Correctness	Claude 3.7-E_Variety	ChatGPT o1_Quality	ChatGPT o1_Complexity	ChatGPT o1_Relevance	ChatGPT o1_Correctness	ChatGPT o1_Variety	ChatGPT o3-H_Quality	ChatGPT o3-H_Complexity	ChatGPT o3-H_Relevance	ChatGPT o3-H_Correctness	ChatGPT o3-H_Variety	ChatGPT 4.5_Quality	ChatGPT 4.5_Complexity	ChatGPT 4.5_Relevance	ChatGPT 4.5_Correctness	ChatGPT 4.5_Variety	DeepSeek_Quality	DeepSeek_Complexity	DeepSeek_Relevance	DeepSeek_Correctness	DeepSeek_Variety	DeepSeek-R1_Quality	DeepSeek-R1_Complexity	DeepSeek-R1_Relevance	DeepSeek-R1_Correctness	DeepSeek-R1_Variety	Gemini 2_Quality	Gemini 2_Complexity	Gemini 2_Relevance	Gemini 2_Correctness	Gemini 2_Variety	Qwen 2.5-M_Quality
1	Renal corpuscle	1.1	Scenario	5	5	5	4	5	4	5	4	4	5	4	5	3	5	5	1	1	4	5	2	1	2	5	5	2	5	5	3	5	5	3	2	5	5	4	4	4	5	4	3	2	4	2	5	5	4
2	Renal corpuscle	1.1	Q1	4	5	5	5	5	5	4	5	5	5	4	3	5	4	4	4	4	5	5	5	2	2	5	5	2	4	5	5	5	5	1	2	5	4	3	4	3	5	5	5	1	1	1	1	1	5
3	Renal corpuscle	1.1	Q2	4	4	5	4	5	5	5	5	5	5	4	5	3	5	5	4	5	5	5	5	2	2	5	4	1	4	5	5	4	5	1	3	5	5	3	2	2	5	5	3	3	2	4	3	3	4
4	Renal corpuscle	1.1	Q3	5	4	5	5	5	4	4	5	5	5	5	5	5	5	5	4	5	5	5	4	1	2	4	5	2	2	1	2	5	5	2	2	4	5	3	5	5	3	5	5	3	3	2	5	5	4
5	Renal corpuscle	1.2	Scenario	4	5	5	3	4	4	5	3	5	4	5	5	5	5	5	2	2	5	5	2	1	2	5	5	2	2	2	3	5	2	5	5	5	5	3	3	3	5	4	4	3	3	2	4	4	5
6	Renal corpuscle	1.2	Q1	4	5	5	2	5	5	4	5	5	5	4	3	5	4	5	4	5	4	5	5	1	1	5	5	2	2	2	5	5	3	4	4	2	5	3	1	2	5	5	3	1	4	2	5	5	1
7	Renal corpuscle	1.2	Q2	4	5	5	4	4	1	1	1	2	1	5	4	5	4	5	4	2	5	5	3	3	4	5	5	4	2	2	5	5	3	3	4	5	4	4	5	4	5	5	5	1	4	2	5	5	1
8	Renal corpuscle	1.2	Q3	5	5	5	5	5	4	4	5	5	1	4	5	4	5	4	4	5	4	5	4	3	3	5	4	3	2	2	5	5	3	3	4	4	5	3	1	2	2	5	5	2	4	1	1	5	1
9	Renal corpuscle	1.3	Scenario	5	5	4	5	3	4	5	4	5	2	5	4	4	5	4	2	2	5	4	2	1	2	5	5	3	4	2	3	5	2	1	2	3	4	4	2	4	2	5	4	2	4	2	5	4	5
10	Renal corpuscle	1.3	Q1	3	5	4	5	4	4	3	5	3	2	4	3	5	4	2	1	2	5	5	3	2	2	5	5	2	2	2	3	5	2	2	2	2	5	3	2	2	2	4	5	2	4	3	5	4	4
11	Renal corpuscle	1.3	Q2	2	5	5	5	3	1	1	1	1	1	5	5	5	5	5	1	3	5	5	3	4	3	4	5	3	4	5	5	5	5	4	4	2	5	3	1	3	2	4	5	2	4	2	4	4	4
12	Renal corpuscle	1.3	Q3	4	5	5	2	5	4	4	5	4	2	4	5	5	5	5	2	3	5	5	3	4	3	5	5	3	2	1	2	5	4	3	4	1	5	4	1	3	2	5	5	2	4	2	5	4	5
13	Nephron	2.1	Scenario	4	5	5	4	3	5	4	5	5	4	4	5	4	5	5	1	2	5	5	3	1	2	5	5	5	4	2	3	5	4	4	5	3	5	5	2	4	2	5	4	2	4	3	5	4	5
14	Nephron	2.1	Q1	5	4	5	5	4	4	5	5	1	5	5	5	5	5	5	1	1	4	5	3	1	1	1	1	1	2	2	5	5	2	4	4	5	5	5	2	2	4	5	2	1	3	5	5	5	1
15	Nephron	2.1	Q2	5	5	5	4	5	4	5	5	5	5	4	4	5	5	5	2	1	5	5	4	1	2	3	4	2	4	5	5	0	5	5	4	3	5	5	4	3	5	5	3	2	3	2	4	4	1
16	Nephron	2.1	Q3	5	4	5	5	4	1	1	1	1	1	4	5	5	4	5	1	1	5	5	3	1	2	3	4	1	4	4	5	5	5	4	3	5	5	4	1	1	4	5	2	4	3	5	5	4	4
17	Nephron	2.2	Scenario	5	5	5	5	5	5	2	5	5	2	5	5	5	5	5	4	5	5	5	5	1	2	5	5	3	4	2	3	5	2	4	3	2	4	4	3	4	2	5	5	3	3	5	5	4	3
18	Nephron	2.2	Q1	3	5	4	4	4	5	5	5	5	5	4	5	5	5	5	4	4	4	5	4	1	2	5	4	3	2	2	4	5	2	4	3	2	0	4	1	2	2	4	5	4	3	4	5	5	1
19	Nephron	2.2	Q2	4	5	5	5	5	5	5	5	5	5	2	5	2	5	5	4	5	5	5	5	1	2	5	5	2	4	5	5	5	5	5	3	2	5	4	4	3	4	4	3	4	3	4	5	4	4
20	Nephron	2.2	Q3	4	5	5	5	5	5	5	3	4	5	5	5	5	5	5	1	1	5	5	3	1	2	5	4	3	2	1	2	5	2	4	3	5	4	4	2	2	2	5	5	4	3	5	5	4	1
21	Nephron	2.3	Scenario	3	5	5	4	4	4	5	5	5	5	5	5	4	5	5	1	2	5	5	3	1	2	4	5	2	4	5	4	5	5	4	3	2	5	4	2	4	1	5	5	5	4	5	5	5	5
22	Nephron	2.3	Q1	1	2	5	2	3	4	3	5	5	2	5	5	5	5	2	1	1	4	5	3	1	2	5	5	2	2	2	5	5	3	1	2	2	5	2	4	3	4	5	5	4	3	5	5	5	1
23	Nephron	2.3	Q2	3	5	5	5	4	4	5	5	3	5	4	2	4	5	5	4	4	5	5	5	1	2	5	5	2	5	5	5	5	2	1	2	2	4	2	4	5	5	5	4	3	3	4	5	5	4
24	Nephron	2.3	Q3	4	4	5	4	4	2	2	3	5	2	4	4	3	4	4	1	1	5	4	1	1	2	5	5	2	2	1	2	5	5	3	3	5	5	5	1	2	3	5	5	4	3	5	5	5	4
25	Lower urinary system	3.1	Scenario	5	5	5	4	5	5	5	5	5	5	4	5	4	5	5	1	2	5	4	2	4	4	5	5	5	3	5	5	5	5	1	2	5	4	2	2	5	4	3	5	5	4	5	5	5	5
26	Lower urinary system	3.1	Q1	4	5	5	5	5	4	5	5	5	5	4	5	5	5	5	2	2	4	5	3	4	4	5	5	5	2	2	5	5	2	1	2	5	5	2	1	2	5	5	3	4	3	5	5	4	1
27	Lower urinary system	3.1	Q2	4	5	5	5	4	4	4	5	5	5	4	5	5	5	4	4	4	5	5	5	1	2	5	5	1	2	2	4	5	3	1	2	2	5	2	4	3	5	5	5	4	3	4	4	5	4
28	Lower urinary system	3.1	Q3	5	5	5	5	5	4	5	5	1	5	5	2	5	4	3	1	1	5	5	2	4	4	5	5	5	2	2	4	5	3	5	4	4	5	5	5	5	5	5	5	4	4	5	2	5	4
29	Lower urinary system	3.2	Scenario	4	5	5	5	5	4	5	3	5	5	5	5	5	5	2	1	2	5	5	2	4	4	5	5	5	5	5	4	5	2	4	5	5	4	5	1	5	2	5	5	5	4	5	5	4	3
30	Lower urinary system	3.2	Q1	4	5	5	5	5	4	5	2	1	5	4	5	5	5	3	1	1	5	5	1	1	2	5	5	2	4	5	5	5	5	4	4	5	5	5	5	3	5	5	3	4	3	5	5	5	2
31	Lower urinary system	3.2	Q2	4	5	4	5	5	4	4	2	4	5	4	4	5	5	5	1	2	5	5	3	2	2	2	5	5	4	5	4	5	5	5	4	1	5	5	2	4	3	5	4	4	3	5	5	5	4
32	Lower urinary system	3.2	Q3	4	5	5	5	5	1	1	1	1	1	4	5	5	5	2	1	3	5	5	2	1	2	2	5	5	4	5	5	5	5	3	3	5	5	2	1	2	2	5	4	4	3	5	2	5	2
33	Lower urinary system	3.3	Scenario	5	5	5	5	4	1	2	5	4	2	5	5	5	5	2	1	3	5	5	2	4	5	5	4	5	5	5	5	5	3	3	3	2	5	4	4	3	5	4	5	5	4	5	5	5	5
34	Lower urinary system	3.3	Q1	4	5	5	5	5	1	2	5	5	2	4	5	4	5	2	2	2	5	5	1	4	3	4	5	5	2	2	5	5	2	3	3	2	5	3	4	3	5	5	5	4	3	5	5	4	1
35	Lower urinary system	3.3	Q2	4	5	5	5	5	5	5	5	5	4	2	5	1	5	5	4	5	5	5	4	2	2	2	5	5	5	2	5	5	4	1	2	2	5	3	1	2	2	5	5	5	4	5	5	5	4
36	Lower urinary system	3.3	Q3	4	2	5	2	5	2	2	5	5	2	5	3	5	5	3	3	1	0	1	1	3	2	4	2	5	1	1	1	5	1	2	2	4	5	3	4	4	5	5	5	4	3	4	5	3	4
[truncated: 19 more columns]

## Sheet: Dr Szabo
Number	Topic	Item	Item_Name	Claude 3.5_Quality	Claude 3.5_Complexity	Claude 3.5_Relevance	Claude 3.5_Correctness	Claude 3.5_Variety	Claude 3.7_Quality	Claude 3.7_Complexity	Claude 3.7_Relevance	Claude 3.7_Correctness	Claude 3.7_Variety	Claude 3.7-E_Quality	Claude 3.7-E_Complexity	Claude 3.7-E_Relevance	Claude 3.7-E_Correctness	Claude 3.7-E_Variety	ChatGPT o1_Quality	ChatGPT o1_Complexity	ChatGPT o1_Relevance	ChatGPT o1_Correctness	ChatGPT o1_Variety	ChatGPT o3-H-H_Quality	ChatGPT o3-H-H_Complexity	ChatGPT o3-H-H_Relevance	ChatGPT o3-H-H_Correctness	ChatGPT o3-H-H_Variety	DeepSeek_Quality	DeepSeek_Complexity	DeepSeek_Relevance	DeepSeek_Correctness	DeepSeek_Variety	DeepSeek-R1_Quality	DeepSeek-R1_Complexity	DeepSeek-R1_Relevance	DeepSeek-R1_Correctness	DeepSeek-R1_Variety	Gemini 2_Quality	Gemini 2_Complexity	Gemini 2_Relevance	Gemini 2_Correctness	Gemini 2_Variety	Qwen 2.5-M_Quality	Qwen 2.5-M_Complexity	Qwen 2.5-M_Relevance	Qwen 2.5-M_Correctness	Qwen 2.5-M_Variety	QwQ-3B_Quality
1	Renal corpuscle	1.1	Scenario	5	5	5	4	5	4	5	4	4	5	5	5	4	5	5	1	1	5	5	2	1	2	5	5	2	3	3	5	5	4	4	4	5	4	4	2	4	2	5	5	5	5	2	5	5	5
2	Renal corpuscle	1.1	Q1	4	5	5	5	5	4	4	5	5	5	4	3	5	4	4	4	5	5	5	5	1	2	5	5	2	1	2	5	5	3	4	3	5	5	5	1	1	1	1	1	4	3	2	5	5	1
3	Renal corpuscle	1.1	Q2	4	4	5	4	5	5	5	5	5	5	4	5	3	5	5	4	5	5	5	5	1	2	5	5	2	1	2	5	5	3	1	2	5	5	3	3	3	5	3	4	4	3	5	5	4	2
4	Renal corpuscle	1.1	Q3	5	5	5	5	5	4	4	5	5	5	4	5	5	5	5	4	5	5	5	5	1	2	5	5	2	1	2	5	5	3	4	4	3	5	5	2	3	2	5	5	4	3	2	5	3	2
5	Renal corpuscle	1.2	Scenario	4	5	5	4	4	4	5	4	5	4	5	5	5	5	5	2	2	5	5	2	1	2	5	5	2	5	4	5	5	3	3	3	5	5	4	3	3	2	5	4	5	5	4	5	5	2
6	Renal corpuscle	1.2	Q1	4	5	5	2	5	4	4	5	5	5	4	4	5	5	5	4	5	5	5	5	1	2	5	5	2	4	4	3	5	3	1	2	5	5	3	2	4	2	5	5	1	2	2	5	2	2
7	Renal corpuscle	1.2	Q2	4	5	5	4	5	1	1	1	1	1	5	5	5	5	5	4	2	5	5	3	3	3	5	5	4	3	3	5	5	3	5	4	5	5	4	2	4	2	5	5	1	2	5	1	2	2
8	Renal corpuscle	1.2	Q3	4	5	5	5	5	4	4	5	5	2	4	4	4	5	4	4	5	5	5	5	3	3	5	5	4	3	4	3	5	3	1	2	2	5	5	2	4	2	1	4	1	2	4	5	5	2
9	Renal corpuscle	1.3	Scenario	5	5	5	5	4	4	5	4	5	2	5	5	4	5	5	1	2	5	4	2	1	2	5	5	2	1	2	2	5	3	2	4	2	5	5	2	4	2	5	4	5	5	2	5	5	4
10	Renal corpuscle	1.3	Q1	4	5	5	5	4	4	3	5	3	2	4	3	5	4	2	1	2	5	5	3	1	2	5	5	2	1	2	2	5	3	1	2	2	5	5	2	4	2	5	4	4	5	2	5	5	2
11	Renal corpuscle	1.3	Q2	2	5	5	5	4	1	1	1	1	1	5	5	5	5	5	1	2	5	5	3	4	3	5	5	3	4	4	2	5	3	1	2	2	5	5	2	4	2	5	4	4	3	5	5	4	2
12	Renal corpuscle	1.3	Q3	4	5	5	2	5	4	4	5	5	2	4	5	5	5	5	2	3	5	5	3	4	3	5	5	3	4	4	2	5	3	1	2	2	5	5	2	4	2	5	4	4	4	5	5	4	2
13	Nephron	2.1	Scenario	5	5	5	4	4	5	5	5	5	5	5	5	4	5	5	1	2	5	5	3	1	2	5	5	5	5	5	3	5	5	2	4	2	5	5	2	4	3	5	4	5	5	3	5	4	0
14	Nephron	2.1	Q1	5	5	5	5	4	4	5	5	1	5	5	5	5	5	5	1	2	5	5	3	1	1	1	1	1	4	4	5	5	5	1	2	5	5	2	1	3	5	5	4	1	2	5	3	4	2
15	Nephron	2.1	Q2	5	5	5	5	5	4	5	5	5	5	4	4	5	5	5	1	1	5	5	3	1	2	3	5	2	5	4	3	5	4	4	3	5	5	3	2	3	2	5	4	1	2	3	3	4	1
16	Nephron	2.1	Q3	5	5	5	5	5	1	1	1	1	1	4	5	5	5	5	1	1	5	5	3	1	2	3	5	1	4	3	5	5	4	1	2	5	5	2	4	3	5	5	4	4	5	2	5	5	4
17	Nephron	2.2	Scenario	5	5	5	5	5	5	2	5	5	2	5	5	5	5	5	4	5	5	4	5	1	2	5	5	3	4	3	3	4	4	2	4	2	5	5	3	3	5	5	5	3	2	2	5	4	4
18	Nephron	2.2	Q1	4	5	5	5	4	5	5	5	5	5	4	5	5	5	5	4	5	5	5	4	1	2	5	5	3	4	3	2	0	4	1	2	2	5	5	4	3	5	5	5	1	2	2	5	4	2
19	Nephron	2.2	Q2	4	5	5	5	5	5	5	5	5	5	2	5	2	5	5	4	5	5	5	5	1	2	5	5	2	5	3	2	5	4	4	3	5	5	3	4	3	5	5	5	4	3	5	5	4	5
20	Nephron	2.2	Q3	4	5	5	5	5	5	5	3	5	5	5	5	5	5	5	1	1	5	5	3	1	2	5	5	2	4	3	5	5	4	1	2	2	5	5	4	3	5	5	5	1	2	5	5	4	2
21	Nephron	2.3	Scenario	3	5	5	4	4	4	5	5	5	5	5	5	5	5	5	1	2	5	5	3	1	2	5	5	2	4	3	2	5	4	2	4	2	5	5	5	4	5	5	5	5	5	5	5	5	4
22	Nephron	2.3	Q1	1	2	5	2	3	4	3	5	5	2	5	5	5	5	2	1	1	5	5	3	1	2	5	5	2	1	2	2	5	2	4	3	5	5	5	4	3	5	5	5	1	2	2	5	5	2
23	Nephron	2.3	Q2	4	5	5	5	5	4	5	5	2	5	4	2	5	5	5	4	5	5	5	5	1	2	5	5	2	1	2	2	5	2	4	5	5	5	5	3	3	5	5	5	4	5	5	5	5	4
24	Nephron	2.3	Q3	4	5	5	5	4	2	2	3	5	2	4	4	4	4	4	1	1	5	5	1	1	2	5	5	2	3	3	5	5	5	1	2	2	5	5	4	3	5	5	5	4	5	2	5	5	2
25	Lower urinary system	3.1	Scenario	5	5	5	5	5	5	5	5	5	5	4	5	4	5	5	1	2	5	5	2	4	4	5	5	5	1	2	5	5	2	2	4	4	3	5	5	4	5	5	5	5	5	5	5	5	3
26	Lower urinary system	3.1	Q1	4	5	5	5	5	4	4	5	5	5	4	5	5	5	5	1	2	5	5	3	4	4	5	5	5	1	2	5	5	2	1	2	5	5	3	4	3	5	5	4	1	2	5	5	2	0
27	Lower urinary system	3.1	Q2	4	5	5	5	5	4	4	5	5	5	4	5	5	5	5	4	5	5	5	5	1	2	5	5	2	1	2	2	5	2	4	3	5	5	5	4	3	5	5	5	4	3	5	5	5	0
28	Lower urinary system	3.1	Q3	5	5	5	5	5	4	5	5	1	5	5	2	5	5	3	1	1	5	5	2	4	4	5	5	5	4	4	5	5	5	5	5	5	5	5	4	4	5	2	5	5	5	2	5	5	0
29	Lower urinary system	3.2	Scenario	5	5	5	5	5	4	5	3	5	5	5	5	5	5	2	1	2	5	5	2	4	4	5	5	5	5	5	5	5	5	1	5	2	5	5	5	4	5	5	5	3	3	5	3	3	4
30	Lower urinary system	3.2	Q1	4	5	5	5	5	4	5	2	1	5	4	5	5	5	3	1	2	5	5	1	1	2	5	5	2	4	4	5	5	5	5	3	5	5	3	4	3	5	5	5	1	2	5	4	2	2
31	Lower urinary system	3.2	Q2	4	5	5	5	5	4	4	2	5	5	4	4	5	5	5	1	2	5	5	3	1	2	2	5	5	5	4	2	5	5	2	4	2	5	5	4	3	5	5	5	4	3	5	5	5	5
32	Lower urinary system	3.2	Q3	4	5	5	5	5	1	1	1	1	1	4	5	5	5	2	1	2	5	5	2	1	2	2	5	5	3	3	5	5	2	1	2	2	5	4	4	3	5	2	5	2	1	1	1	1	0
33	Lower urinary system	3.3	Scenario	5	5	5	5	5	1	2	5	5	2	5	5	5	5	2	1	2	5	5	2	5	5	5	5	5	3	3	2	5	4	4	3	5	5	5	5	4	5	5	5	5	5	5	5	5	3
34	Lower urinary system	3.3	Q1	4	5	5	5	5	1	2	5	5	2	4	5	5	5	2	1	2	5	5	2	4	3	5	5	5	3	3	2	5	4	4	3	5	5	5	4	3	5	5	5	1	2	5	5	2	2
35	Lower urinary system	3.3	Q2	4	5	5	5	5	5	4	5	5	4	2	5	2	5	5	4	5	5	5	5	1	2	2	5	5	1	2	2	5	3	1	2	2	5	5	4	4	5	5	5	4	3	5	5	3	2
36	Lower urinary system	3.3	Q3	4	2	5	2	5	2	2	5	5	2	5	3	5	5	3	3	2	3	3	5	4	4	5	0	5	1	2	4	5	3	4	4	5	5	5	4	3	5	5	3	4	3	3	5	5	2
[truncated: 19 more columns]

## Sheet: Final
Number	Topic	Item	Item_Name	Claude 3.5_Quality	Claude 3.5_Complexity	Claude 3.5_Relevance	Claude 3.5_Correctness	Claude 3.5_Variety	Claude 3.7_Quality	Claude 3.7_Complexity	Claude 3.7_Relevance	Claude 3.7_Correctness	Claude 3.7_Variety	Claude 3.7-E_Quality	Claude 3.7-E_Complexity	Claude 3.7-E_Relevance	Claude 3.7-E_Correctness	Claude 3.7-E_Variety	ChatGPT o1_Quality	ChatGPT o1_Complexity	ChatGPT o1_Relevance	ChatGPT o1_Correctness	ChatGPT o1_Variety	ChatGPT o3-H_Quality	ChatGPT o3-H_Complexity	ChatGPT o3-H_Relevance	ChatGPT o3-H_Correctness	ChatGPT o3-H_Variety	DeepSeek_Quality	DeepSeek_Complexity	DeepSeek_Relevance	DeepSeek_Correctness	DeepSeek_Variety	DeepSeek-R1_Quality	DeepSeek-R1_Complexity	DeepSeek-R1_Relevance	DeepSeek-R1_Correctness	DeepSeek-R1_Variety	Gemini 2_Quality	Gemini 2_Complexity	Gemini 2_Relevance	Gemini 2_Correctness	Gemini 2_Variety	Qwen 2.5-M_Quality	Qwen 2.5-M_Complexity	Qwen 2.5-M_Relevance	Qwen 2.5-M_Correctness	Qwen 2.5-M_Variety	Grok 3_Quality
1	Renal corpuscle	1.1	Scenario	5	5	5	4	5	4	5	4	4	5	4	5	3	5	5	1	1	5	5	2	1	2	5	5	2	3	3	5	5	4	4	4	5	4	4	2	4	2	5	5	5	5	2	5	5	2
2	Renal corpuscle	1.1	Q1	4	5	5	5	5	5	4	5	5	5	4	3	5	4	4	4	5	5	5	5	2	2	5	5	2	1	2	5	4	3	4	3	5	5	5	1	1	1	1	1	5	3	2	5	5	2
3	Renal corpuscle	1.1	Q2	4	4	5	4	5	5	5	5	5	5	4	5	3	5	5	4	5	5	5	5	2	2	5	4	2	1	2	5	5	3	1	2	5	5	3	3	2	4	3	4	4	3	5	5	4	2
4	Renal corpuscle	1.1	Q3	5	5	5	5	5	4	4	5	5	5	4	5	5	5	5	4	5	5	5	5	1	2	5	5	2	2	2	4	5	3	5	5	3	5	5	3	3	2	5	5	4	3	2	5	3	3
5	Renal corpuscle	1.2	Scenario	4	5	5	3	4	4	5	3	5	4	5	5	5	5	5	2	2	5	5	2	1	2	5	5	2	5	4	5	5	3	3	3	5	4	4	3	3	2	4	4	5	5	4	5	5	4
6	Renal corpuscle	1.2	Q1	4	5	5	2	5	5	4	5	5	5	4	3	5	5	5	4	5	5	5	5	1	1	5	5	2	4	4	3	5	3	1	2	5	5	3	2	4	2	5	5	1	2	2	5	2	1
7	Renal corpuscle	1.2	Q2	4	5	5	4	4	1	1	1	1	1	5	5	5	5	5	4	2	5	5	3	3	4	5	5	4	3	4	5	4	3	5	4	5	5	4	1	4	2	5	5	1	2	5	1	2	2
8	Renal corpuscle	1.2	Q3	5	5	5	5	5	4	4	5	5	2	4	5	4	5	4	4	5	4	5	5	3	3	5	5	4	3	4	4	5	3	1	2	2	5	5	2	4	2	1	4	1	1	4	5	5	1
9	Renal corpuscle	1.3	Scenario	5	5	4	5	3	4	5	4	5	2	5	5	4	5	4	2	2	5	4	2	1	2	5	5	3	1	2	3	5	4	2	4	2	5	5	2	4	2	5	4	5	5	2	5	5	4
10	Renal corpuscle	1.3	Q1	3	5	5	5	4	4	3	5	3	2	4	3	5	4	2	1	2	5	5	3	2	2	5	5	2	2	2	2	5	3	2	2	2	4	5	2	4	2	5	4	4	4	2	5	4	2
11	Renal corpuscle	1.3	Q2	2	5	5	5	4	1	1	1	1	1	5	5	5	5	5	1	2	5	5	3	4	3	5	5	3	4	4	2	5	3	1	3	2	4	5	2	4	2	5	4	4	3	4	5	4	3
12	Renal corpuscle	1.3	Q3	4	5	5	2	5	4	4	5	4	2	4	5	5	5	5	2	3	5	5	3	4	3	5	5	3	3	4	2	5	3	1	3	2	5	5	2	4	2	5	4	4	4	4	5	4	3
13	Nephron	2.1	Scenario	4	5	5	4	4	5	4	5	5	4	4	5	4	5	5	1	2	5	5	3	1	2	5	5	5	5	5	3	5	5	2	4	2	5	5	2	4	3	5	4	5	5	3	5	5	3
14	Nephron	2.1	Q1	5	4	5	5	4	4	5	5	1	5	5	5	5	5	5	1	2	5	5	3	1	1	1	1	1	4	4	5	5	5	1	2	4	5	2	1	3	5	5	5	1	2	5	3	5	2
15	Nephron	2.1	Q2	5	5	5	5	5	4	5	5	5	5	4	4	5	5	5	2	1	5	5	3	1	2	3	5	2	5	4	3	5	4	4	3	5	5	3	2	3	2	5	4	1	2	3	3	4	2
16	Nephron	2.1	Q3	5	5	5	5	4	1	1	1	1	1	4	5	5	4	5	1	1	5	5	3	1	2	3	4	1	4	3	5	5	4	1	2	5	5	2	4	3	5	5	4	4	4	2	4	5	2
17	Nephron	2.2	Scenario	5	5	5	5	5	5	2	5	5	2	5	5	5	5	5	4	5	5	5	5	1	2	5	5	3	4	3	3	4	4	2	4	2	5	5	3	3	5	5	5	3	2	2	5	4	2
18	Nephron	2.2	Q1	4	5	4	4	4	5	5	5	5	5	4	5	5	5	5	4	4	5	5	4	1	2	5	5	3	4	3	2	0	4	1	2	2	4	5	4	3	5	5	5	1	2	2	5	4	2
19	Nephron	2.2	Q2	4	5	5	5	5	5	5	5	5	5	2	5	2	5	5	4	5	5	5	5	1	2	5	5	2	5	3	2	5	4	4	3	4	5	3	4	3	4	5	4	4	3	5	4	4	2
20	Nephron	2.2	Q3	4	5	5	5	5	5	5	3	5	5	5	5	5	5	5	1	1	5	5	3	1	2	5	4	3	4	3	5	5	4	1	2	2	5	5	4	3	5	5	4	1	2	5	5	4	2
21	Nephron	2.3	Scenario	3	5	5	4	4	4	5	5	5	5	5	5	4	5	5	1	2	5	5	3	1	2	5	5	2	4	3	2	5	4	2	4	1	5	5	5	4	5	5	5	5	5	5	5	5	2
22	Nephron	2.3	Q1	1	2	5	2	3	4	3	5	5	2	5	5	5	5	2	1	1	4	5	3	1	2	5	5	2	1	2	2	5	2	4	3	4	5	5	4	3	5	5	5	1	2	2	5	5	3
23	Nephron	2.3	Q2	4	5	5	5	5	4	5	5	2	5	4	2	4	5	5	4	4	5	5	5	1	2	5	5	2	1	2	2	5	2	4	5	5	5	4	3	3	5	5	5	4	5	4	5	5	2
24	Nephron	2.3	Q3	4	4	5	5	4	2	2	3	5	2	4	4	4	4	4	1	1	5	5	1	1	2	5	5	2	3	3	5	5	5	1	2	3	5	5	4	3	5	5	5	4	5	2	5	5	2
25	Lower urinary system	3.1	Scenario	5	5	5	4	5	5	5	5	5	5	4	5	4	5	5	1	2	5	5	2	4	4	5	5	5	1	2	5	4	2	2	4	4	3	5	5	4	5	5	5	5	5	5	5	5	2
26	Lower urinary system	3.1	Q1	4	5	5	5	5	4	5	5	5	5	4	5	5	5	5	1	2	5	5	3	4	4	5	5	5	1	2	5	5	2	1	2	5	5	3	4	3	5	5	4	1	2	5	5	2	2
27	Lower urinary system	3.1	Q2	4	5	5	5	5	4	4	5	5	5	4	5	5	5	5	4	5	5	5	5	1	2	5	5	1	1	2	2	5	2	4	3	5	5	5	4	3	5	5	5	4	3	5	5	5	5
28	Lower urinary system	3.1	Q3	5	5	5	5	5	4	5	5	1	5	5	2	5	5	3	1	1	5	5	2	4	4	5	5	5	4	4	4	5	5	5	5	5	5	5	4	4	5	2	5	5	5	2	5	5	4
29	Lower urinary system	3.2	Scenario	5	5	5	5	5	4	5	3	5	5	5	5	5	5	2	1	2	5	5	2	4	4	5	5	5	4	5	5	5	5	1	5	2	5	5	5	4	5	5	5	3	3	5	3	3	2
30	Lower urinary system	3.2	Q1	4	5	5	5	5	4	5	2	1	5	4	5	5	5	3	1	2	5	5	1	1	2	5	5	2	4	4	5	5	5	5	3	5	5	3	4	3	5	5	5	2	2	4	4	2	2
31	Lower urinary system	3.2	Q2	4	5	5	5	5	4	4	2	5	5	4	4	5	5	5	1	2	5	5	3	1	2	2	5	5	5	4	2	5	5	2	4	2	5	5	4	3	5	5	5	4	3	5	5	5	2
32	Lower urinary system	3.2	Q3	4	5	5	5	5	1	1	1	1	1	4	5	5	5	2	1	3	5	5	2	1	2	2	5	5	3	3	5	5	2	1	2	2	5	4	4	3	5	2	5	2	1	1	1	1	1
33	Lower urinary system	3.3	Scenario	5	5	5	5	5	1	2	5	4	2	5	5	5	5	2	1	3	5	5	2	5	5	5	5	5	3	3	2	5	4	4	3	5	5	5	5	4	5	5	5	5	5	5	5	5	3
34	Lower urinary system	3.3	Q1	4	5	5	5	5	1	2	5	5	2	4	5	4	5	2	1	2	5	5	2	4	3	4	5	5	3	3	2	5	3	4	3	5	5	5	4	3	5	5	5	1	3	5	5	2	4
35	Lower urinary system	3.3	Q2	4	5	5	5	5	5	4	5	5	4	2	5	1	5	5	4	5	5	5	5	1	2	2	5	5	1	2	2	5	3	1	2	2	5	5	5	4	5	5	5	4	3	5	5	3	5
36	Lower urinary system	3.3	Q3	4	2	5	2	5	2	2	5	5	2	5	3	5	5	3	3	2	3	1	5	4	4	4	0	5	1	2	4	5	3	4	4	5	5	5	4	3	5	5	3	4	3	3	5	5	2
[truncated: 19 more columns]
