# Supplementary material for: Comparative Evaluation of Large Language Models for Medical Education: Performance Analysis in Urinary System Histology.
Source: Research Square preprint supplement (doi:10.21203/rs.3.rs-6186253/v1), 2025-03-13
Supplement: Supplementary file 3 [file c20a6c1469421f0a2a1998f3.docx]

# Claude 3.5-Sonnet

1.1. Scenario (Histology of Renal Corpuscle):

A 45-year-old woman presents with proteinuria and edema. Kidney biopsy is performed, revealing thickening of the glomerular basement membrane and fusion of podocyte foot processes. Light microscopy shows normal mesangial cells and intact Bowman's capsule. Electron microscopy reveals effacement of the podocyte processes and altered slit diaphragms. The patient's serum albumin is low, and urinalysis shows significant protein loss, suggesting disruption of the glomerular filtration barrier.

MCQ #1: Which component of the renal corpuscle forms the outermost layer and continues with the proximal convoluted tubule?

A) Podocytes

B) Mesangial cells

C) Bowman's capsule

D) Endothelial cells

E) Basement membrane

Correct Answer: C Rationale: Bowman's capsule is the outermost layer of the renal corpuscle and its parietal layer continues with the proximal convoluted tubule at the urinary pole, forming a crucial anatomical connection in the nephron.

MCQ #2: Which cells of the renal corpuscle are primarily responsible for maintaining the glomerular filtration barrier through their foot processes?

A) Juxtaglomerular cells

B) Mesangial cells

C) Endothelial cells

D) Podocytes

E) Parietal epithelial cells

Correct Answer: D Rationale: Podocytes form the outer layer of the glomerular filtration barrier and their interdigitating foot processes, connected by slit diaphragms, are crucial for selective filtration.

MCQ #3: In the described patient's condition, which ultrastructural change would most likely contribute to proteinuria?

A) Thickened afferent arteriole

B) Increased mesangial matrix

C) Podocyte foot process effacement

D) Enlarged Bowman's space

E) Decreased endothelial fenestrations

Correct Answer: C Rationale: Podocyte foot process effacement disrupts the normal filtration barrier, leading to loss of size selectivity and resulting in proteinuria, which is a hallmark of nephrotic syndrome.

1.2. Scenario (Renal Corpuscle Histology):

A 28-year-old woman presents with proteinuria and edema. Kidney biopsy is performed, revealing thickening of the glomerular basement membrane and fusion of podocyte foot processes when viewed under electron microscopy. Light microscopy shows normal mesangial cells and patent capillary lumens. The pathologist notes that the primary affected structures are within the filtration barrier of the renal corpuscle, specifically the components responsible for size and charge selectivity of protein filtration.

MCQ #1: Which component of the renal corpuscle's filtration barrier is primarily responsible for preventing the passage of albumin under normal conditions?

A) Bowman's capsule parietal layer

B) Mesangial cells

C) Fenestrated endothelium

D) Podocyte foot processes and slit diaphragms

E) Macula densa cells

Correct Answer: D Rationale: Podocyte foot processes and their interconnecting slit diaphragms form the final and most selective barrier to protein filtration, particularly for albumin, through both size and charge selectivity mechanisms.

MCQ #2: In a normal renal corpuscle, which structure directly contacts the glomerular basement membrane on both sides?

A) Mesangial cells

B) Podocytes and fenestrated endothelium

C) Bowman's capsule

D) Juxtaglomerular cells

E) Proximal tubule cells

Correct Answer: B Rationale: The glomerular basement membrane is contacted by podocytes on its outer (urinary) surface and fenestrated endothelium on its inner (blood) surface, forming the three-layered filtration barrier.

MCQ #3: Which histological feature best describes the appearance of normal podocytes under electron microscopy?

A) Continuous sheet of cells without processes

B) Interdigitating foot processes with 25-60 nm filtration slits

C) Solid cellular mass without filtration spaces

D) Random arrangement of cellular processes

E) Complete fusion of all cellular processes

Correct Answer: B Rationale: Normal podocytes exhibit regularly arranged interdigitating foot processes separated by filtration slits of 25-60 nm width, which are bridged by the slit diaphragm protein complex.

1.3. Scenario (Histology of Renal Corpuscle):

A 24-year-old woman presents with proteinuria during her routine pregnancy checkup. Her urinalysis shows significant protein loss, and her physician orders a kidney biopsy. The pathologist notes changes in the glomerular filtration barrier, particularly affecting the podocytes and their foot processes. The basement membrane appears thickened in some areas, and there are notable alterations in the fenestrated endothelium. This presentation prompts a detailed examination of the renal corpuscle's histological features and their role in maintaining the filtration barrier.

MCQ #1: Which of the following structures forms the outermost layer of the renal corpuscle?

A) Podocytes

B) Bowman's capsule

C) Mesangial cells

D) Fenestrated endothelium

E) Basement membrane

Correct Answer: B Rationale: Bowman's capsule is the outermost layer of the renal corpuscle, consisting of a simple squamous epithelium that encapsulates the glomerular capillaries and creates the urinary space.

MCQ #2: A patient's kidney biopsy reveals fusion of podocyte foot processes. Which of the following clinical findings would most likely be associated with this histological change?

A) Decreased glomerular filtration rate

B) Increased blood pressure

C) Proteinuria

D) Hematuria

E) Glucosuria

Correct Answer: C Rationale: Fusion of podocyte foot processes (effacement) disrupts the filtration barrier's selective permeability, leading to proteinuria as proteins leak through the damaged barrier.

MCQ #3: Which cell type within the renal corpuscle is primarily responsible for producing and maintaining the glomerular basement membrane?

A) Mesangial cells

B) Podocytes

C) Endothelial cells

D) Parietal epithelial cells

E) Juxtaglomerular cells

Correct Answer: B Rationale: Podocytes are responsible for synthesizing and maintaining the glomerular basement membrane components, which is crucial for proper filtration barrier function.

2.1. Scenario (Histology of the nephron):

A 45-year-old woman presents with persistent proteinuria discovered during routine screening. Kidney biopsy is performed, revealing foot process effacement of podocytes and fusion of these cellular extensions under electron microscopy. Light microscopy shows normal-appearing glomerular basement membrane thickness but demonstrates distinct changes in the specialized epithelial cells responsible for the initial filtration barrier. The pathologist notes that these changes are primarily affecting the visceral epithelial cells of the glomerular capsule, particularly their distinctive cellular projections.

MCQ #1: Which histological structure is most likely affected in this patient's condition?

A) Macula densa cells

B) Podocytes

C) Mesangial cells

D) Proximal tubule brush border

E) Juxtaglomerular cells

Correct Answer: B Rationale: Podocytes are specialized epithelial cells with foot processes that form the filtration barrier; their effacement is characteristic of conditions causing proteinuria, such as minimal change disease.

MCQ #2: Which ultrastructural feature of the affected cells normally contributes to proper filtration?

A) Tight junctions between adjacent cells

B) Numerous mitochondria

C) Slit diaphragms between foot processes

D) Abundant rough endoplasmic reticulum

E) Prominent Golgi apparatus

Correct Answer: C Rationale: Slit diaphragms between podocyte foot processes are crucial components of the glomerular filtration barrier, and their disruption leads to proteinuria.

MCQ #3: Which portion of the nephron would show the earliest structural changes if this condition progresses?

A) Proximal convoluted tubule

B) Loop of Henle

C) Bowman's space

D) Distal convoluted tubule

E) Collecting duct

Correct Answer: A Rationale: The proximal convoluted tubule would show the earliest structural changes due to increased protein reabsorption, leading to protein reabsorption droplets and cellular hypertrophy.

2.2. Scenario (Histology of the nephron):

A 45-year-old woman presents with persistent hypertension and proteinuria. Kidney biopsy is performed, revealing damage to the glomerular filtration barrier. Electron microscopy shows effacement of podocyte foot processes and thickening of the glomerular basement membrane. Light microscopy demonstrates normal-appearing proximal and distal convoluted tubules, but there is notable protein accumulation within the Bowman's space. The collecting ducts show normal cuboidal epithelium with intact tight junctions.

MCQ #1: Which structural component of the nephron is primarily responsible for preventing protein loss into the urine under normal conditions?

A) Proximal convoluted tubule brush border

B) Podocyte foot processes and slit diaphragms

C) Macula densa cells

D) Mesangial cells

E) Collecting duct tight junctions

Correct Answer: B Rationale: Podocyte foot processes and their interconnecting slit diaphragms form the final barrier of the glomerular filtration barrier, preventing loss of larger proteins while allowing water and small solutes to pass.

MCQ #2: Which histological feature allows the proximal convoluted tubule to efficiently reabsorb filtered substances?

A) Tight junctions between cells

B) Lack of basement membrane

C) Abundant microvilli forming brush border

D) Presence of aquaporin channels only

E) Thick smooth muscle layer

Correct Answer: C Rationale: The brush border, formed by numerous microvilli, drastically increases the surface area of proximal tubule cells, enabling efficient reabsorption of filtered substances through various transporters and channels.

MCQ #3: Which cell type in the nephron is specialized to sense changes in tubular fluid composition and regulate glomerular filtration?

A) Principal cells

B) Podocytes

C) Macula densa cells

D) Alpha-intercalated cells

E) Mesangial cells

Correct Answer: C Rationale: Macula densa cells, located in the distal tubule at the vascular pole of the glomerulus, detect changes in sodium chloride concentration and signal appropriate adjustments in glomerular filtration through tubuloglomerular feedback.

2.3. Scenario (Histology of the nephron):

A 45-year-old woman presents with generalized edema and proteinuria. Kidney biopsy is performed, revealing extensive damage to the glomerular filtration barrier, particularly affecting the podocytes and their foot processes. Electron microscopy shows effacement of the foot processes and alterations in the glomerular basement membrane. This finding highlights the importance of understanding the normal histological features of the glomerular filtration barrier and its three main components: fenestrated endothelium, glomerular basement membrane, and podocytes with their interdigitating foot processes forming filtration slits.

MCQ #1: Which of the following structures in the nephron contains fenestrated capillaries without a diaphragm?

A) Proximal convoluted tubule

B) Distal convoluted tubule

C) Glomerular capillaries

D) Peritubular capillaries

E) Loop of Henle

Correct Answer: C Rationale: Glomerular capillaries are unique in having fenestrations without diaphragms, which is essential for their filtration function, while other capillaries in the body (including peritubular capillaries) typically have fenestrations with diaphragms.

MCQ #2: Which cell type in the nephron contains the most mitochondria per unit volume?

A) Podocytes

B) Proximal tubule cells

C) Collecting duct principal cells

D) Macula densa cells

E) Distal tubule cells

Correct Answer: B Rationale: Proximal tubule cells have the highest density of mitochondria due to their intense active transport functions, particularly Na+/K+ ATPase activity for reabsorption of filtered substances.

MCQ #3: In the normal nephron, which structure forms the final barrier of the glomerular filtration membrane?

A) Glomerular basement membrane

B) Fenestrated endothelium

C) Bowman's capsule

D) Podocyte foot processes and slit diaphragms

E) Mesangial matrix

Correct Answer: D Rationale: Podocyte foot processes and their interconnecting slit diaphragms form the final barrier of glomerular filtration, playing a crucial role in preventing protein loss while allowing water and small solutes to pass.

3.1. Scenario (Histology of the lower urinary system):

A 45-year-old woman presents to her primary care physician with frequent urination and a constant urge to void, even when her bladder isn't full. Physical examination is unremarkable. A cystoscopy reveals areas of the bladder wall where the transitional epithelium appears disrupted, with underlying connective tissue exposed. Further examination shows thinning of the glycosaminoglycan (GAG) layer that normally protects the urothelium. The patient is diagnosed with interstitial cystitis.

MCQ #1: Which layer of the bladder wall is primarily responsible for preventing the back-flow of urine into the underlying tissue?

A) Muscularis mucosa

B) Lamina propria

C) Transitional epithelium

D) Detrusor muscle

E) Adventitia

Correct Answer: C Rationale: The transitional epithelium (urothelium) with its tight junctions and specialized uroplakin proteins forms a highly effective barrier against urine permeation into deeper tissues.

MCQ #2: What unique feature of the bladder's epithelial cells allows for organ distension without cellular damage?

A) Ability to secrete mucus

B) Capacity to fold and unfold

C) Multiple nuclear divisions

D) Constant cell turnover

E) Formation of new tight junctions

Correct Answer: B Rationale: The transitional epithelium's cells can change shape from cuboidal to squamous as the bladder fills, allowing for significant distension without cellular damage through folding and unfolding.

MCQ #3: In this patient's condition, which component of the bladder wall would most likely show increased mast cell infiltration?

A) Muscularis externa

B) Transitional epithelium

C) Lamina propria

D) Serosa

E) Basement membrane

Correct Answer: C Rationale: In interstitial cystitis, the lamina propria typically shows increased mast cell infiltration, which contributes to inflammation and symptoms through the release of inflammatory mediators.

3.2. Scenario (Urinary Bladder Histology):

A 67-year-old male presents with frequent urination and difficulty emptying his bladder completely. During cystoscopy, the urologist notices areas of the bladder mucosa that appear irregular and thickened. A biopsy is taken to examine the transitional epithelium (urothelium) and underlying tissue layers. The pathologist needs to assess the integrity of the various tissue layers, particularly focusing on the characteristic features of the transitional epithelium and its ability to accommodate bladder distension.

MCQ #1: Which of the following best describes the normal histological appearance of the bladder's transitional epithelium?

A) Single layer of cuboidal cells

B) Stratified squamous epithelium with keratinization

C) Multiple layers that appear different when stretched versus relaxed

D) Simple columnar epithelium with goblet cells

E) Pseudostratified ciliated columnar epithelium

Correct Answer: C Rationale: Transitional epithelium is specially adapted to allow for bladder distension, appearing thick and multilayered when relaxed but becoming thinner and stretched when the bladder is full.

MCQ #2: Which structural feature of the urinary bladder wall is primarily responsible for its ability to maintain continence?

A) Transitional epithelium

B) Lamina propria

C) Internal smooth muscle sphincter

D) External skeletal muscle sphincter

E) Adventitia

Correct Answer: C Rationale: The internal smooth muscle sphincter, formed by the detrusor muscle's circular fibers at the bladder neck, is primarily responsible for maintaining urinary continence through tonic contraction.

MCQ #3: What is the predominant type of collagen found in the lamina propria of the urinary bladder that provides elasticity during filling?

A) Type I collagen

B) Type II collagen

C) Type III collagen

D) Type IV collagen

E) Type VII collagen

Correct Answer: C Rationale: Type III collagen is the predominant type in the bladder's lamina propria, providing the necessary elasticity and flexibility required for bladder distension and contraction.

3.3. Scenario (Urinary Bladder Histology):

A 45-year-old woman presents to the urology clinic with recurrent urinary tract infections and difficulty emptying her bladder completely. Urodynamic studies reveal impaired bladder contractility. A bladder biopsy is performed to evaluate the muscular wall structure. The pathologist needs to examine the relationship between the detrusor muscle layers and the transitional epithelium to assess for any structural abnormalities that might explain the patient's symptoms.

MCQ #1: Which of the following best describes the normal histological arrangement of the bladder wall from lumen to exterior?

A) Transitional epithelium, lamina propria, longitudinal smooth muscle, circular smooth muscle, adventitia

B) Transitional epithelium, lamina propria, circular smooth muscle, longitudinal smooth muscle, adventitia

C) Stratified squamous epithelium, lamina propria, circular smooth muscle, longitudinal smooth muscle, serosa

D) Transitional epithelium, lamina propria, inner longitudinal, middle circular, outer longitudinal smooth muscle, adventitia

E) Simple columnar epithelium, submucosa, circular smooth muscle, longitudinal smooth muscle, serosa

Correct Answer: D Rationale: The bladder wall consists of transitional epithelium (urothelium), followed by lamina propria, and then three layers of smooth muscle (inner longitudinal, middle circular, and outer longitudinal) forming the detrusor muscle, with adventitia on the exterior.

MCQ #2: Which unique feature of the transitional epithelium in the urinary bladder allows for its specialized function?

A) Tight junctions between all epithelial cells

B) Presence of goblet cells

C) Ability to flatten and expand

D) Presence of cilia

E) Active transport mechanisms

Correct Answer: C Rationale: Transitional epithelium's unique feature is its ability to flatten and expand as the bladder fills and empties, allowing for significant changes in bladder volume while maintaining an effective barrier.

MCQ #3: A pathological examination of the patient's bladder biopsy reveals decreased density of muscarinic receptors in the detrusor muscle. Which layer of the bladder wall would be most affected by this finding?

A) Lamina propria

B) Transitional epithelium

C) Middle circular smooth muscle layer

D) Serosa

E) Submucosa

Correct Answer: C Rationale: The middle circular layer of the detrusor muscle is particularly rich in muscarinic receptors, which are crucial for bladder contractility; decreased receptor density in this layer would significantly impact bladder function.

# Claude 3.7- Sonnet -Normal

**1.1. Scenario:**

A 42-year-old woman presents with facial edema, foamy urine, and fatigue for the past 3 weeks. Laboratory studies reveal proteinuria (4.5 g/24 hours), hypoalbuminemia, and hyperlipidemia. A renal biopsy is performed, and light microscopy shows thickening of the glomerular basement membrane with "spike and dome" appearance on silver stain. Electron microscopy reveals subepithelial electron-dense deposits, and immunofluorescence demonstrates granular IgG and C3 deposits along the capillary walls. The pathologist notes that the podocyte foot processes appear effaced, while the endothelial fenestrations and mesangium appear relatively normal.

MCQ #1:

Which of the following histological structures forms the filtration barrier of the renal corpuscle? A) Macula densa B) Juxtaglomerular cells C) Mesangial cells D) Endothelium, basement membrane, and podocytes E) Bowman's space

**Correct Answer: D**

**Rationale:** The glomerular filtration barrier consists of three layers: fenestrated endothelium, glomerular basement membrane, and podocytes with their foot processes and slit diaphragms, which together regulate the selective filtration of blood.

MCQ #2:

In the scenario described, which component of the renal corpuscle is primarily affected by the subepithelial immune deposits? A) Afferent arteriole B) Mesangial matrix C) Podocytes and their foot processes D) Endothelial cells E) Juxtaglomerular apparatus

**Correct Answer: C**

**Rationale:** The subepithelial immune deposits in membranous nephropathy (as described in the scenario) primarily affect podocytes, leading to foot process effacement and disruption of the slit diaphragms, which results in proteinuria.

MCQ #3:

Which cells in the renal corpuscle produce the majority of the glomerular basement membrane components? A) Podocytes and endothelial cells B) Mesangial cells only C) Juxtaglomerular cells D) Macula densa cells E) Parietal epithelial cells of Bowman's capsule

**Correct Answer: A**

**Rationale:** Both podocytes and glomerular endothelial cells contribute to the synthesis and maintenance of the glomerular basement membrane, producing type IV collagen, laminin, and other matrix components.

**1.2. Scenario: Histology of Renal Corpuscle**

A 56-year-old male with a 10-year history of poorly controlled diabetes mellitus presents with progressive fatigue, peripheral edema, and foamy urine. Laboratory studies reveal elevated serum creatinine (2.4 mg/dL) and proteinuria. A renal biopsy is performed to evaluate the cause of his kidney dysfunction. Light microscopy reveals thickening of the glomerular basement membrane and expansion of the mesangial matrix within the renal corpuscles. Closer examination shows that the filtration barrier components—including podocytes, glomerular basement membrane, and fenestrated endothelium—display pathological changes consistent with diabetic nephropathy. The pathologist notes that normal renal corpuscles consist of the glomerulus (capillary tuft) enclosed by Bowman's capsule, with the space between them (Bowman's space) representing the initial collection site for the ultrafiltrate.

MCQ #1:

Which of the following structures forms the visceral layer of Bowman's capsule in the renal corpuscle? A) Macula densa cells B) Mesangial cells C) Podocytes D) Parietal epithelial cells E) Juxtaglomerular cells

**Correct Answer: C**

**Rationale:** Podocytes are specialized epithelial cells that form the visceral layer of Bowman's capsule, covering the glomerular capillaries with their foot processes that interdigitate to create filtration slits.

MCQ #2:

A patient with nephrotic syndrome undergoes kidney biopsy. Which component of the renal corpuscle's filtration barrier primarily prevents albumin from entering the ultrafiltrate under normal conditions? A) Fenestrated endothelium B) Glomerular basement membrane C) Mesangial matrix D) Efferent arteriole E) Podocyte foot processes and slit diaphragms

**Correct Answer: E**

**Rationale:** The podocyte foot processes and their interconnecting slit diaphragms form the final barrier to protein filtration, preventing large proteins like albumin from entering Bowman's space in healthy kidneys.

MCQ #3:

Which cell type in the renal corpuscle is primarily responsible for producing and maintaining the glomerular basement membrane? A) Juxtaglomerular cells B) Podocytes and endothelial cells C) Mesangial cells D) Parietal epithelial cells E) Macula densa cells

**Correct Answer: B**

**Rationale:** Both podocytes and glomerular endothelial cells contribute to the synthesis and maintenance of the glomerular basement membrane, with each cell type contributing specific components to this specialized extracellular matrix.

**1.3. Scenario: Histology of Renal Corpuscle**

A 68-year-old male with poorly controlled diabetes mellitus presents with progressive edema and proteinuria. Laboratory findings show elevated serum creatinine and blood urea nitrogen. A renal biopsy is performed to evaluate the underlying pathology. Histological examination reveals thickening of the glomerular basement membrane with nodular mesangial expansion (Kimmelstiel-Wilson lesions). There is also evidence of fusion of podocyte foot processes when viewed under electron microscopy. These findings are consistent with diabetic nephropathy affecting the filtration barrier of the renal corpuscle.

MCQ #1:

Which of the following structures in the renal corpuscle is the primary site of filtration barrier formation?

A) Mesangial cells B) Glomerular basement membrane, endothelial fenestrations, and podocyte foot processes C) Juxtaglomerular cells D) Bowman's space E) Macula densa

**Correct Answer: B**

**Rationale:** The filtration barrier consists of three components working together: the fenestrated endothelium, glomerular basement membrane, and podocyte foot processes with their slit diaphragms, which together regulate what passes from blood into the urinary space.

MCQ #2:

A patient presents with massive proteinuria. Electron microscopy of a renal biopsy shows effacement of podocyte foot processes. Which component of the renal corpuscle is most likely affected in this condition?

A) Glomerular endothelial cells B) Parietal epithelial cells of Bowman's capsule C) Visceral epithelial cells (podocytes) D) Mesangial cells E) Juxtaglomerular apparatus

**Correct Answer: C**

**Rationale:** Podocytes (visceral epithelial cells) form the outermost layer of the filtration barrier with their foot processes and slit diaphragms; effacement of foot processes indicates podocyte injury and is associated with proteinuria.

MCQ #3:

Which cell type in the renal corpuscle is responsible for producing the majority of the glomerular basement membrane components?

A) Podocytes and endothelial cells B) Mesangial cells only C) Parietal epithelial cells of Bowman's capsule D) Macula densa cells E) Juxtaglomerular cells

**Correct Answer: A**

**Rationale:** Both podocytes and endothelial cells contribute to the synthesis of the glomerular basement membrane, with podocytes producing type IV collagen, laminin, and heparan sulfate proteoglycans, while endothelial cells also contribute various components.

**2.1. Scenario: Nephron Histology Exploration**

A 35-year-old male presents with recurrent kidney stones and hypertension. Laboratory studies show elevated serum calcium and decreased serum phosphate levels. A kidney biopsy is performed to assess the nephron structures, revealing calcification in the tubules of the nephron. The pathologist wants to examine specific anatomical features to determine which segments of the nephron are most affected.

MCQ #1:

Which of the following histological features best identifies the proximal convoluted tubule of the nephron? A) Tall columnar cells with extensive microvilli forming a brush border B) Cuboidal cells with few microvilli and light cytoplasm C) Flat squamous epithelial cells with sparse organelles D) Tall cells with extensive basal infoldings and numerous mitochondria E) Cuboidal cells with intercalated dark and light cells

**Correct Answer: A** **Rationale:** Proximal convoluted tubules are characterized by tall columnar epithelial cells with a prominent brush border formed by dense microvilli, which increases surface area for reabsorption.

MCQ #2:

Which segment of the nephron is characterized histologically by thin, flattened epithelial cells and is responsible for creating the medullary concentration gradient? A) Proximal convoluted tubule B) Distal convoluted tubule C) Thin limb of the loop of Henle D) Collecting duct E) Juxtaglomerular apparatus

**Correct Answer: C** **Rationale:** The thin limb of the loop of Henle consists of simple squamous epithelium with few organelles, allowing passive water movement in the descending limb and contributing to the medullary concentration gradient.

MCQ #3:

In a patient with nephrocalcinosis, calcium deposits are most likely to be found in which histologically distinct region of the nephron? A) Bowman's capsule B) Glomerular capillaries C) Distal convoluted tubule D) Macula densa E) Vasa recta

**Correct Answer: C** **Rationale:** The distal convoluted tubule is a major site of calcium reabsorption regulated by parathyroid hormone, making it particularly susceptible to calcium deposition in conditions with altered calcium metabolism such as hyperparathyroidism

**2.2. Scenario: Histology of the Nephron**

A 65-year-old male with a 20-year history of poorly controlled type 2 diabetes mellitus presents with increasing fatigue, peripheral edema, and frothy urine. Laboratory results show elevated serum creatinine (2.4 mg/dL), reduced estimated glomerular filtration rate (eGFR) of 35 mL/min/1.73m², and significant proteinuria (3+ on dipstick). A kidney biopsy is performed to evaluate the extent of diabetic nephropathy. Histological examination reveals thickening of the glomerular basement membrane, mesangial expansion, and nodular glomerulosclerosis (Kimmelstiel-Wilson lesions).

MCQ #1:

Which histological structure of the nephron is primarily responsible for the selective filtration that is compromised in this patient? A) Distal convoluted tubule B) Collecting duct C) Glomerular filtration barrier D) Loop of Henle E) Proximal convoluted tubule

**Correct Answer: C**

**Rationale:** The glomerular filtration barrier consists of fenestrated endothelium, basement membrane, and podocytes with filtration slits, and is the primary structure responsible for selective filtration that becomes damaged in diabetic nephropathy, leading to proteinuria.

MCQ #2:

Which histological feature is most likely to be found in the proximal convoluted tubule (PCT) of this patient compared to a healthy individual? A) Increased number of mitochondria B) Loss of brush border C) Increased tubular diameter D) Decreased cell height E) Increased number of lysosomes

**Correct Answer: B**

**Rationale:** In diabetic nephropathy, the proximal convoluted tubules often show loss of the brush border (microvilli) due to tubular injury, which reduces the surface area available for reabsorption and contributes to declining kidney function.

MCQ #3:

In this patient's nephron, which histological structure would most likely show thickened basement membranes due to the accumulation of advanced glycation end products (AGEs)? A) Macula densa only B) Glomerular capillaries and tubules C) Vasa recta only D) Loop of Henle only E) Collecting ducts only

**Correct Answer: B**

**Rationale:** In diabetic nephropathy, basement membrane thickening due to AGE accumulation occurs in both glomerular capillaries and tubules, contributing to the pathophysiology of diabetic kidney disease by altering filtration and reabsorption properties.

**2.3. Scenario: Nephron Histology**

A 28-year-old woman presents with severe peripheral edema, hypoalbuminemia, and proteinuria of 4.5 g/day. Kidney biopsy is performed, revealing effacement of podocyte foot processes and thickening of the glomerular basement membrane. The pathologist notes that the proximal tubules show evidence of protein reabsorption droplets, while the distal tubules and collecting ducts appear normal. The patient is diagnosed with minimal change disease.

MCQ #1:

Which histological structure forms the main filtration barrier in the renal corpuscle? A) Mesangial cells B) Fenestrated endothelium, glomerular basement membrane, and podocyte foot processes C) Juxtaglomerular apparatus D) Bowman's capsule parietal epithelium E) Macula densa cells

**Correct Answer: B**

**Rationale:** The renal filtration barrier consists of three components: fenestrated endothelium, glomerular basement membrane, and podocyte foot processes with their slit diaphragms, which together regulate the size and charge selectivity of filtration.

MCQ #2:

In the histological examination of a kidney biopsy, which of the following would help differentiate proximal tubules from distal tubules? A) Proximal tubules have a striated border while distal tubules do not B) Distal tubules have larger lumens than proximal tubules C) Proximal tubules lack nuclei while distal tubules have prominent nuclei D) Distal tubules have more mitochondria than proximal tubules E) Proximal tubules and distal tubules cannot be differentiated histologically

**Correct Answer: A**

**Rationale:** Proximal tubules have a brush border (striated appearance) due to microvilli that increase surface area for reabsorption, while distal tubules lack this feature and have a smoother luminal surface.

MCQ #3:

In the patient's condition described in the scenario, which part of the nephron is primarily affected? A) Proximal convoluted tubule B) Loop of Henle C) Distal convoluted tubule D) Glomerulus E) Collecting duct

**Correct Answer: D**

**Rationale:** Minimal change disease primarily affects the glomerular filtration barrier, specifically the podocytes whose foot process effacement leads to proteinuria, while the tubular changes (protein reabsorption droplets) are secondary to the increased protein filtration.

**3.1. Scenario: Histology of the Lower Urinary System**

A 45-year-old male presents to the urology clinic with complaints of urinary frequency, urgency, and difficulty initiating urination for the past 3 months. Physical examination reveals an enlarged prostate. A biopsy of the lower urinary tract is performed to investigate potential obstruction and rule out malignancy. The patient's tissue samples need to be examined for histological features characteristic of the lower urinary system to understand the underlying pathology.

MCQ #1:

Which epithelial lining is normally found in the urinary bladder? A) Simple squamous epithelium B) Simple cuboidal epithelium C) Stratified squamous epithelium D) Transitional epithelium (urothelium) E) Pseudostratified columnar epithelium

**Correct Answer: D**

**Rationale:** The urinary bladder is lined by transitional epithelium (urothelium), which can change shape and appear thinner when the bladder is distended, allowing for expansion without damage to the epithelial lining.

MCQ #2:

Which layer of the urinary bladder wall contains dense irregular connective tissue with abundant elastic fibers that allows for expansion? A) Mucosa B) Lamina propria C) Muscularis mucosa D) Muscularis propria (detrusor muscle) E) Adventitia/serosa

**Correct Answer: B**

**Rationale:** The lamina propria of the urinary bladder contains dense irregular connective tissue with abundant elastic fibers that allow for expansion while maintaining structural integrity when the bladder fills with urine.

MCQ #3:

A histological specimen of the male urethra shows stratified columnar epithelium with numerous mucus-secreting glands. From which region of the urethra was this specimen most likely obtained? A) Prostatic urethra B) Membranous urethra C) Penile (spongy) urethra D) External urethral meatus E) Bladder neck

**Correct Answer: A**

**Rationale:** The prostatic urethra is typically lined with stratified columnar epithelium or pseudostratified columnar epithelium and contains numerous mucus-secreting glands, whereas other regions transition to stratified squamous epithelium more distally.

**3.2. Scenario: Histology of the Lower Urinary System**

A 67-year-old male presents with increased urinary frequency, nocturia, and weak urinary stream for the past 6 months. Digital rectal examination reveals an enlarged, firm prostate. A biopsy of the posterior wall of the urinary bladder is performed to rule out malignancy. Histological examination shows transitional epithelium with underlying lamina propria containing scattered lymphocytes, a discontinuous muscularis mucosae, and detrusor muscle organized in three indistinct layers.

MCQ #1

Which of the following best describes the normal histological feature of the urothelium that protects against the hypertonic environment of urine? A) Abundant tight junctions between superficial cells B) Hexagonal superficial cells with specialized apical plaques C) Thick basement membrane with type IV collagen D) High concentration of glycosaminoglycans in superficial cells E) Multiple layers of stratified squamous epithelium

**Correct Answer: B**

**Rationale:** The superficial cells (umbrella cells) of the urothelium have distinctive hexagonal shapes and contain specialized membrane plaques composed of uroplakins that form a barrier against the hypertonic urine environment.

MCQ #2

A histological section of the urinary bladder wall reveals an area where the muscularis layer shows hypertrophy and altered arrangement. This finding is most consistent with which condition? A) Transitional cell carcinoma B) Interstitial cystitis C) Benign prostatic hyperplasia D) Bladder outlet obstruction E) Urinary tract infection

**Correct Answer: D**

**Rationale:** Bladder outlet obstruction (which can result from prostatic enlargement) causes compensatory detrusor muscle hypertrophy as the bladder works against increased resistance, leading to visible thickening and altered arrangement of the muscularis layer.

MCQ #3

The urethra of a male patient is being examined histologically. Which of the following features would distinguish the prostatic urethra from the membranous urethra? A) Presence of pseudostratified columnar epithelium B) Surrounding skeletal muscle fibers C) Presence of prostatic glandular tissue opening into the lumen D) Thick layer of elastic fibers E) Absence of lamina propria

**Correct Answer: C**

**Rationale:** The prostatic urethra is characterized by the presence of prostatic glandular tissue that opens directly into the urethral lumen, while the membranous urethra lacks these glands and is surrounded by the external urethral sphincter composed of skeletal muscle.

**3.3. Scenario: Lower Urinary System Histology**

A 67-year-old male presents to the urology clinic with complaints of increased urinary frequency, nocturia, and difficulty initiating urination. Physical examination reveals an enlarged prostate. A biopsy of the bladder wall is performed to rule out possible extension of prostatic changes. The pathology report describes a transitional epithelium with underlying lamina propria, muscularis propria composed of smooth muscle bundles arranged in inner longitudinal, middle circular, and outer longitudinal layers, and an outer adventitial layer.

MCQ #1:

Which of the following best describes the epithelium of the urinary bladder? A) Simple squamous epithelium B) Simple columnar epithelium C) Stratified squamous epithelium D) Transitional epithelium (urothelium) E) Pseudostratified columnar epithelium

**Correct Answer: D**

**Rationale:** The urinary bladder is lined by transitional epithelium (urothelium), which can change shape from cuboidal to squamous as the bladder fills, allowing for distension without damage to the epithelial barrier.

MCQ #2:

A microscopic examination of the patient's bladder biopsy reveals umbrella cells. What is the primary function of these cells? A) Phagocytosis of bacteria B) Production of mucus C) Formation of an impermeable barrier D) Contraction to facilitate urination E) Secretion of antimicrobial peptides

**Correct Answer: C**

**Rationale:** Umbrella cells (also called dome cells) form the superficial layer of the urothelium and contain specialized membrane plaques with uroplakins that create an impermeable barrier to prevent urine from damaging underlying tissues.

MCQ #3:

Which layer of the urinary bladder wall is primarily responsible for bladder contraction during micturition? A) Mucosa B) Lamina propria C) Muscularis propria (detrusor muscle) D) Adventitia E) Serosa

**Correct Answer: C**

**Rationale:** The muscularis propria, also known as the detrusor muscle, consists of smooth muscle arranged in three layers and is responsible for bladder contraction during micturition (urination).

# Claude 3.7- Sonnet -Extend

**1.1. Scenario (about Histology of Renal corpuscle):**

A 45-year-old man presents with proteinuria, hypertension, and gradually worsening renal function. A kidney biopsy reveals abnormalities in the renal corpuscles, including thickening of the glomerular basement membrane, fusion of podocyte foot processes, and proliferation of mesangial cells. The pathologist notes that these changes are affecting the filtration barrier of the renal corpuscles, leading to protein leakage into the urine. The clinical presentation is consistent with a glomerular disease affecting the normal architecture of the renal corpuscles.

MCQ #1:

Which of the following structures constitutes the main filtration barrier in the renal corpuscle? A) Mesangial cells B) Parietal epithelium of Bowman's capsule C) Glomerular basement membrane, fenestrated endothelium, and podocyte foot processes D) Macula densa cells E) Juxtaglomerular cells

**Correct Answer:** C **Rationale:** The main filtration barrier consists of three layers: the fenestrated endothelium of glomerular capillaries, the glomerular basement membrane, and the filtration slits between podocyte foot processes. Damage to any of these components can lead to proteinuria.

MCQ #2:

The fusion of podocyte foot processes observed in this patient's biopsy would most likely result in: A) Decreased glomerular filtration rate due to constriction of afferent arterioles B) Increased protein filtration due to disruption of filtration slit diaphragms C) Decreased protein filtration due to narrowed filtration slits D) Increased sodium reabsorption in the proximal tubule E) Activation of the renin-angiotensin-aldosterone system

**Correct Answer:** B **Rationale:** Fusion of podocyte foot processes disrupts the normal slit diaphragm architecture, reducing the size selectivity of the filtration barrier and allowing proteins to leak into Bowman's space, resulting in proteinuria.

MCQ #3:

Mesangial cell proliferation, as seen in this patient, affects glomerular function primarily by: A) Increasing the production of erythropoietin B) Decreasing the surface area available for filtration C) Enhancing the contractile response to angiotensin II D) Reducing the synthesis of renin E) Increasing the reabsorption of sodium in the distal convoluted tubule

**Correct Answer:** B **Rationale:** Mesangial cells occupy the space between glomerular capillaries; their proliferation expands the mesangium, compressing capillaries and reducing the surface area available for filtration, thus decreasing glomerular filtration rate.

**1.2. Scenario: Histology of Renal Corpuscle**

A 45-year-old man presents with edema, foamy urine, and hypoalbuminemia. Renal biopsy is performed for suspected nephrotic syndrome. Light microscopy shows thickening of the glomerular capillary walls. Electron microscopy reveals subepithelial immune complex deposits and effacement of podocyte foot processes. The pathologist notes that these changes are confined to the renal corpuscles, consistent with membranous nephropathy. The attending physician asks medical students to review the normal histology of renal corpuscles to better understand the patient's pathology.

MCQ #1:

Which of the following is NOT a component of a normal renal corpuscle? A) Glomerulus B) Bowman's capsule C) Loop of Henle D) Mesangial cells E) Podocytes

**Correct Answer: C** **Rationale:** The Loop of Henle is part of the renal tubular system, not the renal corpuscle. The renal corpuscle consists of the glomerulus, Bowman's capsule, Bowman's space, and mesangial cells.

MCQ #2:

Which layer of the glomerular filtration barrier is primarily responsible for size-selective filtration? A) Fenestrated endothelium B) Glomerular basement membrane C) Podocyte foot processes and slit diaphragms D) Mesangial matrix E) Parietal epithelium of Bowman's capsule

**Correct Answer: C** **Rationale:** Podocyte foot processes form slit diaphragms that provide the final size-selective barrier in glomerular filtration, preventing the passage of larger proteins while allowing water and small solutes to pass.

MCQ #3:

The pathological finding of "podocyte foot process effacement" in this patient's biopsy would most likely result in: A) Decreased glomerular filtration rate B) Proteinuria C) Hyperkalemia D) Hyperphosphatemia E) Metabolic acidosis

**Correct Answer: B** **Rationale:** Podocyte foot process effacement disrupts the size-selective filtration barrier, allowing proteins like albumin to leak into the urine, resulting in proteinuria and subsequently hypoalbuminemia.

**1.3. Scenario Renal Corpuscle Histology**

A 42-year-old woman presents with edema, hypertension, and proteinuria. Renal biopsy is performed, revealing thickening of the glomerular basement membrane (GBM) and effacement of podocyte foot processes when viewed under electron microscopy. Light microscopy demonstrates normal cellularity but shows occasional "spike and dome" appearances along the GBM. Immunofluorescence reveals granular deposits of IgG and C3 along the GBM. The pathologist notes that the mesangial cells appear normal, and Bowman's space is preserved without evidence of crescents.

MCQ #1:

Which of the following structures forms the filtration barrier in the renal corpuscle? A) Juxtaglomerular cells B) Mesangial cells C) Podocytes, glomerular basement membrane, and endothelial cells D) Macula densa E) Collecting duct cells

**Correct Answer: C**

**Rationale:** The filtration barrier consists of three components: fenestrated endothelial cells, the glomerular basement membrane, and the foot processes of podocytes with their intervening slit diaphragms.

MCQ #2:

In the patient's biopsy, which histological structure is most likely affected by the "effacement of podocyte foot processes"? A) Bowman's capsule B) Glomerular slit diaphragms C) Mesangial matrix D) Juxtaglomerular apparatus E) Proximal tubule brush border

**Correct Answer: B**

**Rationale:** Effacement of podocyte foot processes leads to loss of slit diaphragms, which are specialized cell junctions between adjacent foot processes that play a crucial role in preventing protein leakage.

MCQ #3:

What cell type in the renal corpuscle produces renin? A) Podocytes B) Mesangial cells C) Juxtaglomerular cells D) Parietal epithelial cells of Bowman's capsule E) Macula densa cells

**Correct Answer: C**

**Rationale:** Juxtaglomerular cells are modified smooth muscle cells located in the walls of afferent arterioles that synthesize and secrete renin in response to decreased blood pressure or sodium chloride delivery.

**2.1. Scenario (Histology of the Nephron):**

A 45-year-old man presents with new-onset hypertension and mild peripheral edema. Urinalysis shows moderate proteinuria. A renal biopsy is performed, and light microscopy reveals effacement of foot processes in the glomerulus and thickening of the glomerular basement membrane. Electron microscopy confirms fusion of podocyte foot processes.

MCQ #1:

Which of the following structures forms the main size-selective component of the glomerular filtration barrier that is affected in this patient? A) Endothelial cell fenestrations B) Glomerular basement membrane C) Podocyte foot processes and slit diaphragms D) Mesangial cell matrix E) Bowman's capsule parietal epithelium

**Correct Answer: C** **Rationale:** Podocyte foot processes and their slit diaphragms form the size-selective barrier that prevents proteins from entering the filtrate; their effacement (fusion) leads to proteinuria as seen in this patient.

MCQ #2:

Which segment of the nephron would show the most distinctive histological feature of a prominent brush border composed of microvilli? A) Glomerular parietal epithelium B) Proximal convoluted tubule C) Thin descending limb of loop of Henle D) Distal convoluted tubule E) Collecting duct

**Correct Answer: B** **Rationale:** The proximal convoluted tubule has a distinctive brush border composed of microvilli that greatly increases surface area for reabsorption of filtered substances.

MCQ #3:

Which cells of the nephron are specialized to sense changes in the NaCl concentration of the filtrate and contribute to the regulation of glomerular filtration rate and renin release? A) Podocytes B) Proximal tubular cells C) Macula densa cells D) Principal cells of the collecting duct E) Thin limb cells of the loop of Henle

**Correct Answer: C** **Rationale:** Macula densa cells are modified distal tubular cells that sense NaCl concentration in the filtrate and signal the juxtaglomerular cells to modulate renin release and afferent arteriolar tone.

**2.2. Scenario (Histology of the nephron):**

A 65-year-old woman with a 20-year history of diabetes mellitus and hypertension presents with progressive fatigue, nausea, and bilateral lower extremity edema. Laboratory studies show elevated serum creatinine (2.5 mg/dL), proteinuria (2g/day), and glycosuria. A kidney biopsy is performed for further evaluation.

MCQ #1:

Which segment of the nephron has epithelial cells with a prominent brush border that can be visualized using PAS staining? A) Proximal convoluted tubule B) Thin descending limb of Henle C) Thick ascending limb of Henle D) Distal convoluted tubule E) Collecting duct

**Correct Answer: A** **Rationale:** The proximal convoluted tubule is lined by cuboidal epithelial cells with a prominent brush border (microvilli) that increases surface area for reabsorption and can be visualized using PAS staining due to its glycoprotein content.

MCQ #2:

Which histological finding would most likely be observed in the glomeruli of this patient with long-standing diabetes? A) Minimal change disease with podocyte foot process effacement only B) Nodular glomerulosclerosis (Kimmelstiel-Wilson lesions) C) Wire loop lesions D) Crescent formation E) Thin basement membrane disease

**Correct Answer: B** **Rationale:** Nodular glomerulosclerosis, characterized by mesangial nodules (Kimmelstiel-Wilson lesions), is a characteristic histological finding in diabetic nephropathy, resulting from increased mesangial matrix deposition and mesangial cell proliferation.

MCQ #3:

Glycosuria in this patient is primarily due to dysfunction in which of the following nephron segments? A) Glomerulus B) Proximal convoluted tubule C) Loop of Henle D) Distal convoluted tubule E) Collecting duct

**Correct Answer: B** **Rationale:** Glucose reabsorption occurs almost exclusively in the proximal convoluted tubule via SGLT2 transporters; in diabetes, when the glucose load exceeds the reabsorptive capacity of these transporters, glycosuria results.

**2.3. Scenario (Histology of the nephron):**

During a histology laboratory session, first-year medical students are examining kidney tissue sections under light microscopy. The instructor points out various segments of the nephron and asks students to identify their distinctive histological features. The students observe renal corpuscles with glomerular tufts, different tubular segments with varying epithelial characteristics, and collecting ducts. In one specimen from a patient with diabetic nephropathy, they also note thickening of the glomerular basement membrane compared to normal kidney tissue.

MCQ #1:

Which histological feature best distinguishes the proximal convoluted tubule from the distal convoluted tubule in a standard H&E stain? A) Presence of cuboidal epithelium B) Location relative to the glomerulus C) Presence of a prominent brush border D) Number of nuclei per cross-section E) Presence of mitochondria

**Correct Answer: C** **Rationale:** The proximal convoluted tubule (PCT) has a prominent brush border (microvilli) visible under light microscopy, while the distal convoluted tubule (DCT) lacks this feature, making it the most reliable distinguishing characteristic.

MCQ #2:

A student observes a portion of the nephron with simple squamous epithelium and a thin wall. This structure is most likely the: A) Proximal convoluted tubule B) Distal convoluted tubule C) Thin descending limb of loop of Henle D) Thick ascending limb of loop of Henle E) Collecting duct

**Correct Answer: C** **Rationale:** The thin descending limb of the loop of Henle is lined by simple squamous epithelium, making it the thinnest portion of the nephron with the lowest epithelial height.

MCQ #3:

The specialized cells in the wall of the afferent arteriole that synthesize and secrete renin are: A) Podocytes B) Mesangial cells C) Macula densa cells D) Juxtaglomerular cells E) Principal cells

**Correct Answer: D** **Rationale:** Juxtaglomerular cells are modified smooth muscle cells located in the wall of the afferent arteriole that synthesize and secrete renin as part of the renin-angiotensin-aldosterone system.

**3.1. Scenario:**

A 65-year-old man presents with painless hematuria and dysuria. Cystoscopy reveals a papillary growth on the posterior wall of the urinary bladder. A biopsy is taken, and histological examination shows abnormal cells in the urothelium with nuclear pleomorphism and disruption of the basement membrane.

MCQ #1:

Which of the following correctly describes the layers of the urinary bladder wall from the lumen outward? A) Mucosa, submucosa, muscularis, serosa B) Transitional epithelium, lamina propria, muscularis, adventitia/serosa C) Simple columnar epithelium, lamina propria, muscularis, adventitia D) Stratified squamous epithelium, submucosa, muscularis, serosa E) Urothelium, muscularis mucosa, submucosa, muscularis propria, serosa

**Correct Answer: B** **Rationale:** The urinary bladder wall consists of a mucosa (comprising transitional epithelium or urothelium and lamina propria), muscularis (detrusor muscle), and adventitia/serosa (connective tissue covering).

MCQ #2:

Which characteristic feature of the transitional epithelium in the urinary bladder allows for significant changes in bladder volume? A) Ability to secrete mucus B) Extensive capillary network C) Ability to stretch and flatten when the bladder fills D) Presence of tight junctions between epithelial cells E) Continuous cell division and replacement

**Correct Answer: C** **Rationale:** Transitional epithelium (urothelium) is specialized to accommodate changes in volume, with cells that can change shape from cuboidal to squamous as the bladder fills, allowing the epithelium to stretch without breaking.

MCQ #3:

Based on the histological findings in this patient, what is the most likely diagnosis? A) Squamous cell carcinoma B) Interstitial cystitis C) Transitional cell carcinoma (urothelial carcinoma) D) Benign prostatic hyperplasia E) Urinary tract infection

**Correct Answer: C** **Rationale:** The papillary growth with nuclear pleomorphism and basement membrane disruption in the urothelium are classic findings in transitional cell carcinoma, which is the most common type of bladder cancer.

**3.2. Scenario (about Histology of the lower urinary system):**

A 65-year-old male with a 40-year history of cigarette smoking presents with painless hematuria. Cystoscopy reveals a papillary growth on the posterior wall of the urinary bladder. A biopsy is taken, and histopathological examination shows neoplastic cells arising from the epithelial lining of the bladder with invasion into the underlying connective tissue.

MCQ #1:

What is the normal epithelial lining of the urinary bladder? A) Simple squamous epithelium B) Simple cuboidal epithelium C) Stratified squamous epithelium D) Transitional epithelium (urothelium) E) Pseudostratified columnar epithelium

**Correct Answer: D** **Rationale:** The urinary bladder is lined by transitional epithelium (urothelium), which is specialized to accommodate changes in volume as the bladder fills and empties.

MCQ #2:

The muscular layer of the urinary bladder is known as: A) Muscularis mucosa B) Detrusor muscle C) External urethral sphincter D) Dartos muscle E) Trigone muscle

**Correct Answer: B** **Rationale:** The muscular layer of the urinary bladder is the detrusor muscle, composed of smooth muscle fibers arranged in multiple directions that contract during micturition to expel urine.

MCQ #3:

The most likely diagnosis for this patient based on the clinical and histopathological findings is: A) Squamous cell carcinoma B) Adenocarcinoma C) Transitional cell carcinoma (Urothelial carcinoma) D) Small cell carcinoma E) Rhabdomyosarcoma

**Correct Answer: C** **Rationale:** Transitional cell carcinoma is the most common type of bladder cancer, arising from the transitional epithelium, and is strongly associated with cigarette smoking as a risk factor.

**3.3. Scenario: Histology of the Lower Urinary System**

A 65-year-old male with a 30-pack-year smoking history presents with painless hematuria for the past 2 months. Cystoscopy reveals a papillary lesion on the posterior wall of the urinary bladder. A biopsy is performed for histological examination and staging.

MCQ #1:

Which of the following best describes the normal histological organization of the urinary bladder wall from lumen to periphery?

A) Stratified squamous epithelium, lamina propria, muscularis mucosa, submucosa, muscularis externa, serosa B) Transitional epithelium, lamina propria, detrusor muscle (inner longitudinal, middle circular, outer longitudinal layers), adventitia/serosa C) Simple columnar epithelium, lamina propria, muscularis mucosa, submucosa, muscularis externa, serosa D) Transitional epithelium, submucosa, muscularis (circular and longitudinal layers), adventitia E) Stratified cuboidal epithelium, lamina propria, smooth muscle layer, adventitia

**Correct Answer: B**

**Rationale:** The urinary bladder wall consists of transitional epithelium (urothelium), lamina propria, detrusor muscle arranged in three layers, and an outer adventitia or serosa, which allows for distension and contraction during filling and emptying.

MCQ #2:

Based on the patient's clinical presentation and demographics, which histological finding would most likely be observed in the biopsy specimen?

A) Sheets of small cells with hyperchromatic nuclei, scant cytoplasm, and frequent mitoses invading the lamina propria B) Granulomatous inflammation with multinucleated giant cells C) Papillary projections lined by multiple layers of transitional epithelium with nuclear atypia and disrupted basement membrane D) Umbrella cells with prominent eosinophilic cytoplasm and binucleated appearance E) Squamous metaplasia with keratinization

**Correct Answer: C**

**Rationale:** The clinical presentation of painless hematuria in an older smoker with a papillary lesion is classic for transitional cell (urothelial) carcinoma, which histologically shows papillary projections lined by dysplastic transitional epithelium with varying degrees of invasion.

MCQ #3:

Which histological feature would be most useful in distinguishing a superficial (non-muscle-invasive) from an invasive urothelial carcinoma in this patient's biopsy?

A) Presence of nuclear pleomorphism B) Presence of umbrella cells C) Invasion of tumor cells beyond the basement membrane into the lamina propria or muscle layer D) Degree of keratinization E) Presence of koilocytosis

**Correct Answer: C**

**Rationale:** The defining feature of invasive urothelial carcinoma is the penetration of tumor cells through the basement membrane into the lamina propria (T1) or muscularis propria/detrusor muscle (T2), which significantly affects prognosis and treatment decisions.

# ChatGPT-01

**1.1. Scenario (about Histology of the Renal Corpuscle):**
A 20-year-old medical student is examining a renal biopsy under the microscope. She notes the distinctive arrangement of the renal corpuscle: a spherical glomerulus composed of capillary loops surrounded by Bowman’s capsule. The visceral layer of Bowman’s capsule is lined with podocytes, whose interdigitating foot processes form filtration slits. The glomerular basement membrane lies between the podocytes and the fenestrated capillaries, serving as a critical filtration barrier. Mesangial cells occupy the space between capillary loops, providing structural support and regulating glomerular filtration dynamics. The student recalls that dysfunction in these components—such as basement membrane thickening or podocyte injury—can lead to proteinuria and renal pathology.

MCQ #1

A patient with nephrotic syndrome presents with significant proteinuria. Which component of the renal corpuscle is primarily responsible for preventing large proteins from passing into the filtrate?
A) Mesangial cells
B) Parietal layer of Bowman’s capsule
C) Glomerular basement membrane
D) Podocyte cell bodies
E) Proximal convoluted tubule epithelium

**Correct Answer: C) Glomerular basement membrane**
**Rationale (1–2 sentences):** The glomerular basement membrane (GBM) provides a key filtration barrier against large proteins. Damage or thickening of the GBM is often implicated in conditions like nephrotic syndrome.

MCQ #2

Which of the following best describes the visceral layer of Bowman’s capsule?
A) Simple squamous epithelium with fenestrations
B) Cuboidal epithelium specialized for absorption
C) Podocytes with interdigitating foot processes
D) Flattened fibroblasts that secrete collagen
E) Endothelial cells containing membrane-bound organelles

**Correct Answer: C) Podocytes with interdigitating foot processes**
**Rationale (1–2 sentences):** The visceral layer of Bowman’s capsule is lined by podocytes, which possess foot processes that form filtration slits around the glomerular capillaries. These slits are essential for selective filtration in the kidney.

MCQ #3

A researcher studying an early diabetic nephropathy sample notices expansion of certain cells and matrix within the glomerulus. Which cells are most likely involved?
A) Podocytes
B) Juxtaglomerular cells
C) Macula densa cells
D) Mesangial cells
E) Parietal epithelial cells

**Correct Answer: D) Mesangial cells**
**Rationale (1–2 sentences):** Mesangial cells reside in the central part of the glomerular tuft and are known to proliferate and produce increased mesangial matrix in diabetic nephropathy, contributing to

**1.2. Scenario (about Histology of the Renal Corpuscle):**
A 32-year-old man with a recent streptococcal infection presents with tea-colored urine and swelling in his feet. Laboratory results show RBC casts and mild proteinuria. A renal biopsy is performed to assess the histology of the renal corpuscles. Under the microscope, the glomerulus contains capillary loops lined by fenestrated endothelial cells, a shared glomerular basement membrane, and specialized podocytes forming the visceral layer. Mesangial cells and their matrix support the capillary network. Bowman’s capsule, composed of parietal epithelium, encloses Bowman’s space, where filtrate initially accumulates. The patient also reports decreased urine output and periorbital edema, both common in acute glomerular inflammation. Recognition of these structures is vital to understanding the pathophysiological changes seen in glomerular diseases like acute post-streptococcal glomerulonephritis.

MCQ #1

**Which cell type forms the visceral layer of Bowman’s capsule?**
A) Podocytes
B) Endothelial cells
C) Mesangial cells
D) Parietal epithelial cells
E) Macula densa cells

**Correct Answer: A) Podocytes**
**Rationale (1–2 sentences):**
Podocytes are specialized epithelial cells that line the outer surface of the glomerular capillaries and constitute the visceral layer of Bowman’s capsule.

MCQ #2

**Which structure in the renal corpuscle is primarily responsible for supporting the glomerular capillaries and regulating their surface area?**
A) Juxtaglomerular cells
B) Podocytes
C) Mesangial cells
D) Parietal epithelial cells
E) Fenestrated endothelium

**Correct Answer: C) Mesangial cells**
**Rationale (1–2 sentences):**
Mesangial cells lie between the glomerular capillaries, providing structural support and regulating filtration surface area via their contractile properties.

MCQ #3

**Which portion of the renal corpuscle is immediately continuous with the proximal convoluted tubule?**
A) Visceral layer of Bowman’s capsule
B) Parietal layer of Bowman’s capsule
C) Macula densa
D) Juxtaglomerular apparatus
E) Afferent arteriole

**Correct Answer: B) Parietal layer of Bowman’s capsule**
**Rationale (1–2 sentences):**
The parietal layer of Bowman’s capsule transitions into the tubular epithelium at the urinary pole, forming the beginning of the proximal convoluted tubule.

1.3. Scenario (about [Histology of Renal corpuscle]):
During a pathology lab session, a first-year medical student examines a kidney biopsy from a 22-year-old patient who presented with mild proteinuria. Under the microscope, the student notes a spherical structure known as the renal corpuscle, consisting of the glomerulus surrounded by Bowman’s capsule. The glomerular capillaries are lined by fenestrated endothelial cells, allowing certain plasma components to pass. Beneath the endothelium lies the glomerular basement membrane, a crucial tri-layer barrier for filtration. The visceral layer of Bowman’s capsule is formed by podocytes, whose interdigitating foot processes create filtration slits. Mesangial cells and the surrounding mesangial matrix provide structural support and modulate filtration. The parietal layer of Bowman’s capsule forms an outer boundary, leading into the proximal tubule.

MCQ #1:
Which of the following cell types is primarily responsible for providing structural support within the glomerulus and regulating the surface area available for filtration?

A) Podocytes
B) Juxtaglomerular cells
C) Macula densa cells
D) Mesangial cells
E) Parietal epithelial cells

Correct Answer: D) Mesangial cells

Rationale (1-2 sentences):
Mesangial cells are specialized cells that offer structural support within the glomerulus and can contract or relax to adjust glomerular filtration surface area.

MCQ #2:
A histology slide of the renal corpuscle demonstrates a layer lined by cells with interdigitating foot processes. This layer is best described as:

A) Parietal layer of Bowman’s capsule
B) Visceral layer of Bowman’s capsule
C) Descending limb of the loop of Henle
D) Collecting duct
E) Juxtaglomerular apparatus

Correct Answer: B) Visceral layer of Bowman’s capsule

Rationale (1-2 sentences):
Podocytes, which have foot processes (pedicels), line the visceral layer of Bowman’s capsule and form part of the glomerular filtration barrier.

MCQ #3:
A 35-year-old patient’s kidney biopsy shows immune complex deposition with a “spike and dome” appearance along the filtration barrier. Which component of the glomerular filtration barrier is primarily affected in this condition?

A) Fenestrated endothelium
B) Podocyte foot processes
C) Glomerular basement membrane
D) Mesangial matrix
E) Parietal epithelial cells

Correct Answer: C) Glomerular basement membrane

Rationale (1-2 sentences):
In membranous nephropathy (characterized by a “spike and dome” appearance), immune complexes deposit in the glomerular basement membrane, leading to thickening and dysfunction of this crucial filtration layer.

2.1. Scenario (Histology of the nephron):

A 23-year-old man presents with mild ankle edema and frothy urine. Laboratory tests reveal significant proteinuria but otherwise unremarkable findings. A renal biopsy shows normal glomerular architecture under light microscopy, but electron microscopy demonstrates effacement of podocyte foot processes consistent with minimal change disease. Notably, the glomerulus has fenestrated endothelial cells, a specialized glomerular basement membrane (GBM), and podocytes with interdigitating foot processes. The proximal convoluted tubule (PCT) is lined by simple cuboidal epithelium with a brush border, the thin segments of the loop of Henle by simple squamous epithelium, and the thick ascending limb and distal convoluted tubule by simple cuboidal cells with fewer microvilli. The collecting ducts contain principal and intercalated cells involved in final urine concentration.

MCQ #1: Which portion of the nephron is primarily responsible for the majority of glucose and amino acid reabsorption?

A) Glomerulus
B) Proximal convoluted tubule
C) Thin descending limb of the loop of Henle
D) Distal convoluted tubule
E) Collecting duct

Correct Answer: B (Proximal convoluted tubule)
Rationale (1–2 sentences): The PCT has a prominent brush border and numerous transporters enabling extensive reabsorption of glucose, amino acids, and other solutes.

MCQ #2: Which histological finding is most characteristic of minimal change disease?

A) Thickening of the glomerular basement membrane
B) Mesangial expansion with IgA deposition
C) Subepithelial “humps” on electron microscopy
D) Effacement of podocyte foot processes
E) Crescent formation in Bowman’s space

Correct Answer: D (Effacement of podocyte foot processes)
Rationale (1–2 sentences): Minimal change disease is defined by diffuse effacement of the podocyte foot processes seen on electron microscopy, with minimal or no changes by light microscopy.

MCQ #3: Which region of the loop of Henle is lined by simple squamous epithelium?

A) Thick ascending limb
B) Thick descending limb
C) Thin descending limb
D) Medullary collecting duct
E) Proximal convoluted tubule

Correct Answer: C (Thin descending limb)
Rationale (1–2 sentences): The thin descending (and thin ascending) limbs of the loop of Henle are lined by simple squamous epithelium, facilitating passive transport processes essential for urine concentration.

**2.2. Scenario (Histology of the nephron)**
A 22-year-old college student presents with edema and mild hypertension. Urinalysis shows proteinuria. A kidney biopsy demonstrates hypercellularity within the glomerular capillary loops. You note that the glomerular basement membrane (GBM) appears thickened under light microscopy.

**MCQ #1:**
Which histological component primarily forms the filtration barrier in the glomerulus?
A) Podocyte foot processes
B) Macula densa cells
C) Mesangial cells
D) Bowman’s capsule parietal layer
E) Juxtaglomerular cells

**Correct Answer: A (Podocyte foot processes)**
**Rationale (1–2 sentences):** The filtration barrier consists of the fenestrated endothelium, the glomerular basement membrane, and the podocyte foot processes with their slit diaphragms.

**MCQ #2:**
Which structure within the glomerulus is most responsible for providing structural support to the capillaries and regulating blood flow?
A) Endothelial cells
B) Mesangial cells
C) Juxtaglomerular cells
D) Podocytes
E) Parietal epithelial cells

**Correct Answer: B (Mesangial cells)**
**Rationale (1–2 sentences):** Mesangial cells provide mechanical support, clear debris, and can modulate capillary blood flow within the glomerulus.

**MCQ #3:**
A biopsy in a patient with glomerular disease demonstrates an immune complex deposition in the GBM. Which histological layer would primarily be affected?
A) Visceral layer of Bowman’s capsule
B) Fenestrated endothelium
C) Parietal layer of Bowman’s capsule
D) Glomerular basement membrane
E) Macula densa

**Correct Answer: D (Glomerular basement membrane)**
**Rationale (1–2 sentences):** Immune complex deposition in classic glomerulonephritides often occurs within the GBM, altering its permeability and leading to proteinuria or hematuria.

2.3. **Scenario (Histology of the nephron)**
A 35-year-old marathon runner presents with fatigue and mild dehydration. Lab tests reveal slightly elevated serum creatinine and decreased urine output. Microscopic examination of the kidney tissue shows necrosis of the proximal tubular epithelium, with loss of the brush border in many areas.

**MCQ #1:**
What unique histological feature characterizes the proximal convoluted tubule (PCT) cells?
A) Fenestrated endothelium
B) Tall columnar cells with brush borders
C) Smooth muscle cells surrounding the tubule
D) Minimal mitochondrial content
E) Flattened epithelial cells lacking microvilli

**Correct Answer: B (Tall columnar cells with brush borders)**
**Rationale (1–2 sentences):** The PCT is lined by tall columnar epithelial cells, which have an extensive brush border (microvilli) to maximize reabsorption.

**MCQ #2:**
Which organelle is most abundant in PCT cells to meet high energy demands for active transport?
A) Golgi apparatus
B) Lysosomes
C) Peroxisomes
D) Mitochondria
E) Smooth endoplasmic reticulum

**Correct Answer: D (Mitochondria)**
**Rationale (1–2 sentences):** PCT cells require significant ATP for active transport processes, and thus they contain numerous mitochondria.

**MCQ #3:**
Loss of the brush border in PCT cells would most directly impair the reabsorption of which substance?
A) Water in the descending limb
B) Bicarbonate in the collecting duct
C) Glucose in the PCT
D) Urea in the ascending limb
E) Sodium in the distal convoluted tubule

**Correct Answer: C (Glucose in the PCT)**
**Rationale (1–2 sentences):** The brush border of the PCT contains transporters essential for glucose reabsorption, so damage to the brush border reduces glucose reuptake.

3.1. Scenario [Histology of the lower urinary system]:
A 54-year-old man presents with painless hematuria. Cystoscopic examination reveals a small lesion on the bladder wall. A biopsy is taken, and the pathology report highlights the characteristic transitional (urothelial) epithelium lining the bladder. Further microscopic evaluation shows multiple layers of epithelial cells with umbrella cells on the surface, overlying lamina propria and the detrusor muscle beneath.

MCQ #1:
Which layer of the bladder wall primarily contains the smooth muscle responsible for bladder contraction?
A) Urothelium (transitional epithelium)
B) Lamina propria
C) Detrusor muscle
D) Serosa
E) Adventitia

**Correct Answer: C) Detrusor muscle**
**Rationale (1–2 sentences):** The detrusor muscle is the thick layer of smooth muscle in the bladder wall that contracts during micturition. It lies beneath the mucosal layers (urothelium and lamina propria).

MCQ #2:
What is the primary function of the urothelium (transitional epithelium) in the bladder?
A) Active filtration of blood
B) Production of mucus
C) Protection from toxins and accommodation of volume changes
D) Absorption of water
E) Synthesis of steroid hormones

**Correct Answer: C) Protection from toxins and accommodation of volume changes**
**Rationale (1–2 sentences):** Transitional epithelium is uniquely structured to stretch and recoil while providing a barrier against potentially toxic substances in urine. The umbrella cells on the surface allow the bladder to expand as it fills.

MCQ #3:
Which of the following features is characteristic of transitional cell carcinoma arising from the bladder urothelium?
A) Originating from the submucosal connective tissue
B) Arising from the detrusor muscle layer exclusively
C) Dysplastic urothelial cells with atypical umbrella cells
D) Glandular pattern with mucus-secreting cells
E) Presence of stratified squamous epithelium replacing urothelium

**Correct Answer: C) Dysplastic urothelial cells with atypical umbrella cells**
**Rationale (1–2 sentences):** Transitional (urothelial) cell carcinoma typically shows disordered urothelial architecture with cellular atypia. Malignant changes involve the transitional epithelium, including its umbrella cells.

3.2. Scenario [Histology of the lower urinary system]:
A 62-year-old male presents with painless hematuria. On cystoscopic examination, a tumor is identified in the bladder. A biopsy is taken, and the pathology report describes transitional (urothelial) epithelium with areas of dysplastic cells invading the lamina propria. The urologist explains that understanding the layered structure of the bladder wall—including the urothelium, lamina propria, and muscularis propria—is critical for determining prognosis and treatment.

**MCQ #1**
Which type of epithelium primarily lines the bladder?
A) Simple squamous epithelium
B) Simple columnar epithelium
C) Stratified squamous epithelium
D) Transitional (urothelial) epithelium
E) Pseudostratified columnar epithelium

**Correct Answer: D**
**Rationale (1–2 sentences):** The bladder is lined by transitional (urothelial) epithelium, which can stretch and recoil. This unique epithelium prevents urine from diffusing back into the bloodstream.

**MCQ #2**
Which of the following layers is immediately beneath the urothelium in the bladder wall?
A) Submucosa
B) Lamina propria
C) Muscularis propria (detrusor muscle)
D) Serosa
E) Adventitia

**Correct Answer: B**
**Rationale (1–2 sentences):** The lamina propria lies directly under the urothelium in the bladder. It contains connective tissue, blood vessels, and nerves and serves as a support layer before reaching the muscular layer.

**MCQ #3**
In early-stage urothelial carcinoma, tumor cells most commonly invade which layer first?
A) Muscularis propria (detrusor muscle)
B) Serosa
C) Lamina propria
D) Periurethral glands
E) Adventitia

**Correct Answer: C**
**Rationale (1–2 sentences):** Urothelial carcinomas typically begin in the epithelium and then invade the lamina propria before reaching the muscularis propria. The depth of invasion into these layers determines prognosis and treatment strategies.

**3.3. Scenario (Bladder Histology):**
A 52-year-old man presents with painless hematuria. Imaging reveals a suspicious lesion in the bladder. Cystoscopy and biopsy show a lining of transitional (urothelial) epithelium with areas of cellular atypia and loss of normal polarity.

**MCQ #1:**

Which of the following best describes the normal histological lining of the urinary bladder?

A) Stratified squamous epithelium
B) Simple columnar epithelium
C) Stratified columnar epithelium
D) Transitional (urothelial) epithelium
E) Pseudostratified columnar epithelium

**Correct Answer: D**
**Rationale (1–2 sentences):** The bladder is lined by transitional (urothelial) epithelium, which allows it to stretch and accommodate varying volumes of urine.

**MCQ #2:**

Which feature is most characteristic of transitional (urothelial) epithelium seen in the bladder?

A) Numerous goblet cells
B) Brush border microvilli
C) Dome-shaped cells at the surface
D) Keratinized surface layer
E) Multiple cilia on the apical surface

**Correct Answer: C**
**Rationale (1–2 sentences):** Transitional epithelium exhibits dome-shaped (umbrella) cells on the surface layer that flatten when the bladder is distended

MCQ #3

A pathologist notes that a patient’s bladder biopsy shows “dome-shaped” umbrella cells at the surface of a multi-layered epithelium. Which of the following pathologies is least likely to arise from this epithelial layer?
A. Urothelial (transitional) carcinoma
B. Squamous cell carcinoma of the bladder
C. Carcinoma in situ of the urothelium
D. Papillary urothelial carcinoma
E. Urothelial hyperplasia

**Correct Answer: B**
**Rationale (1–2 sentences)**: Squamous cell carcinoma typically arises from areas of squamous metaplasia or chronic irritation, not from the classic transitional (urothelial) epithelium, whereas urothelial carcinomas (including papillary and carcinoma in situ) derive directly from the transitional epithelium.

# ChatGPT-o3-Mini-High

**1.1. Scenario [Histology of Renal corpuscle]:**
A 7-year-old boy presents with periorbital edema and foamy urine. Laboratory tests reveal significant proteinuria with normal renal function. A kidney biopsy shows normal glomeruli on light microscopy; however, electron microscopy reveals diffuse effacement of the podocyte foot processes—highlighting the essential role of the visceral layer of Bowman's capsule in the renal corpuscle’s filtration barrier, a finding characteristic of minimal change disease.

**MCQ #1:**
Which cell type, located in the visceral layer of Bowman's capsule, is most critical for maintaining the glomerular filtration barrier?
A) Parietal epithelial cells
B) Podocytes
C) Juxtaglomerular cells
D) Mesangial cells
E) Endothelial cells of peritubular capillaries

Correct Answer: B
Rationale: Podocytes are specialized cells that form interdigitating foot processes with slit diaphragms, which are essential for the selective filtration function of the renal corpuscle.

**MCQ #2:**
In minimal change disease, which of the following histological findings is most characteristic on electron microscopy?
A) Immune complex deposition in the mesangium
B) Thickening of the glomerular basement membrane
C) Effacement of podocyte foot processes
D) Crescent formation in Bowman's space
E) Splitting of the glomerular basement membrane

Correct Answer: C
Rationale: Minimal change disease is defined by the effacement (flattening) of podocyte foot processes seen on electron microscopy, while light microscopy typically appears normal.

**MCQ #3:**
The renal corpuscle is composed of which two main structures?
A) Glomerulus and Bowman's capsule
B) Glomerulus and proximal convoluted tubule
C) Renal tubule and Loop of Henle
D) Proximal and distal convoluted tubules
E) Glomerulus and collecting duct

Correct Answer: A
Rationale: The renal corpuscle consists of the glomerulus—a network of capillaries—and Bowman's capsule, which surrounds the glomerulus and plays a key role in the initial filtration of blood.

**1.2. Scenario [Histology of Renal corpuscle]:**

A 25‐year‐old man presents with sudden-onset cola-colored urine and periorbital edema 2 weeks after a streptococcal pharyngitis. A renal biopsy reveals enlarged glomeruli with hypercellularity and immune complex deposition. The focus is on the normal histological architecture of the renal corpuscle—namely, the glomerulus and Bowman's capsule, including its specialized cell types and capillary features.

**MCQ 1.1**

Which of the following best describes the structural components of the renal corpuscle?

**A)** Glomerulus only

**B)** Glomerulus and Bowman’s capsule

**C)** Bowman’s capsule and proximal tubule

**D)** Glomerulus and distal tubule

**E)** Glomerulus and collecting duct

**Correct Answer:** B
**Rationale:** The renal corpuscle is composed of the glomerulus (a capillary tuft) and Bowman’s capsule, which together form the site of initial blood filtration.

**MCQ 1.2**

The inner (visceral) layer of Bowman’s capsule is primarily composed of which cell type?

**A)** Parietal epithelial cells

**B)** Podocytes

**C)** Mesangial cells

**D)** Endothelial cells

**E)** Macula densa cells

**Correct Answer:** B
**Rationale:** The visceral layer is lined by podocytes, which have interdigitating foot processes that create filtration slits essential for the filtration barrier.

**MCQ 1.3**

Which feature of the glomerular capillaries is crucial for effective filtration?

**A)** Continuous non-fenestrated endothelium

**B)** Fenestrated endothelium

**C)** Thickened basement membrane

**D)** Absence of a basement membrane

**E)** Presence of primary cilia

**Correct Answer:** B
**Rationale:** The fenestrated endothelium allows plasma to be filtered while retaining larger cellular components, making it essential for proper glomerular function.

**1.3. Scenario [Histology of Renal corpuscle]:**

A 45‐year‐old woman with a 10‐year history of type 2 diabetes mellitus presents with microalbuminuria and gradually increasing proteinuria. A renal biopsy demonstrates thickening of the glomerular basement membrane with mesangial expansion. This scenario emphasizes how chronic metabolic changes affect the histological integrity of the renal corpuscle.

**MCQ 2.1**

In diabetic nephropathy, which histological change is most commonly observed in the renal corpuscle?

**A)** Thinning of the glomerular basement membrane

**B)** Thickening of the glomerular basement membrane

**C)** Reduction in mesangial matrix

**D)** Fusion of parietal epithelial cells

**E)** Increased number of podocytes

**Correct Answer:** B
**Rationale:** Diabetic nephropathy is characterized by thickening of the glomerular basement membrane along with mesangial expansion, which disrupts normal filtration.

**MCQ 2.2**

Which cell type in the renal corpuscle is critical for maintaining the filtration barrier and is often compromised in diabetic nephropathy?

**A)** Parietal epithelial cells

**B)** Podocytes

**C)** Juxtaglomerular cells

**D)** Macula densa cells

**E)** Proximal tubular cells

**Correct Answer:** B
**Rationale:** Podocytes form the visceral layer of Bowman’s capsule and their injury or loss in diabetic nephropathy leads to disruption of the filtration barrier.

**MCQ 2.3**

What is the primary function of the glomerular basement membrane within the renal corpuscle?

**A)** To secrete renin

**B)** To support podocyte structure and act as a selective filtration barrier

**C)** To reabsorb electrolytes

**D)** To facilitate secretion of waste products

**E)** To concentrate urine

**Correct Answer:** B
**Rationale:** The glomerular basement membrane provides structural support to podocytes and, together with other layers, functions as a selective barrier during the filtration of blood plasma.

2.1. Scenario [Histology of the nephron]:

A 25‐year‐old female with a history of systemic lupus erythematosus presents with hematuria and mild proteinuria. A renal biopsy demonstrates immune complex deposition in the glomeruli. Histologically, the glomerulus shows fenestrated capillary endothelial cells, a well‐defined glomerular basement membrane (GBM), and podocytes with interdigitating foot processes, all surrounded by Bowman's capsule. Recognizing these structures is key to understanding how immune-mediated injury disrupts the filtration barrier.

**MCQ #1:** Which of the following cells is NOT directly involved in forming the glomerular filtration barrier?
A) Fenestrated endothelial cells
B) Podocytes
C) Mesangial cells
D) Glomerular basement membrane
E) None of the above
**Correct Answer:** C
**Rationale:** The filtration barrier consists of fenestrated endothelial cells, the GBM, and podocyte foot processes; mesangial cells, while important for structural support, are not a direct component of the barrier.

**MCQ #2:** In immune complex–mediated glomerulonephritis, the primary site of deposition is within which nephron structure?
A) Proximal convoluted tubule
B) Loop of Henle
C) Glomerulus
D) Distal convoluted tubule
E) Collecting duct
**Correct Answer:** C
**Rationale:** Immune complexes deposit primarily in the glomerulus, leading to inflammation and disruption of the normal filtration process.

**MCQ #3:** Which histological change is most commonly observed in early glomerulonephritis?
A) Loss of brush border in the proximal tubule
B) Thickening of the glomerular basement membrane
C) Atrophy of the distal convoluted tubule
D) Dilation of collecting ducts
E) Hyperplasia of the Loop of Henle epithelium
**Correct Answer:** B
**Rationale:** Early glomerulonephritis often shows thickening of the GBM due to immune complex deposition and inflammatory processes, whereas the other changes are not typically seen in this phase.

2.2. Scenario [Histology of the nephron]:

A 32‐year‐old male presents with polyuria, glycosuria, and aminoaciduria. His clinical picture is consistent with Fanconi syndrome. Kidney biopsy reveals damage to the proximal tubule, particularly a loss of the dense apical brush border that normally facilitates reabsorption of glucose and other solutes. Understanding the specialized histological features of the proximal tubule is essential for correlating its dysfunction with clinical findings.

**MCQ #1:** Which histological feature is characteristic of the proximal tubule?
A) Sparse cytoplasm
B) Apical microvilli forming a brush border
C) Simple cuboidal cells lacking microvilli
D) Thin basement membrane
E) Simple squamous epithelium
**Correct Answer:** B
**Rationale:** The proximal tubule is lined by cells with an extensive brush border of microvilli, which increases the surface area for reabsorption.

**MCQ #2:** Damage to the proximal tubule brush border would most likely impair the reabsorption of:
A) Water
B) Glucose
C) Urea
D) Creatinine
E) Aldosterone
**Correct Answer:** B
**Rationale:** The brush border in the proximal tubule is crucial for the reabsorption of solutes like glucose; its damage can lead to glycosuria, as seen in Fanconi syndrome.

**MCQ #3:** Fanconi syndrome primarily results from dysfunction of which nephron segment?
A) Glomerulus
B) Proximal tubule
C) Loop of Henle
D) Distal tubule
E) Collecting duct
**Correct Answer:** B
**Rationale:** Fanconi syndrome is characterized by a generalized defect in proximal tubular reabsorption, leading to losses of glucose, amino acids, and other solutes.

2.3. Scenario [Histology of the nephron]:

A 40‐year‐old male presents with polyuria and polydipsia and is suspected to have nephrogenic diabetes insipidus. Renal histology reveals distinct features: the thin descending limb of the Loop of Henle is lined by simple squamous epithelium that is highly permeable to water, whereas the thick ascending limb is composed of cuboidal cells that actively transport ions but lack aquaporin channels. In addition, the collecting duct, which normally responds to ADH, is unresponsive in this condition. Recognizing these differences is critical to understanding the countercurrent multiplication system and its role in water reabsorption.

**MCQ #1:** Which of the following best describes the histology of the thin descending limb of the Loop of Henle?
A) Cuboidal cells with abundant mitochondria
B) Simple squamous epithelium facilitating water reabsorption
C) Simple columnar cells with a brush border
D) Transitional epithelium
E) Stratified squamous epithelium
**Correct Answer:** B
**Rationale:** The thin descending limb is lined by simple squamous epithelium, which allows for passive water reabsorption as the filtrate descends into the increasingly hyperosmolar medulla.

**MCQ #2:** The thick ascending limb of the Loop of Henle is best characterized by which of the following features?
A) High water permeability due to aquaporin channels
B) Presence of a brush border
C) Cuboidal cells with active ion transport and a lack of aquaporin channels
D) Simple squamous epithelium with passive ion diffusion
E) Transitional epithelium
**Correct Answer:** C
**Rationale:** The thick ascending limb is composed of cuboidal cells that actively transport sodium, potassium, and chloride, and due to the absence of aquaporin channels, it is impermeable to water.

**MCQ #3:** In nephrogenic diabetes insipidus, decreased responsiveness to ADH primarily affects which nephron segment?
A) Glomerulus
B) Proximal tubule
C) Loop of Henle
D) Distal convoluted tubule and collecting duct
E) Renal pelvis
**Correct Answer:** D
**Rationale:** ADH exerts its effects on the distal convoluted tubule and collecting duct to promote water reabsorption; in nephrogenic diabetes insipidus, these segments are unresponsive, leading to excessive water loss.

3.1. Scenario [Histology of the lower urinary system]:

A 25‐year‐old female presents with recurrent episodes of dysuria and lower abdominal pain. A cystoscopic biopsy of her bladder mucosa is performed to evaluate histological changes associated with chronic cystitis.

**MCQ #1:**
Which epithelial type normally lines the urinary bladder and is specialized for stretching?
A) Stratified squamous epithelium
B) Simple cuboidal epithelium
C) Transitional (urothelial) epithelium
D) Simple columnar epithelium
E) Stratified columnar epithelium
**Correct Answer:** C
**Rationale:** The urinary bladder is lined by transitional epithelium (urothelium), which can expand and contract as the bladder fills and empties.

**MCQ #2:**
In chronic cystitis, inflammatory cells predominantly infiltrate which layer of the bladder wall?
A) Urothelium
B) Lamina propria
C) Muscularis propria
D) Adventitia
E) Serosa
**Correct Answer:** B
**Rationale:** The lamina propria, a layer of connective tissue just beneath the urothelium, is most commonly infiltrated by inflammatory cells during cystitis.

**MCQ #3:**
The detrusor muscle, which facilitates bladder contraction, is composed of which type of muscle tissue?
A) Cardiac muscle
B) Skeletal muscle
C) Smooth muscle
D) Striated muscle
E) Voluntary muscle
**Correct Answer:** C
**Rationale:** The detrusor muscle is made up of smooth muscle fibers that contract involuntarily to expel urine from the bladder.

3.2. Scenario 2 [Histology of the lower urinary system]:

A 65‐year‐old male with a significant smoking history presents with painless hematuria. Cystoscopy reveals a suspicious lesion, and a biopsy is performed to determine the histological nature of the tumor.

**MCQ #1:**
What is the most common type of bladder cancer originating from the urothelium?
A) Squamous cell carcinoma
B) Adenocarcinoma
C) Transitional cell carcinoma (urothelial carcinoma)
D) Small cell carcinoma
E) Sarcoma
**Correct Answer:** C
**Rationale:** Transitional cell carcinoma, also known as urothelial carcinoma, is the most common bladder cancer, particularly in patients with a history of smoking.

**MCQ #2:**
Which histological feature is most characteristic of transitional cell carcinoma?
A) Keratin pearls
B) Glandular formation
C) Papillary fronds with cellular pleomorphism
D) Abundant lymphoid aggregates
E) Signet ring cells
**Correct Answer:** C
**Rationale:** Transitional cell carcinoma often exhibits papillary fronds with cellular atypia and pleomorphism, features that help differentiate it from other carcinoma types.

**MCQ #3:**
In staging bladder cancer, invasion of which layer is critical for determining a more advanced disease?
A) Urothelium
B) Lamina propria
C) Muscularis propria (detrusor muscle)
D) Adventitia
E) Serosa
**Correct Answer:** C
**Rationale:** Invasion into the muscularis propria (detrusor muscle) is a key factor in bladder cancer staging, as it signifies a more invasive and potentially aggressive tumor.

3.3. Scenario [Histology of the lower urinary system]:

A 45‐year‐old male presents with difficulty urinating and a history of urethral trauma. A biopsy of the affected urethral segment is obtained to evaluate histological changes that may explain his urethral stricture.

**MCQ #1:**
Which epithelial lining is normally found in the prostatic portion of the male urethra?
A) Simple columnar epithelium
B) Stratified squamous epithelium
C) Transitional (urothelial) epithelium
D) Pseudostratified columnar epithelium
E) Simple squamous epithelium
**Correct Answer:** C
**Rationale:** The prostatic urethra is typically lined by transitional epithelium, which is consistent with other parts of the lower urinary tract.

**MCQ #2:**
In the context of a urethral stricture, which histological finding is most commonly observed?
A) Epithelial hyperplasia
B) Fibrosis and scarring in the subepithelial tissue
C) Inflammatory granulomas
D) Neoplastic transformation
E) Adipose tissue deposition
**Correct Answer:** B
**Rationale:** Urethral strictures usually result from fibrosis and scarring of the subepithelial tissue following trauma or inflammation, leading to a narrowed urethral lumen.

**MCQ #3:**
The anterior (penile) urethra is predominantly lined by which type of epithelium?
A) Transitional (urothelial) epithelium
B) Stratified squamous epithelium
C) Simple columnar epithelium
D) Pseudostratified columnar epithelium
E) Simple squamous epithelium
**Correct Answer:** B
**Rationale:** The anterior urethra is lined by stratified squamous epithelium, which provides protection against mechanical stress and abrasion during urination.

# ChatGPT 4.5

1.1. Scenario (about Histology of Renal corpuscle):
A 23-year-old woman presents to her physician complaining of facial swelling, especially around the eyes, and foamy urine for the past week. She recently recovered from an upper respiratory tract infection. Laboratory tests reveal significant proteinuria and mild hypoalbuminemia. A renal biopsy is performed. Histological examination under the microscope reveals increased permeability of the renal corpuscles. Electron microscopy demonstrates effacement of podocyte foot processes, although the glomerular basement membrane (GBM) appears normal. Immunofluorescence microscopy shows no significant immune complex deposits within the glomerulus.

MCQ #1:
Histologically, the podocyte foot processes observed in this patient usually function to: A) Filter large plasma proteins
B) Actively reabsorb glucose
C) Secrete renin
D) Form the macula densa
E) Create the juxtaglomerular apparatus

Correct Answer: A
Rationale (1-2 sentences): Podocyte foot processes form filtration slits that restrict passage of large plasma proteins. Their effacement, as seen in minimal change disease, leads to proteinuria.

MCQ #2:
Which structure directly surrounds the glomerular capillaries and constitutes part of the filtration barrier? A) Bowman’s capsule parietal layer
B) Podocyte visceral layer
C) Distal convoluted tubule
D) Juxtaglomerular cells
E) Mesangial cells

Correct Answer: B
Rationale (1-2 sentences): The visceral layer of Bowman’s capsule is composed of podocytes, which cover glomerular capillaries and contribute to the filtration barrier.

MCQ #3:
The absence of significant immune complex deposits in this patient suggests a diagnosis most consistent with: A) Post-streptococcal glomerulonephritis
B) Minimal change disease
C) Membranous nephropathy
D) IgA nephropathy
E) Rapidly progressive glomerulonephritis

Correct Answer: B
Rationale (1-2 sentences): Minimal change disease is characterized histologically by effacement of podocyte foot processes without immune deposits. This differentiates it from immune-mediated glomerulopathies.

1.2. Scenario (about Histology of Renal corpuscle):
A 26-year-old man presents with swelling around his eyes and lower limbs over the past week. Laboratory tests reveal marked proteinuria and hypoalbuminemia, suggesting nephrotic syndrome. A renal biopsy is obtained to evaluate his condition histologically. Under microscopy, renal corpuscles show normal basement membrane thickness but pronounced effacement and fusion of the epithelial foot processes (podocytes) lining the glomerular capillaries. No significant inflammation, immune deposits, or structural changes in mesangial or endothelial cells are observed. These findings indicate a primary alteration involving podocyte structure and function, affecting glomerular filtration barrier integrity.

MCQ #1:
Histological examination of the renal corpuscle in this patient would predominantly demonstrate alterations in which of the following structures?
A) Endothelial cells
B) Mesangial cells
C) Basement membrane
D) Podocyte foot processes
E) Bowman's capsule epithelium
**Correct Answer:** D
**Rationale:** Effacement and fusion of podocyte foot processes are characteristic histological changes seen in nephrotic syndrome, especially minimal change disease.

MCQ #2:
The patient's clinical symptoms of edema and proteinuria most directly result from disruption of which renal structure?
A) Parietal epithelium of Bowman's capsule
B) Glomerular capillary endothelium
C) Juxtaglomerular apparatus
D) Glomerular basement membrane
E) Filtration slits between podocyte foot processes
**Correct Answer:** E
**Rationale:** Proteinuria in nephrotic syndrome arises primarily due to loss of the selective filtration barrier, particularly through disruption of the filtration slits formed by podocyte foot processes.

MCQ #3:
Which of the following would be least likely found on histological evaluation of renal corpuscles in this scenario?
A) Immune complex deposits
B) Fusion of podocyte foot processes
C) Normal thickness of glomerular basement membrane
D) Absence of significant inflammation
E) Normal mesangial cellularity
**Correct Answer:** A
**Rationale:** Immune complex deposition is not characteristic of minimal change disease; instead, this condition typically features normal histology except for podocyte foot process effacement.

1.3. Scenario (about Histology of Renal Corpuscle):
A 10-year-old boy is brought to the clinic by his parents with complaints of facial puffiness and swelling around his ankles over the past week. Urinalysis reveals significant proteinuria. Histological examination of a renal biopsy shows normal glomeruli on light microscopy but reveals diffuse effacement of podocyte foot processes on electron microscopy. No immune complex deposition or inflammatory cells are observed. The glomerular basement membrane and mesangium appear normal. The patient responds rapidly to steroid therapy, supporting a diagnosis of minimal change disease.

MCQ #1:
Histologically, which structure of the renal corpuscle is primarily affected in minimal change disease?
A) Mesangial cells
B) Juxtaglomerular apparatus
C) Podocyte foot processes
D) Parietal epithelial cells
E) Afferent arteriole
**Correct Answer:** C
**Rationale (1-2 sentences):** Minimal change disease is characterized by diffuse effacement (flattening) of podocyte foot processes. Other structures appear histologically normal.

MCQ #2:
The renal corpuscle consists mainly of which two key components?
A) Loop of Henle and distal convoluted tubule
B) Glomerulus and Bowman's capsule
C) Collecting duct and afferent arteriole
D) Macula densa and juxtaglomerular cells
E) Vasa recta and peritubular capillaries
**Correct Answer:** B
**Rationale (1-2 sentences):** The renal corpuscle is composed primarily of the glomerulus (capillary network) surrounded by Bowman's capsule, forming the initial filtration site of the nephron.

MCQ #3:
In this patient’s renal biopsy, the absence of immune complex deposits helps differentiate minimal change disease from which of the following conditions?
A) Acute tubular necrosis
B) IgA nephropathy
C) Diabetic nephropathy
D) Hypertensive nephrosclerosis
E) Renal artery stenosis
**Correct Answer:** B
**Rationale (1-2 sentences):** IgA nephropathy is characterized by immune complex deposition in the mesangium, differentiating it histologically from minimal change disease, which lacks these deposits.

2.1. Scenario (about Histology of the Nephron):

A 26-year-old woman presents with generalized edema and significant proteinuria. Renal biopsy reveals flattening and fusion of podocyte foot processes under electron microscopy. Immunofluorescence staining is negative, showing no immune complex deposits.

MCQ #1:
Which nephron structure is primarily affected, leading to this patient's presentation?
A) Proximal convoluted tubule
B) Distal convoluted tubule
C) Collecting duct
D) Glomerular basement membrane
E) Podocytes
**Correct Answer:** E
**Rationale:** Flattening and fusion of podocyte foot processes indicate damage specific to podocytes, characteristic of minimal change disease.

MCQ #2:
Which histological finding would typically be present in the proximal convoluted tubule under normal conditions?
A) Thin squamous epithelial lining
B) Columnar epithelium with abundant microvilli
C) Cuboidal epithelium lacking microvilli
D) Stratified squamous epithelium
E) Transitional epithelium
**Correct Answer:** B
**Rationale:** The proximal convoluted tubule has cuboidal to low columnar cells with abundant microvilli (brush border) to facilitate reabsorption.

MCQ #3:
In a healthy nephron, which segment would demonstrate cells responsive to aldosterone, influencing sodium and potassium homeostasis?
A) Proximal convoluted tubule
B) Thin descending loop of Henle
C) Thick ascending loop of Henle
D) Distal convoluted tubule and collecting duct
E) Renal corpuscle
**Correct Answer:** D
**Rationale:** Aldosterone primarily acts on the distal convoluted tubule and collecting duct, regulating sodium reabsorption and potassium secretion.

2.2. Scenario (about Histology of the Nephron):

A 28-year-old man presents with generalized edema, foamy urine, and fatigue. Laboratory tests reveal significant proteinuria and hypoalbuminemia. Kidney biopsy shows diffuse effacement of podocyte foot processes under electron microscopy, but no immune complex deposits or structural damage to the glomerular basement membrane.

MCQ #1:
Which nephron structure is primarily affected in this patient’s condition?
A) Proximal convoluted tubule
B) Distal convoluted tubule
C) Podocytes
D) Macula densa
E) Juxtaglomerular cells
**Correct Answer: C**
Rationale: Effacement of podocyte foot processes is characteristic of minimal change disease, which disrupts glomerular filtration leading to proteinuria.

MCQ #2:
What component of the glomerular filtration barrier typically prevents significant protein loss into the urine under normal conditions?
A) Fenestrated capillary endothelium
B) Parietal layer of Bowman's capsule
C) Glomerular basement membrane
D) Mesangial cells
E) Macula densa
**Correct Answer: C**
Rationale: The glomerular basement membrane acts as a critical selective barrier against large proteins such as albumin due to its negatively charged components.

MCQ #3:
Histological examination reveals normal glomerular basement membrane thickness and absence of immune complex deposition. This finding is most consistent with which diagnosis?
A) Membranous nephropathy
B) Post-streptococcal glomerulonephritis
C) Diabetic nephropathy
D) Minimal change disease
E) Lupus nephritis
**Correct Answer: D**
Rationale: Minimal change disease features normal glomerular histology on light microscopy and absence of immune deposits, differentiating it from other glomerular disorders.

2.3. Scenario (about Histology of the nephron):

A 45-year-old woman with a history of uncontrolled diabetes mellitus presents with swelling in her legs and foamy urine. Laboratory tests reveal significant proteinuria. Renal biopsy is performed, and histological examination shows thickening of the glomerular basement membrane and expansion of the mesangial matrix with diffuse glomerulosclerosis.

MCQ #1: The histological changes described in the patient primarily affect which nephron structure? A) Proximal convoluted tubule
B) Distal convoluted tubule
C) Collecting duct
D) Glomerulus
E) Loop of Henle
Correct Answer: D
Rationale (1-2 sentences): Thickening of the basement membrane and mesangial matrix expansion are hallmark features of diabetic glomerulosclerosis, which specifically affects the glomerulus.

MCQ #2: Which histological component contributes most directly to the formation of the filtration barrier altered in this patient? A) Podocytes
B) Juxtaglomerular cells
C) Macula densa
D) Intercalated cells
E) Principal cells
Correct Answer: A
Rationale (1-2 sentences): Podocytes form foot processes that wrap around glomerular capillaries, playing a critical role in maintaining the integrity of the filtration barrier. Damage leads to proteinuria.

MCQ #3: Histological staining in this patient’s renal biopsy specifically demonstrates increased deposition of what extracellular component within the mesangium? A) Elastin
B) Type IV collagen
C) Laminin
D) Glycogen
E) Amyloid
Correct Answer: B
Rationale (1-2 sentences): In diabetic nephropathy, there is increased deposition of Type IV collagen within the mesangium, causing matrix expansion and glomerular dysfunction.

3.1. Scenario (about Histology of the lower urinary system):

A 65-year-old man visits his physician complaining of painless hematuria and increased urinary frequency. He has smoked cigarettes for over 30 years. Cystoscopy reveals multiple irregular lesions in the urinary bladder mucosa. A biopsy is performed, and histologic examination reveals transitional epithelium with disorganized architecture, nuclear atypia, and mitotic figures infiltrating into the underlying connective tissue.

MCQ #1:
Which of the following histological features normally characterizes the epithelium lining the urinary bladder?
A) Simple columnar epithelium with goblet cells
B) Stratified squamous epithelium with keratinization
C) Transitional epithelium with umbrella cells
D) Simple cuboidal epithelium with cilia
E) Pseudostratified columnar epithelium with stereocilia
**Correct Answer: C**
Rationale (1-2 sentences): Transitional epithelium, also known as urothelium, lines the urinary bladder and contains characteristic umbrella cells that allow expansion and contraction of the bladder as it fills and empties.

MCQ #2:
The nuclear atypia and invasion into underlying connective tissue observed in this patient's biopsy specimen is most indicative of which pathology?
A) Acute cystitis
B) Benign prostatic hyperplasia
C) Transitional cell carcinoma
D) Squamous metaplasia
E) Interstitial cystitis
**Correct Answer: C**
Rationale (1-2 sentences): Transitional cell carcinoma (urothelial carcinoma) is characterized by nuclear atypia, mitotic activity, and invasion of malignant transitional epithelial cells into the deeper tissues of the bladder wall.

MCQ #3:
Which risk factor significantly increases the likelihood of developing the lesion identified in this patient's urinary bladder?
A) Chronic NSAID usage
B) Heavy alcohol consumption
C) Chronic urinary catheterization
D) Cigarette smoking
E) Vitamin B12 deficiency
**Correct Answer: D**
Rationale (1-2 sentences): Cigarette smoking is a major risk factor strongly associated with the development of transitional cell carcinoma of the bladder, due to carcinogenic substances concentrated and excreted in urine.

3.2. Scenario (about Histology of the lower urinary system):

A 65-year-old man presents with painless hematuria. Urinalysis shows numerous red blood cells, but no casts. Cystoscopy reveals a mass protruding into the bladder lumen. A biopsy is obtained for histological evaluation, revealing transitional epithelial cells forming irregular papillary structures.

MCQ #1:
Which of the following histological features is characteristic of normal transitional epithelium lining the bladder?
A) Presence of numerous goblet cells
B) Keratinized squamous cells
C) Dome-shaped superficial cells (umbrella cells)
D) Simple columnar epithelial cells
E) Presence of cilia on the apical surface
**Correct Answer: C**
Rationale (1-2 sentences): Normal urothelium (transitional epithelium) lining the urinary bladder is characterized by dome-shaped superficial cells (umbrella cells) that protect underlying tissues from urine and allow stretch.

MCQ #2:
Histological examination of the patient's bladder mass reveals invasive carcinoma cells extending beyond the basement membrane. Which histological feature distinguishes invasive carcinoma from carcinoma in situ?
A) Loss of polarity of transitional epithelial cells
B) Increased mitotic figures in superficial cells
C) Invasion through the basement membrane
D) Presence of transitional cells with nuclear enlargement
E) Papillary architecture of epithelial growth
**Correct Answer: C**
Rationale (1-2 sentences): Invasion through the basement membrane differentiates invasive carcinoma from carcinoma in situ, which remains confined to the epithelium.

MCQ #3:
The lamina propria of the bladder wall typically contains which of the following histological structures?
A) Skeletal muscle fibers
B) Dense irregular connective tissue without blood vessels
C) Smooth muscle arranged in distinct layers
D) Loose connective tissue with blood vessels and nerves
E) Elastic cartilage
**Correct Answer: D**
Rationale (1-2 sentences): The lamina propria of the bladder wall consists of loose connective tissue rich in blood vessels and nerves, which allows it to support bladder distension.

3.3. Scenario (Histology of the lower urinary system):

A 65-year-old man presents to the clinic complaining of painless hematuria for the past two weeks. Urinalysis confirms the presence of red blood cells. Cystoscopy reveals a small mass on the posterior bladder wall, which biopsy identifies as transitional cell carcinoma. The medical student reviewing the biopsy notes key histological features typical of the lower urinary tract.

MCQ #1:
Which of the following histological features is characteristic of normal urothelium?
A) Single layer of cuboidal cells
B) Stratified squamous epithelium
C) Transitional epithelium with umbrella cells
D) Pseudostratified columnar epithelium with cilia
E) Simple columnar epithelium with goblet cells
Correct Answer: C
Rationale (1-2 sentences): The normal lining of the lower urinary system is transitional epithelium, characterized by large dome-shaped "umbrella cells," which protect underlying tissue by accommodating changes in bladder volume.

MCQ #2:
Which histological layer of the bladder wall contains bundles of smooth muscle essential for bladder contraction?
A) Mucosa
B) Lamina propria
C) Submucosa
D) Muscularis propria (detrusor muscle)
E) Adventitia
Correct Answer: D
Rationale (1-2 sentences): The muscularis propria, composed of detrusor muscle, is critical for bladder contraction and urine expulsion.

MCQ #3:
A biopsy of transitional cell carcinoma from the bladder wall most likely demonstrates abnormal cells predominantly arising from which histological layer?
A) Muscularis propria
B) Transitional epithelium (urothelium)
C) Lamina propria
D) Submucosa
E) Adventitia
Correct Answer: B
Rationale (1-2 sentences): Transitional cell carcinoma originates primarily from the transitional epithelium (urothelium), which lines the bladder and lower urinary tract.

# Deep Seek

1.1. Scenario [Histology of Renal corpuscle]:

A 45-year-old male with a history of hypertension presents with proteinuria and hematuria. A renal biopsy is performed, and the histology reveals thickening of the glomerular basement membrane (GBM) and effacement of podocyte foot processes.

**MCQ #1:**
Which of the following structures is primarily responsible for the filtration of blood in the renal corpuscle?
A) Proximal convoluted tubule
B) Distal convoluted tubule
C) Glomerular basement membrane
D) Loop of Henle
E) Collecting duct

**Correct Answer: C**
**Rationale:** The glomerular basement membrane (GBM) is a key component of the filtration barrier in the renal corpuscle, allowing selective filtration of blood based on size and charge.

**MCQ #2:**
Which of the following cell types is most likely affected by the effacement of foot processes in this patient?
A) Mesangial cells
B) Endothelial cells
C) Podocytes
D) Juxtaglomerular cells
E) Intercalated cells

**Correct Answer: C**
**Rationale:** Podocytes are specialized epithelial cells with foot processes that interdigitate to form filtration slits. Effacement of these foot processes is a hallmark of podocyte injury, often seen in proteinuric conditions.

**MCQ #3:**
Which of the following histological changes is most consistent with this patient's clinical presentation?
A) Proliferation of mesangial cells
B) Thickening of the GBM
C) Atrophy of the proximal tubule
D) Hypertrophy of the juxtaglomerular apparatus
E) Dilatation of Bowman's capsule

**Correct Answer: B**
**Rationale:** Thickening of the GBM is a common finding in conditions like hypertensive nephropathy and diabetic glomerulosclerosis, which can present with proteinuria and hematuria.

1.2. Scenario [Histology of Renal corpuscle]:

A 30-year-old female presents with nephrotic syndrome. A renal biopsy shows diffuse effacement of podocyte foot processes and no significant immune complex deposition.

**MCQ #1:**
Which of the following is the most likely diagnosis based on the histology?
A) Minimal change disease
B) Membranous glomerulonephritis
C) IgA nephropathy
D) Focal segmental glomerulosclerosis
E) Lupus nephritis

**Correct Answer: A**
**Rationale:** Minimal change disease is characterized by diffuse effacement of podocyte foot processes on electron microscopy without significant immune complex deposition or GBM thickening.

**MCQ #2:**
Which of the following structures is primarily responsible for maintaining the selective permeability of the glomerular filtration barrier?
A) Mesangial matrix
B) Podocyte foot processes
C) Endothelial fenestrations
D) Juxtaglomerular apparatus
E) Proximal tubule brush border

**Correct Answer: B**
**Rationale:** Podocyte foot processes, along with the GBM and endothelial fenestrations, form the glomerular filtration barrier. The foot processes play a critical role in maintaining selective permeability.

**MCQ #3:**
Which of the following is the most common clinical presentation of minimal change disease?
A) Hematuria and hypertension
B) Proteinuria and hypoalbuminemia
C) Hyperkalemia and metabolic acidosis
D) Polyuria and polydipsia
E) Hematuria and renal colic

**Correct Answer: B**
**Rationale:** Minimal change disease typically presents with nephrotic syndrome, characterized by significant proteinuria, hypoalbuminemia, edema, and hyperlipidemia.

1.3. Scenario [Histology of Renal corpuscle]:

A 60-year-old male with a history of diabetes mellitus presents with worsening renal function. A renal biopsy reveals nodular glomerulosclerosis and thickening of the GBM.

**MCQ #1:**
Which of the following histological findings is most characteristic of diabetic nephropathy?
A) Crescent formation in Bowman's space
B) Nodular glomerulosclerosis
C) Linear IgG deposition along the GBM
D) Subepithelial immune complex deposits
E) Diffuse mesangial cell proliferation

**Correct Answer: B**
**Rationale:** Nodular glomerulosclerosis, also known as Kimmelstiel-Wilson lesions, is a hallmark of diabetic nephropathy.

**MCQ #2:**
Which of the following components of the renal corpuscle is primarily affected by diabetic nephropathy?
A) Juxtaglomerular apparatus
B) Mesangial matrix
C) Distal convoluted tubule
D) Collecting duct
E) Loop of Henle

**Correct Answer: B**
**Rationale:** In diabetic nephropathy, the mesangial matrix expands due to the accumulation of extracellular matrix components, leading to glomerulosclerosis.

**MCQ #3:**
Which of the following is the most likely mechanism contributing to GBM thickening in diabetic nephropathy?
A) Immune complex deposition
B) Non-enzymatic glycosylation of proteins
C) Complement activation
D) Podocyte proliferation
E) Endothelial cell hypertrophy

**Correct Answer: B**
**Rationale:** Non-enzymatic glycosylation of proteins, a consequence of chronic hyperglycemia, leads to the thickening of the GBM and other structural changes in diabetic nephropathy.

2.1. Scenario [Histology of the nephron]:

A 45-year-old male with a history of hypertension presents with worsening fatigue and swelling in his legs. Laboratory tests reveal elevated serum creatinine and proteinuria. A renal biopsy is performed, and histology shows thickening of the glomerular basement membrane (GBM) and effacement of podocyte foot processes.

**MCQ #1:**
Which of the following structures is primarily responsible for the filtration of blood in the nephron?
A) Proximal convoluted tubule
B) Distal convoluted tubule
C) Glomerulus
D) Loop of Henle
E) Collecting duct
**Correct Answer: C**
**Rationale:** The glomerulus, composed of capillaries surrounded by Bowman's capsule, is the primary site of blood filtration in the nephron.

**MCQ #2:**
Which histological finding in this patient’s biopsy is most consistent with proteinuria?
A) Thickening of the GBM
B) Effacement of podocyte foot processes
C) Atrophy of the proximal tubule
D) Hyalinization of the afferent arteriole
E) Dilatation of the collecting duct
**Correct Answer: B**
**Rationale:** Effacement of podocyte foot processes disrupts the filtration barrier, leading to proteinuria.

**MCQ #3:**
Which of the following cells is most directly involved in maintaining the glomerular filtration barrier?
A) Mesangial cells
B) Juxtaglomerular cells
C) Podocytes
D) Principal cells
E) Intercalated cells
**Correct Answer: C**
**Rationale:** Podocytes, with their interdigitating foot processes, are critical components of the glomerular filtration barrier.

2.2. Scenario [Histology of the nephron]:

A 30-year-old female presents with recurrent kidney stones. Imaging reveals calcium oxalate stones. A renal biopsy shows interstitial fibrosis and tubular atrophy. Histology of the nephron reveals dilated tubules with intraluminal crystals.

**MCQ #1:**
Which part of the nephron is most likely to show intraluminal crystals in this patient?
A) Glomerulus
B) Proximal convoluted tubule
C) Distal convoluted tubule
D) Loop of Henle
E) Collecting duct
**Correct Answer: B**
**Rationale:** The proximal convoluted tubule is the primary site of reabsorption and is often affected by crystal deposition in conditions like nephrolithiasis.

**MCQ #2:**
Which of the following histological changes is most likely associated with chronic kidney disease in this patient?
A) Glomerular hypercellularity
B) Interstitial fibrosis
C) Effacement of podocyte foot processes
D) Thickening of the GBM
E) Hyalinization of the afferent arteriole
**Correct Answer: B**
**Rationale:** Interstitial fibrosis is a hallmark of chronic kidney disease and reflects progressive renal damage.

**MCQ #3:**
Which of the following structures is primarily responsible for the concentration of urine?
A) Proximal convoluted tubule
B) Distal convoluted tubule
C) Loop of Henle
D) Collecting duct
E) Glomerulus
**Correct Answer: C**
**Rationale:** The Loop of Henle, particularly the thick ascending limb, plays a key role in establishing the medullary concentration gradient necessary for urine concentration.

2.3. Scenario [Histology of the nephron]:

A 60-year-old male with diabetes mellitus presents with nephrotic syndrome. A renal biopsy reveals nodular glomerulosclerosis (Kimmelstiel-Wilson nodules) and hyalinization of arterioles.

**MCQ #1:**
Which of the following histological findings is most characteristic of diabetic nephropathy?
A) Crescent formation
B) Nodular glomerulosclerosis
C) Diffuse mesangial expansion
D) Tubular atrophy
E) Interstitial inflammation
**Correct Answer: B**
**Rationale:** Nodular glomerulosclerosis (Kimmelstiel-Wilson nodules) is a pathognomonic feature of diabetic nephropathy.

**MCQ #2:**
Which of the following structures is most likely affected by hyalinization in this patient?
A) Glomerular capillaries
B) Afferent and efferent arterioles
C) Proximal convoluted tubule
D) Loop of Henle
E) Collecting duct
**Correct Answer: B**
**Rationale:** Hyalinization of arterioles, particularly the afferent and efferent arterioles, is a common finding in diabetic nephropathy.

**MCQ #3:**
Which of the following cells is primarily responsible for the production of erythropoietin in the kidney?
A) Podocytes
B) Mesangial cells
C) Juxtaglomerular cells
D) Interstitial fibroblasts
E) Principal cells
**Correct Answer: D**
**Rationale:** Interstitial fibroblasts in the renal cortex and outer medulla are the primary producers of erythropoietin.

3.1. Scenario [Histology of the lower urinary system]:

A 55-year-old male presents with hematuria and dysuria. Cystoscopy reveals a papillary tumor in the bladder. A biopsy is taken, and histology shows transitional epithelium with cellular atypia and mitotic figures.

**MCQ #1:**
Which of the following best describes the normal histology of the bladder mucosa?
A) Stratified squamous epithelium
B) Simple columnar epithelium
C) Transitional epithelium
D) Pseudostratified ciliated epithelium
E) Simple squamous epithelium

**Correct Answer: C**
**Rationale:** The bladder mucosa is lined by transitional epithelium (urothelium), which is specialized to stretch and accommodate urine volume changes.

**MCQ #2:**
What histological feature is most concerning for malignancy in this patient’s biopsy?
A) Presence of goblet cells
B) Cellular atypia and mitotic figures
C) Thick basement membrane
D) Abundant keratin pearls
E) Lack of umbrella cells

**Correct Answer: B**
**Rationale:** Cellular atypia and mitotic figures are hallmarks of dysplasia and malignancy in transitional epithelium, suggesting urothelial carcinoma.

**MCQ #3:**
Which of the following structures is most likely to be affected if the tumor invades beyond the bladder mucosa?
A) Lamina propria
B) Adventitia
C) Detrusor muscle
D) Renal cortex
E) Ureteral lumen

**Correct Answer: C**
**Rationale:** The detrusor muscle lies beneath the lamina propria and is the next layer invaded in advanced bladder cancer, affecting bladder function.

3.2. Scenario [Histology of the lower urinary system]:

A 30-year-old female presents with recurrent urinary tract infections (UTIs). A urine cytology sample shows numerous neutrophils and bacteria. Histology of the bladder wall reveals inflammation and thinning of the transitional epithelium.

**MCQ #1:**
Which of the following is the primary histological defense mechanism of the bladder against infection?
A) Mucous secretion by goblet cells
B) Tight junctions between epithelial cells
C) Presence of microvilli on the luminal surface
D) A thick layer of keratinized cells
E) Abundant cilia on the apical surface

**Correct Answer: B**
**Rationale:** Tight junctions between urothelial cells prevent bacterial invasion into the underlying tissues, serving as a key defense mechanism.

**MCQ #2:**
What histological change is most likely associated with chronic UTIs in this patient?
A) Hyperplasia of transitional epithelium
B) Metaplasia to stratified squamous epithelium
C) Atrophy of transitional epithelium
D) Increased number of umbrella cells
E) Formation of renal calculi

**Correct Answer: B**
**Rationale:** Chronic irritation from recurrent UTIs can lead to squamous metaplasia, a protective but abnormal change in the epithelium.

**MCQ #3:**
Which of the following cell types is most characteristic of the luminal surface of the bladder epithelium?
A) Goblet cells
B) Umbrella cells
C) Basal cells
D) Parietal cells
E) Podocytes

**Correct Answer: B**
**Rationale:** Umbrella cells are large, specialized cells on the luminal surface of transitional epithelium that provide a barrier to urine.

3.3. Scenario [Histology of the lower urinary system]:

A 60-year-old male with a history of smoking presents with painless hematuria. Histology of a bladder biopsy shows nests of malignant cells invading the lamina propria. These cells stain positively for cytokeratin.

**MCQ #1:**
Which of the following is the most likely diagnosis based on the histology?
A) Squamous cell carcinoma
B) Adenocarcinoma
C) Urothelial carcinoma
D) Small cell carcinoma
E) Renal cell carcinoma

**Correct Answer: C**
**Rationale:** Urothelial carcinoma (transitional cell carcinoma) is the most common bladder cancer and arises from the transitional epithelium.

**MCQ #2:**
Which of the following histological features is most specific to urothelial carcinoma?
A) Keratin pearls
B) Glandular structures
C) Nests of malignant cells
D) Psammoma bodies
E) Rosette formation

**Correct Answer: C**
**Rationale:** Urothelial carcinoma often shows nests of malignant cells invading the lamina propria or deeper layers.

**MCQ #3:**
What is the primary risk factor for the development of this patient’s condition?
A) High-protein diet
B) Chronic alcohol use
C) Smoking
D) Prolonged use of NSAIDs
E) Frequent UTIs

**Correct Answer: C**
**Rationale:** Smoking is the most significant risk factor for urothelial carcinoma due to exposure to carcinogens in tobacco smoke.

# Deep Seek- Deep though-R1

**1.1. Scenario [Histology of Renal corpuscle]:**
A 45-year-old male presents with edema, hypoalbuminemia, and proteinuria. Renal biopsy reveals effacement of foot processes on electron microscopy.

**MCQ #1:**
Which histological layers of the renal corpuscle are critical for filtration?
A) Podocytes, mesangial cells, parietal epithelium
B) Fenestrated endothelium, basement membrane, podocyte foot processes
C) Macula densa, juxtaglomerular cells, lacis cells
D) Proximal tubule, loop of Henle, collecting duct
E) Afferent arteriole, efferent arteriole, vasa recta
**Correct Answer: B**
**Rationale:** The filtration barrier consists of fenestrated capillary endothelium, the glomerular basement membrane, and podocyte foot processes. These layers selectively filter plasma.

**MCQ #2:**
Damage to which cell type is most directly linked to the patient’s proteinuria?
A) Endothelial cells
B) Parietal epithelial cells
C) Podocytes
D) Mesangial cells
E) Macula densa cells
**Correct Answer: C**
**Rationale:** Podocyte foot process effacement disrupts the filtration barrier, allowing protein leakage into urine (proteinuria).

**MCQ #3:**
Which staining method would best highlight the basement membrane in the renal corpuscle?
A) H&E
B) PAS (Periodic acid-Schiff)
C) Wright stain
D) Oil Red O
E) Gram stain
**Correct Answer: B**
**Rationale:** PAS stains carbohydrate-rich structures like the glomerular basement membrane, making it visible under light microscopy.

**1.2. Scenario [Histology of Renal corpuscle]:**

A 60-year-old female with uncontrolled hypertension develops hematuria and elevated serum creatinine. Biopsy shows thickened arteriolar walls and mesangial expansion.

**MCQ #1:**
Which vascular structure in the renal corpuscle is most affected by hypertensive damage?
A) Efferent arteriole
B) Vasa recta
C) Peritubular capillaries
D) Afferent arteriole
E) Arcuate artery
**Correct Answer: D**
**Rationale:** Hyaline arteriolosclerosis in hypertension primarily affects the afferent arteriole, reducing glomerular perfusion.

**MCQ #2:**
Mesangial expansion in this patient would impair which function?
A) Filtration barrier integrity
B) Blood flow regulation in capillaries
C) Sodium reabsorption in the tubule
D) Erythropoietin production
E) Urine acidification
**Correct Answer: B**
**Rationale:** Mesangial cells regulate capillary lumen diameter and blood flow; their expansion disrupts this function.

**MCQ #3:**
Which histological change is characteristic of hypertensive nephropathy?
A) Neutrophilic infiltration
B) Crescent formation
C) Nodular glomerulosclerosis
D) Hyaline deposits in arterioles
E) Subepithelial immune deposits
**Correct Answer: D**
**Rationale:** Hyaline arteriolosclerosis (hyaline deposits in arteriolar walls) is a hallmark of chronic hypertension.

**1.3. Scenario [Histology of Renal corpuscle]:**
A 25-year-old female with systemic lupus erythematosus (SLE) develops hematuria and red blood cell casts. Renal biopsy shows “wire-loop” lesions and immune complex deposits.

**MCQ #1:**
Where are immune complexes most likely deposited in lupus nephritis?
A) Subendothelial space
B) Podocyte cytoplasm
C) Mesangial matrix
D) Parietal epithelium
E) Tubular lumen
**Correct Answer: A**
**Rationale:** Lupus nephritis classically involves subendothelial immune deposits, visible as “wire-loop” lesions on histology.

**MCQ #2:**
Which cell type proliferates in response to these deposits?
A) Parietal epithelial cells
B) Podocytes
C) Mesangial cells
D) Endothelial cells
E) Juxtaglomerular cells
**Correct Answer: C**
**Rationale:** Mesangial cells proliferate and expand due to immune complex-mediated inflammation in SLE.

**MCQ #3:**
Which immunofluorescence pattern is typical in lupus nephritis?
A) Linear IgG
B) Granular IgA
C) Full-house (IgG, IgA, IgM, C3)
D) Fibrin-only
E) Staining of tubular basement membrane
**Correct Answer: C**
**Rationale:** Lupus nephritis often shows “full-house” immunofluorescence with IgG, IgA, IgM, and complement (C3) deposits.

**2.1. Scenario [Histology of the nephron]:**
A 55-year-old male presents with edema, hypoalbuminemia, and heavy proteinuria. Renal biopsy reveals effacement of podocyte foot processes on electron microscopy.

**MCQ #1:**
Damage to which glomerular structure is most directly responsible for proteinuria in this patient?
A) Mesangial cells
B) Parietal epithelium
C) Podocytes
D) Endothelial cells
E) Basement membrane
**Correct Answer: C**
**Rationale:** Podocytes form slit diaphragms critical for filtration barrier integrity. Foot process effacement disrupts this barrier, leading to proteinuria.

**MCQ #2:**
Which histological feature is unique to the renal corpuscle?
A) Brush border
B) Podocytes
C) Simple squamous epithelium
D) Microvilli
E) Intercalated cells
**Correct Answer: B**
**Rationale:** Podocytes are specialized cells lining Bowman’s capsule, unique to the glomerulus. Brush border and microvilli are seen in proximal tubules.

**MCQ #3:**
What electron microscopy finding correlates with minimal change disease?
A) Immune complex deposits
B) Thickened basement membrane
C) Effacement of foot processes
D) Mesangial proliferation
E) Subepithelial "spikes"
**Correct Answer: C**
**Rationale:** Minimal change disease is characterized by podocyte foot process effacement without immune deposits or structural basement membrane changes.

**2.2. Scenario [Histology of the nephron]:**
A 40-year-old woman with sepsis develops acute kidney injury. Urinalysis shows muddy brown casts. Renal biopsy demonstrates necrosis of tubular epithelial cells with denuded basement membranes.

**MCQ #1:**
Which nephron segment is most susceptible to ischemic injury in acute tubular necrosis (ATN)?
A) Distal convoluted tubule
B) Loop of Henle
C) Proximal convoluted tubule
D) Collecting duct
E) Glomerulus
**Correct Answer: C**
**Rationale:** Proximal tubules have high metabolic demand due to active reabsorption, making them vulnerable to ischemia.

**MCQ #2:**
Which histological feature is characteristic of the proximal convoluted tubule?
A) Barely visible nuclei
B) Prominent brush border
C) Clear cell boundaries
D) Flat epithelial cells
E) Few mitochondria
**Correct Answer: B**
**Rationale:** Proximal tubules have a prominent brush border (microvilli) to maximize reabsorption.

**MCQ #3:**
Muddy brown casts in ATN primarily result from:
A) Sloughed podocytes
B) Accumulated Tamm-Horsfall protein
C) Cellular debris from necrotic tubules
D) Red blood cells
E) Leukocyte aggregates
**Correct Answer: C**
**Rationale:** Necrotic tubular epithelial cells shed into the lumen, forming granular casts seen in ATN.

**2.3. Scenario [Histology of the nephron]:**
A 25-year-old male presents with polyuria and polydipsia. Lab tests show hypernatremia and dilute urine. A defect in the collecting duct’s response to ADH is suspected.

**MCQ #1:**
Which cells in the collecting duct are responsible for ADH-regulated water reabsorption?
A) Intercalated cells
B) Principal cells
C) Podocytes
D) Juxtaglomerular cells
E) Mesangial cells
**Correct Answer: B**
**Rationale:** Principal cells express aquaporin-2 channels, which insert into the membrane in response to ADH to permit water reabsorption.

**MCQ #2:**
Which histological feature distinguishes the collecting duct from the proximal tubule?
A) Simple cuboidal epithelium
B) Microvilli
C) Prominent nuclei with visible cell borders
D) Eosinophilic cytoplasm
E) Brush border
**Correct Answer: C**
**Rationale:** Collecting ducts have distinct cell borders and pale cytoplasm, unlike the densely packed microvilli (brush border) of proximal tubules.

**MCQ #3:**
Central diabetes insipidus is caused by a lack of:
A) Aldosterone
B) Renin
C) ADH
D) Angiotensin II
E) Atrial natriuretic peptide
**Correct Answer: C**
**Rationale:** Central diabetes insipidus results from ADH deficiency, impairing water reabsorption in the collecting ducts.

3.1. Scenario [Histology of the lower urinary system]:
A 65-year-old male presents with recurrent urinary tract infections and difficulty voiding. Cystoscopy reveals thickened bladder walls with areas of mucosal ulceration. A biopsy shows denuded urothelium and chronic inflammation.

MCQ #1:
Which histological feature is most characteristic of the normal bladder mucosa?
A) Stratified squamous epithelium
B) Pseudostratified columnar epithelium
C) Transitional epithelium (urothelium)
D) Simple cuboidal epithelium
E) Keratinized epithelium
Correct Answer: C
Rationale: The bladder mucosa is lined by transitional epithelium (urothelium), which stretches to accommodate urine volume.

MCQ #2:
Which layer of the bladder wall contains interlacing smooth muscle bundles responsible for contraction during micturition?
A) Lamina propria
B) Muscularis mucosae
C) Submucosa
D) Muscularis propria (detrusor muscle)
E) Adventitia
Correct Answer: D
Rationale: The muscularis propria (detrusor muscle) consists of smooth muscle bundles that contract to expel urine.

MCQ #3:
Chronic cystitis in this patient is associated with loss of which protective urothelial feature?
A) Tight junctions
B) Mucin-secreting goblet cells
C) Umbrella cells with uroplakin plaques
D) Cilia on apical surfaces
E) Microvilli
Correct Answer: C
Rationale: Umbrella cells in the urothelium have uroplakin plaques that form a permeability barrier; their loss increases infection risk.

3.2. Scenario [Histology of the lower urinary system]:
A 50-year-old female presents with painless hematuria. Imaging shows a papillary mass in the renal pelvis. Biopsy reveals malignant cells forming irregular papillary structures with hyperchromatic nuclei.

MCQ #1:
The tumor most likely originates from which epithelial type?
A) Stratified squamous epithelium
B) Transitional epithelium
C) Simple columnar epithelium
D) Pseudostratified ciliated epithelium
E) Keratinized epithelium
Correct Answer: B
Rationale: Transitional cell carcinoma arises from the urothelium, commonly affecting the renal pelvis, ureter, or bladder.

MCQ #2:
Which histological layer must the tumor invade to be classified as "invasive" rather than "non-invasive"?
A) Lamina propria
B) Muscularis mucosae
C) Submucosa
D) Muscularis propria
E) Adventitia
Correct Answer: A
Rationale: Invasion beyond the basement membrane into the lamina propria defines invasive transitional cell carcinoma.

MCQ #3:
Which protein is typically expressed in the apical membrane of normal urothelial umbrella cells but lost in high-grade tumors?
A) Cytokeratin
B) Uroplakin
C) Vimentin
D) Desmin
E) Actin
Correct Answer: B
Rationale: Uroplakin is a marker of differentiated umbrella cells; its loss correlates with tumor aggressiveness.

3.3. Scenario [Histology of the lower urinary system]:
A 30-year-old male with a history of urethral catheterization develops dysuria and urinary retention. Urethroscopy demonstrates a narrowed lumen with scarred mucosa.

MCQ #1:
Which epithelial type lines the distal portion of the male urethra?
A) Transitional epithelium
B) Stratified squamous epithelium
C) Simple columnar epithelium
D) Pseudostratified columnar epithelium
E) Cuboidal epithelium
Correct Answer: B
Rationale: The distal male urethra near the external orifice is lined by stratified squamous epithelium for abrasion resistance.

MCQ #2:
Post-instrumentation urethral strictures result from fibrosis in which layer?
A) Urothelium
B) Lamina propria
C) Submucosal connective tissue
D) Muscularis propria
E) Adventitia
Correct Answer: C
Rationale: Strictures arise from submucosal connective tissue fibrosis, narrowing the lumen.

MCQ #3:
Which cell type is responsible for regenerating the urethral epithelium after injury?
A) Goblet cells
B) Basal cells
C) Umbrella cells
D) Plasma cells
E) Fibroblasts
Correct Answer: B
Rationale: Basal cells in the stratified epithelium serve as stem cells for epithelial regeneration.

# Gemini

**1.1. Scenario [Histology of Renal corpuscle]:**

A 35-year-old male presents with hematuria and proteinuria. A renal biopsy is performed. Histological examination reveals increased cellularity within the glomeruli and thickening of the glomerular basement membrane. Immunofluorescence microscopy shows deposition of immune complexes.

**MCQ #1:** Which of the following structures is primarily involved in the filtration process within the renal corpuscle?

A) Mesangial cells

B) Juxtaglomerular apparatus

C) Bowman's capsule

D) Glomerular capillaries

E) Distal convoluted tubule

**Correct Answer:** D **Rationale:** The glomerular capillaries, with their specialized fenestrated endothelium, are the primary site of filtration.

**MCQ #2:** Increased cellularity within the glomerulus in this scenario is most likely due to proliferation of which cell type?

A) Parietal epithelial cells

B) Podocytes

C) Mesangial cells

D) Endothelial cells

E) Cells of the macula densa

**Correct Answer:** C and D **Rationale:** In glomerulonephritis, both mesangial cells (C) and endothelial cells (D) proliferate in response to inflammation.

**MCQ #3:** Thickening of the glomerular basement membrane is a characteristic feature of which pathological process?

A) Acute tubular necrosis

B) Glomerulonephritis

C) Interstitial nephritis

D) Pyelonephritis

E) Hydronephrosis

**Correct Answer:** B **Rationale:** Thickening of the glomerular basement membrane is a common finding in various forms of glomerulonephritis due to the deposition of immune complexes and other materials.

**1.2. Scenario [Histology of Renal corpuscle]:**

A 6-year-old child presents with sudden onset of edema. Urinalysis reveals heavy proteinuria, but no hematuria. Renal biopsy is performed. Light microscopy shows normal glomeruli.

**MCQ #1:** What is the most likely diagnosis given the clinical and light microscopy findings?

A) Acute post-streptococcal glomerulonephritis

B) Minimal change disease

C) Membranous nephropathy

D) Focal segmental glomerulosclerosis

E) Diabetic nephropathy

**Correct Answer:** B **Rationale:** Normal glomeruli on light microscopy in the presence of nephrotic syndrome (heavy proteinuria and edema) is characteristic of minimal change disease.

**MCQ #2:** Electron microscopy in this case would most likely reveal which of the following?

A) Immune complex deposition

B) Fusion of podocyte foot processes

C) Thickening of the glomerular basement membrane

D) Increased mesangial matrix

E) Tubular atrophy

**Correct Answer:** B **Rationale:** Fusion of podocyte foot processes is the hallmark ultrastructural finding in minimal change disease, leading to increased permeability of the glomerular filtration barrier.

**MCQ #3:** Which component of the renal corpuscle is directly affected by the changes seen in this condition?

A) Bowman's capsule

B) Juxtaglomerular apparatus

C) Glomerular capillaries D

) Mesangial cells

E) Distal convoluted tubule

**Correct Answer:** C **Rationale:** The glomerular capillaries, specifically the podocytes and their foot processes, are the primary target in minimal change disease.

**1.3. Scenario [Histology of Renal corpuscle]:**

A 55-year-old patient with a long history of poorly controlled diabetes mellitus presents with gradually worsening proteinuria. Renal biopsy is performed. Light microscopy reveals thickening of the glomerular basement membrane and expansion of the mesangial matrix.

**MCQ #1:** Which of the following is a common early manifestation of diabetic nephropathy at the level of the renal corpuscle?

A) Decreased glomerular filtration rate

B) Increased mesangial matrix

C) Tubular necrosis

D) Interstitial inflammation

E) Hydronephrosis

**Correct Answer:** B **Rationale:** Expansion of the mesangial matrix is an early and characteristic change in diabetic nephropathy.

**MCQ #2:** The thickening of the glomerular basement membrane in diabetic nephropathy is primarily due to:

A) Deposition of immune complexes

B) Accumulation of glycated proteins

C) Proliferation of mesangial cells

D) Infiltration of inflammatory cells

E) Fibrosis of Bowman's capsule

**Correct Answer:** B **Rationale:** The thickening is largely due to the accumulation of glycated proteins and other matrix materials.

**MCQ #3:** Which of the following cell types plays a crucial role in the increased matrix deposition seen in diabetic nephropathy?

A) Parietal epithelial cells

B) Podocytes

C) Mesangial cells

D) Endothelial cells

E) Juxtaglomerular cells

**Correct Answer:** C **Rationale:** Mesangial cells are responsible for producing the extracellular matrix within the glomerulus, and their activity is altered in diabetic nephropathy, leading to increased matrix deposition.

**2.1. Scenario [Histology of the nephron]:**

A 60-year-old man with a history of hypertension presents with new-onset hematuria. A renal biopsy is performed. Microscopic examination reveals damage to the glomerular capillaries, with thickening of the basement membrane and increased mesangial matrix.

**MCQ #1:**

Which of the following structures is primarily affected in this patient's condition?

A) Proximal convoluted tubule

B) Loop of Henle

C) Distal convoluted tubule

D) Glomerulus

E) Collecting duct

**Correct Answer:** D

**Rationale:** The glomerulus is the primary site of filtration in the nephron, and the described histological changes (thickening of the basement membrane and increased mesangial matrix) are characteristic of glomerular pathology.

**MCQ #2:**

The thickening of the basement membrane in this patient is likely due to the accumulation of which of the following?

A) Hyaline

B) Amyloid

C) Immune complexes

D) Calcium oxalate crystals

E) Uric acid crystals

**Correct Answer:** C

**Rationale:** Immune complex deposition is a common cause of glomerular basement membrane thickening, as seen in various glomerular diseases.

**MCQ #3:**

Which of the following cell types is primarily responsible for maintaining the glomerular filtration barrier?

A) Parietal epithelial cells

B) Mesangial cells

C) Podocytes

D) Juxtaglomerular cells

E) Macula densa cells

**Correct Answer:** C

**Rationale:** Podocytes, with their foot processes and filtration slits, form the final layer of the glomerular filtration barrier.

**2.2. Scenario [Histology of the nephron]:**

A 25-year-old woman presents with polyuria and nocturia. Her labs show dilute urine. A defect in the function of a specific part of the nephron is suspected.

**MCQ #1:**

Which part of the nephron is primarily responsible for regulating water reabsorption and urine concentration?

A) Proximal convoluted tubule

B) Loop of Henle

C) Distal convoluted tubule and collecting duct

D) Juxtaglomerular apparatus

E) Vasa recta

**Correct Answer:** C

**Rationale:** The distal convoluted tubule and collecting duct, under the influence of ADH, play a crucial role in regulating water reabsorption and thus urine concentration.

**MCQ #2:**

Which of the following histological features is characteristic of the cells lining the proximal convoluted tubule, reflecting their primary function?

A) Abundant microvilli (brush border)

B) Sparse mitochondria

C) Tight junctions only at the apical surface

D) Cuboidal cells with minimal cytoplasm

E) Lack of a basement membrane

**Correct Answer:** A

**Rationale:** The proximal convoluted tubule's cells have a prominent brush border (microvilli) to increase surface area for reabsorption.

**MCQ #3:**

The countercurrent exchange system, crucial for concentrating urine, is primarily established by which structure?

A) Proximal convoluted tubule

B) Distal convoluted tubule

C) Loop of Henle

D) Collecting duct

E) Renal corpuscle

**Correct Answer:** C

**Rationale:** The loop of Henle, with its descending and ascending limbs, establishes the concentration gradient in the renal medulla, essential for the countercurrent exchange system.

**2.3. Scenario [Histology of the nephron]:**

A 55-year-old man with diabetes mellitus presents with chronic kidney disease. His renal function is progressively declining. Histological examination of a kidney biopsy might show changes in the structure of certain cells within the nephron.

**MCQ #1:**

Which cells of the nephron are primarily responsible for the production of renin?

A) Mesangial cells

B) Juxtaglomerular cells

C) Podocytes

D) Macula densa cells

E) Intercalated cells

**Correct Answer:** B

**Rationale:** Juxtaglomerular cells, located in the afferent arteriole near the glomerulus, produce and release renin.

**MCQ #2:**

The macula densa cells play a role in regulating:

A) Glomerular filtration rate

B) Sodium reabsorption in the proximal tubule

C) Potassium secretion in the distal tubule

D) Water reabsorption in the collecting duct

E) Renin release

**Correct Answer:** E

**Rationale:** Macula densa cells sense sodium concentration in the distal tubule and signal to the juxtaglomerular cells to regulate renin release.

**MCQ #3:**

Which part of the nephron is impermeable to water even in the presence of ADH?

A) Proximal convoluted tubule

B) Descending limb of the loop of Henle

C) Ascending limb of the loop of Henle

D) Distal convoluted tubule

E) Collecting duct

**Correct Answer:** C

**Rationale:** The ascending limb of the loop of Henle is impermeable to water, regardless of ADH levels, contributing to the establishment of the medullary concentration gradient.

**3.1. Scenario [Histology of the lower urinary system]:**

A 25-year-old female presents with dysuria, frequency, and urgency. A urine analysis reveals numerous bacteria and white blood cells. The infection is localized to the bladder.

**MCQ #1:** Which of the following epithelial types is most commonly found lining the lumen of the bladder?

A) Simple squamous

B) Stratified squamous

C) Transitional

D) Pseudostratified columnar

E) Simple cuboidal

**Correct Answer:** C **Rationale:** The bladder is lined by transitional epithelium, which allows for distension as the bladder fills.

**MCQ #2:** The lamina propria of the bladder contains which of the following?

A) Detrusor muscle

B) Urothelium

C) Blood vessels and nerves

D) Renal corpuscles

E) Stratified squamous epithelium

**Correct Answer:** C **Rationale:** The lamina propria, supporting layer of the bladder, contains the blood vessels, nerves, and lymphatics that supply the bladder.

**MCQ #3:** Which of the following histological features helps the ureters prevent backflow of urine?

A) A thick layer of skeletal muscle

B) Transitional epithelium and longitudinal smooth muscle

C) A stratified squamous epithelium with keratin

D) A single layer of cuboidal cells

E) Numerous goblet cells

**Correct Answer:** B **Rationale:** The ureters utilize transitional epithelium and layers of longitudinal smooth muscle to facilitate urine transport and prevent reflux.

**3.2. Scenario [Histology of the lower urinary system]:**

A 45-year-old male presents with severe flank pain radiating to the groin. Imaging reveals a kidney stone lodged in the ureter.

**MCQ #1:** The most common type of kidney stone is composed of:

A) Uric acid

B) Calcium oxalate

C) Struvite

D) Cystine

E) Calcium phosphate

**Correct Answer:** B **Rationale:** Calcium oxalate stones are the most prevalent type of kidney stones.

**MCQ #2:** Which part of the urinary system is most commonly affected by kidney stones?

A) Renal pelvis

B) Ureter

C) Bladder

D) Urethra

E) Prostate

**Correct Answer:** B **Rationale:** Kidney stones often lodge in the ureter due to its narrow lumen.

**MCQ #3:** The epithelium lining the ureter is characterized by which of the following features?

A) Keratinization

B) Cilia

C) Distensibility

D) Stratified layers with tight junctions

E) Numerous goblet cells

**Correct Answer:** C **Rationale:** The transitional epithelium lining the ureter allows for distension as urine and stones pass.

**3.3. Scenario [Histology of the lower urinary system]:**

A 60-year-old male presents with difficulty initiating urination, weak urine stream, and nocturia. A digital rectal exam reveals an enlarged prostate.

**MCQ #1:** Benign prostatic hyperplasia primarily affects which part of the prostate gland?

A) Peripheral zone

B) Central zone

C) Transition zone

D) Fibromuscular stroma

E) Capsule

**Correct Answer:** C **Rationale:** BPH originates in the transition zone of the prostate.

**MCQ #2:** Which of the following is a key histological finding in BPH?

A) Increased number of glandular epithelial cells and stroma

B) Malignant cells invading the surrounding tissue

C) Atrophy of the glandular epithelium

D) Inflammatory infiltrates within the prostate

E) Calcification of the prostatic ducts

**Correct Answer:** A **Rationale:** BPH involves hyperplasia, or an increase in the number of cells, in both the glandular epithelium and the stroma of the prostate.

**MCQ #3:** The prostate gland surrounds which structure?

A) Ureter

B) Bladder neck

C) Urethra

D) Seminal vesicles

E) Vas deferens

**Correct Answer:** C **Rationale:** The prostate gland surrounds the urethra, which explains why its enlargement can lead to urinary symptoms

# Qwen 2.5 Max

1.1. Scenario [Histology of Renal corpuscle]:

A 25-year-old female presents with hematuria and proteinuria after a recent upper respiratory tract infection. Laboratory tests reveal elevated anti-streptolysin O (ASO) titers, suggesting post-streptococcal glomerulonephritis. A renal biopsy is performed to evaluate the histological changes in the renal corpuscle.

MCQ #1:

Which structure of the renal corpuscle is primarily affected in post-streptococcal glomerulonephritis?

A) Podocytes

B) Proximal convoluted tubule

C) Glomerular basement membrane

D) Distal convoluted tubule

E) Collecting duct

Correct Answer: C

Rationale: Post-streptococcal glomerulonephritis involves immune complex deposition along the glomerular basement membrane, leading to inflammation and damage to this structure. The glomerular basement membrane plays a critical role in filtration, and its disruption can result in hematuria and proteinuria.

MCQ #2:

What is the primary function of podocytes in the renal corpuscle?

A) Reabsorption of glucose

B) Secretion of hydrogen ions

C) Filtration of blood plasma

D) Concentration of urine

E) Regulation of sodium balance

Correct Answer: C

Rationale: Podocytes are specialized epithelial cells with foot processes that form filtration slits, allowing for the selective filtration of blood plasma into Bowman’s space while preventing the passage of larger molecules like proteins.

MCQ #3:

Which histological feature is most likely to be observed in the glomerulus during post-streptococcal glomerulonephritis?

A) Thickening of the glomerular basement membrane

B) Atrophy of the proximal tubule

C) Hyperplasia of the juxtaglomerular apparatus

D) Necrosis of the distal tubule

E) Dilation of the collecting ducts

Correct Answer: A

Rationale: In post-streptococcal glomerulonephritis, immune complex deposition leads to thickening of the glomerular basement membrane, which can be visualized under light microscopy as a characteristic histological finding.

1.2. Scenario [Histology of Renal corpuscle]:

A 40-year-old male with poorly controlled diabetes mellitus type 2 undergoes routine urinalysis, which reveals microalbuminuria. Over time, his condition progresses to overt proteinuria. A renal biopsy shows diffuse thickening of the glomerular basement membrane and effacement of podocyte foot processes.

MCQ #1:

What is the term used to describe the pathological process causing effacement of podocyte foot processes?

A) Mesangial proliferation

B) Tubular atrophy

C) Focal segmental glomerulosclerosis

D) Podocyte injury

E) Basement membrane duplication

Correct Answer: D

Rationale: Effacement of podocyte foot processes is a hallmark of podocyte injury, often seen in diabetic nephropathy. This structural change disrupts the filtration barrier, leading to proteinuria.

MCQ #2:

Which component of the renal corpuscle is directly responsible for maintaining the selective permeability of the filtration barrier?

A) Mesangial cells

B) Endothelial cells

C) Podocyte slit diaphragms

D) Glomerular capillary loops

E) Juxtaglomerular cells

Correct Answer: C

Rationale: Podocyte slit diaphragms, located between the foot processes of podocytes, play a crucial role in maintaining the selective permeability of the filtration barrier, preventing the loss of proteins into the filtrate.

MCQ #3:

What is the clinical significance of microalbuminuria in diabetic patients?

A) It indicates acute kidney injury.

B) It is an early marker of diabetic nephropathy.

C) It suggests urinary tract infection.

D) It reflects dehydration.

E) It is associated with hyperkalemia.

Correct Answer: B

Rationale: Microalbuminuria is an early marker of diabetic nephropathy, indicating initial damage to the glomerular filtration barrier before overt proteinuria develops.

1.3. Scenario [Histology of Renal corpuscle]:

A 60-year-old female with systemic lupus erythematosus (SLE) presents with worsening fatigue, edema, and hypertension. Laboratory findings include hypoalbuminemia, hyperlipidemia, and heavy proteinuria. A renal biopsy demonstrates "wire-loop" lesions in the glomeruli due to immune complex deposition.

MCQ #1:

What is the primary mechanism causing "wire-loop" lesions in lupus nephritis?

A) Mesangial cell proliferation

B) Deposition of immune complexes in the glomerular basement membrane

C) Necrosis of podocytes

D) Tubular backleak of proteins

E) Obstruction of the urinary tract

Correct Answer: B

Rationale: "Wire-loop" lesions in lupus nephritis result from the deposition of immune complexes within the glomerular basement membrane, leading to thickening and distortion of the capillary walls.

MCQ #2:

Which histological feature distinguishes the renal corpuscle from other parts of the nephron?

A) Presence of simple cuboidal epithelium

B) High mitochondrial content

C) Fenestrated endothelium

D) Brush border

E) Smooth muscle cells

Correct Answer: C

Rationale: The renal corpuscle contains fenestrated endothelium, which allows for the efficient filtration of plasma while preventing the passage of blood cells and large proteins.

MCQ #3:

In lupus nephritis, what is the primary consequence of immune complex deposition in the renal corpuscle?

A) Increased reabsorption of sodium

B) Impaired glomerular filtration

C) Enhanced secretion of potassium

D) Reduced urine concentration

E) Increased urine pH

Correct Answer: B

Rationale: Immune complex deposition in the renal corpuscle damages the glomerular filtration barrier, impairing its ability to filter blood effectively and leading to proteinuria and other signs of kidney dysfunction.

2.1. Scenario [Histology of the nephron]:

A 55-year-old male with a history of sepsis is admitted to the ICU. Laboratory tests reveal elevated serum creatinine and blood urea nitrogen (BUN). A renal biopsy shows damage to the proximal convoluted tubules, characterized by loss of brush border, cellular necrosis, and intraluminal casts. The pathologist emphasizes the importance of understanding the histology of the nephron to differentiate ATN from other causes of acute kidney injury.

MCQ #1:

Which histological feature is most characteristic of the proximal convoluted tubule that is lost in acute tubular necrosis?

A) Simple squamous epithelium

B) Brush border (microvilli)

C) Basal striations

D) Thick ascending limb

E) Juxtaglomerular cells

Correct Answer: B

Rationale: The proximal convoluted tubule is distinguished by its brush border, which increases surface area for reabsorption. Loss of this feature is a hallmark of acute tubular necrosis.

MCQ #2:

Which segment of the nephron is primarily affected in acute tubular necrosis?

A) Glomerulus

B) Distal convoluted tubule

C) Proximal convoluted tubule

D) Collecting duct

E) Loop of Henle

Correct Answer: C

Rationale: The proximal convoluted tubule is highly susceptible to ischemic or toxic injury due to its high metabolic activity, making it the primary site of damage in ATN.

MCQ #3:

What is the clinical significance of intraluminal casts seen in the tubules during acute tubular necrosis?

A) Indicates glomerular disease

B) Suggests obstruction of urine flow

C) Reflects sloughed epithelial cells and debris

D) Indicates overhydration

E) Represents normal histology

Correct Answer: C

Rationale: Intraluminal casts in ATN consist of sloughed epithelial cells and proteinaceous debris, reflecting tubular damage and impaired renal function.

2.2. Scenario [Histology of the nephron]:

A 60-year-old female with poorly controlled type 2 diabetes mellitus presents with progressive proteinuria and hypertension. A renal biopsy demonstrates thickening of the glomerular basement membrane and diffuse mesangial expansion. The nephrologist explains that these changes are related to the histological structure of the glomerulus and its role in filtration.

MCQ #1:

Which layer of the glomerular filtration barrier is primarily affected in diabetic nephropathy?

A) Podocyte foot processes

B) Fenestrated endothelium

C) Glomerular basement membrane

D) Mesangial cells

E) Parietal epithelium

Correct Answer: C

Rationale: In diabetic nephropathy, the glomerular basement membrane becomes thickened due to excessive deposition of extracellular matrix proteins, impairing filtration.

MCQ #2:

What is the role of podocytes in the glomerulus?

A) Secrete renin

B) Form the filtration slits between foot processes

C) Regulate blood pressure

D) Reabsorb glucose

E) Produce erythropoietin

Correct Answer: B

Rationale: Podocytes form filtration slits that prevent the passage of large proteins into the filtrate, maintaining selective permeability.

MCQ #3:

Which clinical finding is most directly associated with damage to the glomerular filtration barrier in diabetic nephropathy?

A) Hematuria

B) Proteinuria

C) Glycosuria

D) Pyuria

E) Oliguria

Correct Answer: B

Rationale: Damage to the glomerular filtration barrier results in increased permeability, allowing proteins like albumin to leak into the urine, leading to proteinuria.

2.3. Scenario [Histology of the nephron]:

A 40-year-old male with sickle cell disease presents with flank pain and decreased urine output. Imaging shows reduced blood flow to the renal medulla. The pathologist explains that the loop of Henle and vasa recta in the medulla are particularly vulnerable to hypoxia due to their unique histological arrangement.

MCQ #1:

Which part of the nephron is most susceptible to ischemic injury in the renal medulla?

A) Proximal convoluted tubule

B) Distal convoluted tubule

C) Loop of Henle

D) Collecting duct

E) Glomerulus

Correct Answer: C

Rationale: The loop of Henle in the renal medulla has a low oxygen supply, making it highly vulnerable to ischemic injury, especially in conditions like sickle cell disease.

MCQ #2:

What is the primary function of the vasa recta in the renal medulla?

A) Filtration of blood

B) Maintenance of the medullary osmotic gradient

C) Secretion of hydrogen ions

D) Reabsorption of glucose

E) Production of erythropoietin

Correct Answer: B

Rationale: The vasa recta maintain the medullary osmotic gradient by countercurrent exchange, which is essential for water reabsorption in the loop of Henle.

MCQ #3:

Why is the renal medulla particularly prone to ischemia?

A) High oxygen demand

B) Low blood flow and high metabolic activity

C) Presence of fenestrated capillaries

D) Absence of mitochondria

E) Excessive sodium reabsorption

Correct Answer: B

Rationale: The renal medulla has low blood flow and high metabolic activity, creating a hypoxic environment that predisposes it to ischemic injury.

3.1. Scenario [Histology of the lower urinary system]:

A 55-year-old male presents with difficulty urinating and a weak urine stream. A digital rectal exam reveals an enlarged prostate. A biopsy of the prostate is performed, and histological examination shows hyperplasia of both glandular and stromal components.

MCQ #1:

Which histological feature is most characteristic of benign prostatic hyperplasia (BPH)?

A) Atrophy of glandular tissue

B) Hyperplasia of both glandular and stromal components

C) Squamous metaplasia

D) Necrosis of prostatic tissue

E) Fibrosis of the stroma

Correct Answer: B

Rationale: Benign prostatic hyperplasia (BPH) is characterized by the proliferation of both glandular and stromal elements within the prostate, leading to enlargement and urinary obstruction symptoms.

MCQ #2:

Which zone of the prostate is most commonly affected in benign prostatic hyperplasia (BPH)?

A) Peripheral zone

B) Central zone

C) Transition zone

D) Anterior fibromuscular stroma

E) Basal zone

Correct Answer: C

Rationale: The transition zone is the primary site of benign prostatic hyperplasia (BPH), where the glandular and stromal hyperplasia occurs, leading to compression of the urethra.

MCQ #3:

What is the clinical significance of identifying hyperplasia of the prostatic glands in this patient?

A) It indicates a high risk of prostate cancer.

B) It suggests the need for immediate surgical intervention.

C) It explains the patient’s lower urinary tract symptoms (LUTS).

D) It confirms acute prostatitis as the underlying cause.

E) It rules out any pathological condition.

Correct Answer: C

Rationale: Hyperplasia of the prostatic glands in BPH leads to compression of the urethra, causing lower urinary tract symptoms (LUTS) such as difficulty urinating and weak urine stream.

3.2. Scenario [[Histology of the lower urinary system]:

A 30-year-old female presents with recurrent urinary tract infections (UTIs). A cystoscopy is performed, and a biopsy of the bladder wall shows transitional epithelium with underlying lamina propria and detrusor muscle layers intact.

MCQ #1:

Which type of epithelium lines the urinary bladder and allows it to stretch during filling?

A) Simple squamous epithelium

B) Stratified squamous epithelium

C) Transitional epithelium

D) Pseudostratified columnar epithelium

E) Simple cuboidal epithelium

Correct Answer: C

Rationale: The urinary bladder is lined by transitional epithelium, which is specialized to accommodate stretching and distension during bladder filling and contraction.

MCQ #2:

What is the primary function of the detrusor muscle in the bladder wall?

A) Secretion of mucus to protect against infection

B) Contraction to expel urine during micturition

C) Absorption of solutes from urine

D) Production of renin to regulate blood pressure

E) Prevention of urine backflow into the ureters

Correct Answer: B

Rationale: The detrusor muscle, composed of smooth muscle fibers, contracts during micturition to expel urine from the bladder.

MCQ #3:

Why might recurrent UTIs occur despite normal histological findings of the bladder wall?

A) The transitional epithelium is inherently defective.

B) The lamina propria is too thin to prevent bacterial invasion.

C) Structural or functional abnormalities may predispose to infections.

D) The detrusor muscle prevents complete bladder emptying.

E) The urethral sphincter is overactive.

Correct Answer: C

Rationale: Recurrent UTIs can occur due to structural or functional abnormalities, such as vesicoureteral reflux or incomplete bladder emptying, even if the histology appears normal.

3.3. Scenario [[Histology of the lower urinary system]:

A 45-year-old male presents with hematuria and flank pain. Imaging reveals a mass in the bladder. A biopsy shows nests of malignant cells invading the muscularis propria.

MCQ #1:

Which histological layer must be invaded by tumor cells to diagnose muscle-invasive bladder cancer?

A) Urothelium

B) Lamina propria

C) Muscularis propria

D) Adventitia

E) Submucosa

Correct Answer: C

Rationale: Muscle-invasive bladder cancer is diagnosed when malignant cells invade the muscularis propria, indicating a more advanced stage of disease.

MCQ #2:

What is the most common histological type of bladder cancer?

A) Squamous cell carcinoma

B) Adenocarcinoma

C) Urothelial carcinoma

D) Small cell carcinoma

E) Sarcoma

Correct Answer: C

Rationale: Urothelial carcinoma, also known as transitional cell carcinoma, is the most common histological type of bladder cancer, arising from the urothelium lining the bladder.

MCQ #3:

Why is invasion of the muscularis propria clinically significant in bladder cancer?

A) It indicates a low risk of metastasis.

B) It suggests localized disease that can be managed conservatively.

C) It correlates with a higher risk of metastasis and worse prognosis.

D) It implies the tumor is confined to the mucosal layer.

E) It confirms the tumor is benign.

Correct Answer: C

Rationale: Invasion of the muscularis propria in bladder cancer correlates with a higher risk of metastasis and worse prognosis, necessitating aggressive treatment strategies.

# Qwen 3B

1.1. Scenario:

A 6-year-old presents with pedal edema and massive proteinuria. A kidney biopsy shows effacement of podocyte foot processes on electron microscopy with otherwise normal light microscopy.

MCQ #1:

What is the primary histological finding in this patient's renal corpuscle biopsy?

A) Thickened glomerular basement membrane

B) Proliferative glomerulonephritis

C) Effacement of podocyte foot processes

D) Mesangial matrix expansion

E) Endothelial hyperplasia

Correct Answer: C

Rationale: Effacement of podocyte foot processes is characteristic of minimal change disease, which presents with nephrotic syndrome and normal light microscopy.

MCQ #2:

Which clinical condition is most consistent with the biopsy findings?

A) Acute glomerulonephritis

B) Nephrotic syndrome

C) Acute interstitial nephritis

D) Acute tubular necrosis

E) Chronic kidney disease

Correct Answer: B

Rationale: Nephrotic syndrome is defined by heavy proteinuria, hypoalbuminemia, and edema, commonly caused by minimal change disease in children.

MCQ #3:

What structural component of the renal corpuscle is primarily responsible for the proteinuria in this patient?

A) Endothelial cells

B) Podocyte slit diaphragm

C) Mesangial cells

D) Basement membrane

E) Bowman's capsule

Correct Answer: B

Rationale: The podocyte slit diaphragm normally prevents protein leakage; its dysfunction due to foot process effacement leads to proteinuria in minimal change disease.

1.2. Scenario:

A 25-year-old patient presents with frothy urine and periorbital edema. Urinalysis reveals proteinuria (3+), and a renal biopsy shows enlarged glomeruli with thickened glomerular basement membranes (GBMs) and mesangial cell proliferation. Light microscopy demonstrates "spikled and domed" GBM profiles.

MCQ #1:

Which histological feature is most characteristic of the patient’s condition?

A) Effacement of podocyte foot processes

B) Mesangial matrix expansion

C) Thickened glomerular basement membrane with spikes

D) Crescent formation around glomeruli

E) Hyalinosis of afferent arterioles

Correct Answer: C

Rationale: The "spikled and domed" appearance of the GBM is classic for immune complex-mediated glomerulonephritis, such as in lupus nephritis or membranous nephropathy, where immune deposits cause GBM thickening

MCQ #2:

Which clinical condition is most likely associated with the biopsy findings?

A) Minimal change disease

B) Focal segmental glomerulosclerosis

C) Rapidly progressive glomerulonephritis

D) Membranous glomerulopathy

E) Acute interstitial nephritis

Correct Answer: D

Rationale: Membranous glomerulopathy (e.g., membranous nephropathy) is characterized by thickened GBMs with spikes due to subepithelial immune deposits, leading to proteinuria.

MCQ #3:

Which underlying process is directly responsible for the thickened glomerular basement membrane?

A) Podocyte apoptosis

B) Mesangial cell apoptosis

C) Subepithelial immune complex deposition

D) Endothelial cell proliferation

E) Basement membrane autoantibody production

Correct Answer: C

Rationale: Immune complexes deposited in the subepithelial space (between podocytes and GBM) trigger an inflammatory response, leading to GBM thickening and spike formation.

1.3. Scenario (about Histology of Renal corpuscle):

A 30-year-old patient presents with hematuria, hypertension, and periorbital edema. A renal biopsy reveals hypercellular glomeruli with swollen endothelial cells, increased mesangial matrix, and thickened glomerular basement membranes. Immunofluorescence shows granular deposition of IgG and C3 along the glomerular basement membrane.

MCQ #1:

Which histological finding is most directly responsible for the patient’s hematuria?

A) Hypercellular glomeruli

B) Thickened glomerular basement membrane

C) Parietal epithelial cell hyperplasia

D) Podocyte foot process effacement

E) Mesangial matrix expansion

Correct Answer: A) Hypercellular glomeruli

Rationale: Hypercellularity (endothelial and mesangial proliferation) disrupts the glomerular filtration barrier, leading to red blood cell leakage into the urine.

MCQ #2:

The immunofluorescence findings are most characteristic of which diagnosis?

A) Minimal change disease

B) Acute post-streptococcal glomerulonephritis

C) Diabetic nephropathy

D) Membranous nephropathy

E) IgA nephropathy

Correct Answer: D) Membranous nephropathy

Rationale: Granular IgG and C3 deposition along the glomerular basement membrane is classic for membranous nephropathy, which typically presents with nephrotic-range proteinuria and thickened basement membranes.

MCQ #3:

Which clinical finding is most associated with the thickened glomerular basement membrane observed in this case?

A) Hypertension

B) Hematuria

C) Proteinuria

D) Hyperkalemia

E) Polyuria

Correct Answer: C) Proteinuria

Rationale: Thickened basement membranes reduce the glomerular filtration barrier’s selectivity, allowing proteins (e.g., albumin) to leak into urine, leading to proteinuria.

2.1. Scenario: A 20-year-old patient presents with muscle cramps, hypokalemia, and metabolic alkalosis. Laboratory tests reveal hypomagnesemia and hypocalciuria. Renal biopsy shows atrophic cells in the distal convoluted tubule. Which ion transport defect is most likely responsible?

MCQ #1:

Which nephron segment is primarily affected in this patient's condition?

A) Proximal tubule

B) Loop of Henle

C) Distal convoluted tubule

D) Collecting duct

E) Glomerulus

Correct Answer: C

Rationale: Gitelman syndrome involves the distal convoluted tubule, where the thiazide-sensitive NaCl cotransporter (NCCT) is defective.

MCQ #2:

The defect in which ion transporter leads to the electrolyte abnormalities observed in this patient?

A) Sodium-glucose cotransporter 2 (SGLT2)

B) Sodium-potassium-2 chloride cotransporter (NKCC2)

C) Epithelial sodium channel (ENaC)

D) Thiazide-sensitive NaCl cotransporter (NCCT)

E) Calcium channel (TRPV5)

Correct Answer: D

Rationale: Gitelman syndrome is caused by mutations in the SLC12A3 gene encoding the thiazide-sensitive NaCl cotransporter (NCCT) in the distal convoluted tubule.

MCQ #3:

The hypokalemia in this patient is primarily due to:

A) Decreased intake

B) Increased renal excretion

C) Increased cellular uptake

D) Gastrointestinal losses

E) Hormonal deficiency

Correct Answer: B

Rationale: Defective NaCl reabsorption in the DCT leads to volume depletion, stimulating aldosterone secretion, which drives potassium excretion via principal cells in the collecting duct.

2.2. Scenario:

A 30-year-old patient presents with macroscopic hematuria and proteinuria following a viral upper respiratory infection. Renal biopsy shows mesangial proliferation and immunofluorescence reveals granular deposits of IgA in the mesangial regions.

MCQ #1:

Which histological feature is most characteristic of this patient's renal biopsy?

A) Podocyte foot process effacement

B) Thickened glomerular basement membrane with spike formation

C) Mesangial immune complex deposits

D) Crescent formation in Bowman's space

E) Hyaline thrombi in glomerular capillaries

Correct Answer: C

Rationale: IgA nephropathy is defined by mesangial IgA deposits, which are a hallmark of this condition.

MCQ #2:

What part of the nephron is primarily affected in this condition?

A) Proximal convoluted tubule

B) Glomerulus

C) Loop of Henle

D) Distal convoluted tubule

E) Collecting duct

Correct Answer: B

Rationale: The glomerulus, specifically the mesangial area, is the site of mesangial proliferation and IgA deposition.

MCQ #3:

What is the most likely pathophysiological mechanism leading to the observed mesangial deposits?

A) Immune complex deposition

B) Direct viral invasion of the glomerulus

C) Autoantibody-mediated glomerular damage

D) Podocyte injury from hypertensive nephrosclerosis

E) Tubular obstruction by calcium oxalate crystals

Correct Answer: A

Rationale: IgA nephropathy results from the deposition of IgA-containing immune complexes in the mesangium, triggering inflammation and damage.

2.3. Scenario (about Histology of the nephron):

A 25-year-old patient presents with frothy urine and edema. Urinalysis shows proteinuria (3+), hematuria (2–5 RBCs/hpf), and no casts. A kidney biopsy reveals effacement of podocyte foot processes and minimal mesangial changes.

MCQ #1:

Which histological structure is primarily responsible for the observed proteinuria in this patient?

A) Glomerular basement membrane

B) Podocyte foot processes

C) Proximal convoluted tubule brush border

D) Distal convoluted tubule cells

E) Collecting duct intercalated cells

Correct Answer: B

Rationale: Podocyte foot processes form the slit diaphragm, which filters proteins; their effacement disrupts the glomerular filtration barrier, leading to proteinuria.

MCQ #2:

The proximal convoluted tubule is characterized by which histological feature?

A) Dense irregular basement membrane

B) Apical microvilli forming a brush border

C) Intercalated cells with intracellular vesicles

D) Straight segment descending into medulla

E) Thin, fenestrated endothelium

Correct Answer: B

Rationale: The brush border of the proximal tubule is formed by microvilli, increasing surface area for reabsorption of filtered solutes like glucose and sodium.

MCQ #3:

The patient’s biopsy findings suggest damage to which component of the glomerular filtration barrier?

A) Endothelial cells

B) Podocytes

C) Mesangial cells

D) Basement membrane collagen IV

E) Juxtaglomerular apparatus

Correct Answer: B

Rationale: Podocyte foot process effacement impairs the charge-selective barrier, allowing proteins to leak into the urine, as seen in minimal change disease.

3.1. Scenario: A 32-year-old woman presents with dysuria, urgency, and suprapubic pain. Urinalysis shows pyuria. A bladder biopsy reveals neutrophilic infiltration in the lamina propria and edema of the transitional epithelium.

MCQ #1:

A) Neutrophilic infiltrate in the lamina propria

B) Squamous metaplasia of the transitional epithelium

C) Hyalinization of the muscularis externa

D) Nuclear atypia in urothelial cells

E) Fibrosis of the submucosa

Correct Answer: A

Rationale: Neutrophilic infiltration in the lamina propria is a hallmark of acute cystitis, reflecting the inflammatory response to infection.

MCQ #2:

A) Cuboidal cell shape

B) Presence of desmosomes

C) Cytoplasmic vesicles in superficial cells

D) Elongated nuclei

E) Tight junctions between cells

Correct Answer: C

Rationale: The superficial cells of transitional epithelium contain large cytoplasmic vesicles that allow them to flatten and stretch as the bladder fills.

MCQ #3:

A) Neutrophilic infiltrate in the lamina propria

B) Edema of the transitional epithelium

C) Fibrosis of the lamina propria

D) Nuclear atypia in urothelial cells

E) Increased mitotic activity

Correct Answer: C

Rationale: Chronic cystitis typically involves fibrosis and collagen deposition in the lamina propria, while acute cystitis is characterized by neutrophilic inflammation.

3.2. Scenario:

A 28-year-old woman presents with dysuria, urgency, and frequency. Urinalysis shows pyuria. A bladder biopsy reveals neutrophilic infiltration in the lamina propria, while the urothelium appears intact. What is the most likely diagnosis?

MCQ #1:

Which histological finding is most characteristic of the patient's condition?

A) Squamous metaplasia of the urothelium

B) Neutrophilic infiltration in the lamina propria

C) Urothelial dysplasia

D) Fibrosis of the detrusor muscle

E) Mast cell infiltration

Correct Answer: B

Rationale: Acute cystitis is marked by neutrophilic infiltration in the lamina propria, with an intact urothelium.

MCQ #2:

Which bladder layer is primarily responsible for its distensibility during urine storage?

A) Muscularis externa

B) Lamina propria

C) Urothelium

D) Submucosa

E) Adventitia

Correct Answer: C

Rationale: The transitional (urothelial) epithelium allows the bladder to stretch and return to its original shape due to its unique histological structure.

MCQ #3:

Chronic inflammation of the bladder mucosa may lead to which histological change?

A) Neutrophilic infiltration

B) Squamous metaplasia

C) Urothelial hyperplasia

D) Mast cell hyperplasia

E) Detrusor muscle hypertrophy

Correct Answer: B

Rationale: Chronic inflammation often induces squamous metaplasia as a reactive change in the urothelium to protect against further irritation.

3.3. Scenario: A 62-year-old male presents with painless hematuria. Cystoscopy reveals a papillary lesion in the bladder trigone. Histological examination of the biopsy shows atypical cells with hyperchromatic nuclei and loss of polarity in the transitional epithelium. The underlying stroma exhibits fibromuscular stromal invasion.

MCQ #1:

Which histological feature is most characteristic of this bladder lesion?

A) Squamous metaplasia of the urothelium

B) Papillary architecture with branching fronds

C) Glandular structures in the lamina propria

D) Intranuclear inclusions in the transitional epithelium

E) Granulomatous inflammation of the muscularis externa

Correct Answer: B

Rationale: Papillary projections with branching fronds are a hallmark of urothelial carcinoma, which originates from the transitional epithelium.

MCQ #2:

The lesion primarily arises from which histological layer of the bladder wall?

A) Muscularis externa

B) Transitional epithelium (urothelium)

C) Lamina propria

D) Serosa

E) Submucosa

Correct Answer: B

Rationale: Urothelial carcinoma originates from the transitional epithelium, the bladder’s surface lining.

MCQ #3:

Which finding on histology distinguishes this lesion from chronic cystitis?

A) Chronic inflammation in the lamina propria

B) Nuclear atypia and loss of cell polarity

C) Edema in the submucosa

D) Mitotic figures in smooth muscle cells

E) Hyaline droplet accumulation

Correct Answer: B

Rationale: Nuclear atypia and loss of cell polarity indicate malignancy, whereas chronic cystitis shows inflammation without such cytological changes.

# Grok-3

1.1. Scenario (about Renal Corpuscle):

A 25-year-old male presents with blood in his urine (hematuria) and mild swelling in his legs. His blood pressure is elevated at 150/95 mmHg. A urine test reveals proteinuria, and a kidney biopsy shows thinning and splitting of the glomerular basement membrane in the renal corpuscle. The podocytes appear intact, but the filtration slits are narrowed. This suggests a condition affecting the glomerular filtration barrier, critical for filtering blood into Bowman’s space. The renal corpuscle, consisting of the glomerulus and Bowman’s capsule, is histologically key here, as its delicate structures (capillaries, podocytes, and basement membrane) are compromised, leading to leakage of proteins and red blood cells into the urine.

MCQ #1:

What is the primary histological component of the renal corpuscle affected in this patient’s condition?
A) Proximal convoluted tubule
B) Glomerular basement membrane
C) Loop of Henle
D) Collecting duct
E) Distal convoluted tubule
**Correct Answer: B**
**Rationale:** The glomerular basement membrane is a key part of the filtration barrier in the renal corpuscle, and its thinning and splitting allow blood and proteins to leak into the urine, as described in the scenario.

MCQ #2:

Which structure in the renal corpuscle directly surrounds the glomerular capillaries and helps form the filtration slits?
A) Bowman’s capsule parietal layer
B) Mesangial cells
C) Podocytes
D) Endothelial cells
E) Juxtaglomerular cells
**Correct Answer: C**
**Rationale:** Podocytes wrap around the glomerular capillaries with their foot processes, forming filtration slits that regulate what passes into Bowman’s space; their narrowing is noted in the scenario.

MCQ #3:

The patient’s hematuria and proteinuria most likely result from dysfunction in which clinical function of the renal corpuscle?
A) Reabsorption of glucose
B) Secretion of potassium
C) Filtration of plasma
D) Concentration of urine
E) Production of erythropoietin
**Correct Answer: C**
**Rationale:** The renal corpuscle filters plasma to form urine; damage to its filtration barrier, as seen here, allows red blood cells and proteins to escape into the filtrate, causing hematuria and proteinuria.

1.2. Scenario (Renal Corpuscle):

A 25-year-old male presents with blood in his urine (hematuria) and mild swelling in his legs after a recent streptococcal throat infection. On examination, his blood pressure is elevated at 150/95 mmHg. A kidney biopsy reveals damage to the renal corpuscle, specifically the glomerulus, with thickened basement membranes and increased cellularity. The podocytes appear flattened, and the filtration slits are narrowed. These changes suggest post-streptococcal glomerulonephritis, a condition where immune complexes deposit in the glomerular filtration barrier, impairing its function. This leads to leakage of red blood cells into the urine and reduced filtration efficiency, causing fluid retention and hypertension.

MCQ #1

Which structure of the renal corpuscle is primarily responsible for filtering plasma into the Bowman’s space?
A) Podocytes
B) Fenestrated capillaries
C) Bowman’s capsule
D) Mesangial cells
E) Proximal tubule epithelium

**Correct Answer:** B
**Rationale:** Fenestrated capillaries in the glomerulus allow plasma to pass through their pores, forming the initial filtrate in Bowman’s space, while podocytes and the basement membrane refine the filtration process.

MCQ #2:

In the patient’s condition, the thickened glomerular basement membrane most likely results from:
A) Increased filtration of large proteins
B) Deposition of immune complexes
C) Loss of fenestrations in capillary endothelium
D) Overproduction of collagen by podocytes
E) Hypertrophy of mesangial cells

**Correct Answer:** B
**Rationale:** Post-streptococcal glomerulonephritis involves immune complex deposition in the glomerular basement membrane, leading to inflammation and thickening, which impairs filtration.

MCQ #3:

The narrowing of filtration slits between podocytes in this scenario would most directly cause:
A) Increased filtration of red blood cells
B) Decreased reabsorption of glucose
C) Retention of large plasma proteins in blood
D) Reduced urine output due to tubular damage
E) Increased sodium excretion

**Correct Answer:** A
**Rationale:** Narrowed filtration slits disrupt the filtration barrier, allowing red blood cells to leak into the urine (hematuria), a hallmark of glomerular damage in this condition.

1.3. Scenario (Renal Corpuscle):

A 25-year-old male presents with hematuria and proteinuria after a recent upper respiratory infection. His blood pressure is elevated at 150/90 mmHg, and a urine dipstick shows 3+ protein. A renal biopsy reveals thickening of the glomerular basement membrane and immune complex deposition in the renal corpuscle, specifically affecting the filtration barrier. The patient is diagnosed with post-streptococcal glomerulonephritis, a condition linked to damage in the renal corpuscle—the structure comprising the glomerulus and Bowman's capsule. Histologically, the glomerulus contains capillary loops lined by endothelial cells, supported by podocytes with foot processes, and separated by a basement membrane. This scenario highlights how inflammation disrupts the filtration function, leading to leakage of blood and proteins into the urine.

MCQ #1:

Which histological component of the renal corpuscle is primarily responsible for filtering plasma into Bowman’s space?
A) Endothelial cells of the glomerular capillaries
B) Mesangial cells
C) Parietal epithelial cells of Bowman’s capsule
D) Juxtaglomerular cells
E) Proximal tubule cells

**Correct Answer:** A
**Rationale:** Endothelial cells of the glomerular capillaries, along with the basement membrane and podocytes, form the filtration barrier, allowing plasma to pass into Bowman’s space while retaining larger molecules like proteins.

MCQ #2:

In this patient, proteinuria suggests damage to which specific structure of the renal corpuscle?
A) Bowman’s capsule parietal layer
B) Podocyte foot processes
C) Mesangial matrix
D) Afferent arteriole
E) Efferent arteriole

**Correct Answer:** B
**Rationale:** Podocyte foot processes are critical to the filtration barrier; their damage, as seen in glomerulonephritis, allows proteins to leak into the urine, causing proteinuria.

MCQ #3:

What clinical finding in this patient most directly reflects impaired renal corpuscle function?
A) Elevated blood pressure
B) Hematuria
C) Fever from infection
D) Increased serum creatinine
E) Decreased urine output

**Correct Answer:** B
**Rationale:** Hematuria indicates red blood cells leaking through a damaged glomerular filtration barrier, a direct sign of renal corpuscle dysfunction, whereas other options may reflect broader kidney or systemic issues.

2.1. Scenario (Histology of the nephron):

A 45-year-old male presents with fatigue, swelling in his legs, and foamy urine. Labs reveal significant proteinuria and hypoalbuminemia, suggesting nephrotic syndrome. A renal biopsy is performed, and the histologist observes the nephron under a microscope. The glomerulus shows thickened basement membranes and effacement of podocyte foot processes, while the proximal convoluted tubule appears relatively normal with its prominent brush border. The loop of Henle and distal convoluted tubule show no obvious abnormalities. This case highlights how histological changes in the nephron, particularly in the glomerulus, can lead to clinical symptoms by disrupting filtration and protein reabsorption.

MCQ #1:

Which histological feature of the nephron is most responsible for the proteinuria observed in this patient?
A) Thickened glomerular basement membrane
B) Brush border of the proximal tubule
C) Thin limb of the loop of Henle
D) Cuboidal epithelium of the distal tubule
E) Collecting duct’s principal cells

**Correct Answer:** A
**Rationale:** The thickened glomerular basement membrane, along with podocyte effacement, impairs the filtration barrier, allowing proteins to leak into the urine, causing proteinuria. Other structures listed are not directly involved in this process.

MCQ #2:

In the proximal convoluted tubule, which histological feature is most critical for reabsorbing filtered glucose and amino acids?
A) Thin squamous epithelium
B) Microvilli forming a brush border
C) Fenestrated capillaries
D) Podocyte foot processes
E) Intercalated cells

**Correct Answer:** B
**Rationale:** The microvilli of the brush border increase the surface area for reabsorption of glucose and amino acids in the proximal tubule. Other options are either absent or unrelated to this function.

MCQ #3:

What histological change in the glomerulus likely contributes to the patient’s hypoalbuminemia?
A) Increased fenestrations in endothelial cells
B) Effacement of podocyte foot processes
C) Hyperplasia of mesangial cells
D) Atrophy of the Bowman’s capsule
E) Thickening of the afferent arteriole

**Correct Answer:** B
**Rationale:** Effacement of podocyte foot processes disrupts the filtration barrier, allowing albumin to escape into the urine, leading to hypoalbuminemia. The other options do not directly cause protein loss.

2.2. Scenario (Histology of the Nephron):

A 25-year-old male presents to the clinic with complaints of swelling in his legs and dark urine for two weeks. He reports a sore throat three weeks prior. On examination, his blood pressure is elevated, and urinalysis reveals hematuria and proteinuria. The physician suspects acute post-streptococcal glomerulonephritis, a condition affecting the nephron’s glomerular structure. A renal biopsy is performed, and the histologist observes thickening of the glomerular basement membrane and increased cellularity in the Bowman’s capsule due to inflammation. These changes impair the filtration process, leading to the patient’s symptoms. This case highlights the importance of understanding the nephron’s histological features, particularly the glomerulus, in diagnosing and managing kidney-related diseases.

MCQ #1:

Which histological structure of the nephron is primarily affected in acute post-streptococcal glomerulonephritis?
A) Proximal convoluted tubule
B) Loop of Henle
C) Glomerulus
D) Distal convoluted tubule
E) Collecting duct
**Correct Answer: C**
**Rationale:** The glomerulus is the primary site of inflammation and damage in post-streptococcal glomerulonephritis, leading to impaired filtration and symptoms like hematuria and proteinuria.

MCQ #2:

In the biopsy of this patient, thickening of which structure is most likely observed?
A) Podocyte cytoplasm
B) Glomerular basement membrane
C) Brush border of proximal tubule
D) Thin limb of Loop of Henle
E) Collecting duct epithelium
**Correct Answer: B**
**Rationale:** Thickening of the glomerular basement membrane occurs due to immune complex deposition in glomerulonephritis, disrupting filtration and causing clinical symptoms.

MCQ #3:

What is the primary function of the nephron structure affected in this patient’s condition?
A) Reabsorption of glucose and amino acids
B) Concentration of urine
C) Filtration of plasma to form urine
D) Secretion of potassium
E) Regulation of acid-base balance
**Correct Answer: C**
**Rationale:** The glomerulus filters plasma to form the initial urine filtrate, and its dysfunction in glomerulonephritis leads to blood and protein leakage into the urine.

2.3. Scenario (Histology of the Nephron):

A 25-year-old male presents with persistent flank pain, hematuria, and elevated blood pressure. A renal biopsy is performed, and histological examination reveals damage to the glomerulus, specifically the podocytes and filtration slits, with evidence of protein leakage into Bowman’s space. The proximal convoluted tubule shows signs of reabsorption dysfunction, while the loop of Henle appears intact. The patient’s symptoms suggest a glomerular disorder, likely minimal change disease, which is common in young adults and affects the nephron’s filtration barrier. Understanding the histology of the nephron—glomerular filtration, tubular reabsorption, and concentration mechanisms—is key to linking these findings to his clinical presentation.

MCQ #1:

Which histological feature of the nephron is primarily responsible for filtering blood plasma?
A) Proximal convoluted tubule
B) Loop of Henle
C) Distal convoluted tubule
D) Glomerulus
E) Collecting duct
**Correct Answer: D**
**Rationale:** The glomerulus, with its fenestrated capillaries and podocyte filtration slits, is the primary site of blood plasma filtration, forming the filtrate that enters Bowman’s space.

MCQ #2:

In this patient, protein leakage into the urine is most likely due to damage to which nephron structure?
A) Brush border of the proximal tubule
B) Thin descending limb of the loop of Henle
C) Podocytes of the glomerulus
D) Principal cells of the collecting duct
E) Macula densa of the distal tubule
**Correct Answer: C**
**Rationale:** Podocytes form the filtration slits in the glomerulus, and their damage disrupts the filtration barrier, allowing proteins to leak into the urine.

MCQ #3:

Which nephron segment is most responsible for reabsorbing the majority of filtered glucose and amino acids?
A) Glomerulus
B) Proximal convoluted tubule
C) Loop of Henle
D) Distal convoluted tubule
E) Collecting duct
**Correct Answer: B**
**Rationale:** The proximal convoluted tubule, with its extensive brush border microvilli, reabsorbs most filtered glucose, amino acids, and ions from the filtrate back into the bloodstream.

3.1. Scenario (Histology of the Lower Urinary System):

A 24-year-old male presents to the emergency department with severe flank pain, dysuria, and hematuria. He reports a history of dehydration after a long hiking trip. A urine analysis reveals the presence of calcium oxalate crystals, suggesting a diagnosis of a urinary stone. Imaging confirms a stone lodged in the ureter. The urologist explains that the ureter’s histological structure, particularly its transitional epithelium and muscular layers, allows it to stretch and contract to move urine, but irritation from the stone has caused inflammation and bleeding. This case highlights the importance of the lower urinary system’s histology in understanding obstruction-related pathology.

MCQ #1:

Which histological feature of the ureter allows it to adapt to varying urine volumes and facilitate peristalsis?
A) Simple squamous epithelium
B) Stratified cuboidal epithelium
C) Transitional epithelium
D) Smooth muscle arranged in a single layer
E) Dense irregular connective tissue

**Correct Answer:** C
**Rationale:** The ureter is lined by transitional epithelium, which can stretch and recoil to accommodate urine flow, while underlying smooth muscle layers enable peristalsis to propel urine toward the bladder.

MCQ #2:

In this patient, inflammation caused by the stone rubbing against the ureter wall is most likely to affect which layer initially?
A) Adventitia
B) Muscularis
C) Mucosa
D) Serosa
E) Submucosa

**Correct Answer:** C
**Rationale:** The mucosa, which includes the transitional epithelium, is the innermost layer of the ureter and would be the first to experience irritation and inflammation from the stone’s mechanical damage.

MCQ #3:

If the stone causes chronic irritation, which pathological change might be observed in the ureter’s transitional epithelium over time?
A) Metaplasia to stratified squamous epithelium
B) Increased goblet cell production
C) Atrophy of the epithelial layer
D) Hyperplasia of smooth muscle cells
E) Fibrosis of the adventitia

**Correct Answer:** A
**Rationale:** Chronic irritation of transitional epithelium can lead to metaplasia, where it transforms into stratified squamous epithelium as an adaptive response to persistent injury.

3.2. Scenario (Histology of the Lower Urinary System):

A 45-year-old male presents to the clinic with complaints of frequent urination and a burning sensation during urination for the past week. He denies fever or flank pain. A urinalysis reveals the presence of bacteria and white blood cells, suggesting a urinary tract infection (UTI). The physician explains that the infection likely involves the urethra and bladder, where the histological features—such as the transitional epithelium lining these structures—play a role in both protection and pathology. In the bladder, this epithelium stretches to accommodate urine volume, but its superficial cells can be breached by pathogens, leading to inflammation. The patient is prescribed antibiotics, and the physician emphasizes the importance of the lower urinary system’s histological structure in understanding the condition.

MCQ #1:

Which histological feature of the bladder’s mucosa allows it to stretch and accommodate varying urine volumes?
A) Stratified squamous epithelium
B) Simple columnar epithelium
C) Transitional epithelium
D) Pseudostratified epithelium
E) Simple squamous epithelium
**Correct Answer: C**
**Rationale:** Transitional epithelium is unique to the urinary system and allows the bladder to expand and contract while maintaining a protective barrier against urine.

MCQ #2:

In this patient’s UTI, bacteria likely penetrated the superficial cells of the bladder’s transitional epithelium. What is the primary function of these superficial "umbrella" cells under normal conditions?
A) Secretion of mucus
B) Absorption of water
C) Formation of a protective barrier
D) Active transport of sodium ions
E) Production of urine
**Correct Answer: C**
**Rationale:** The umbrella cells of transitional epithelium form a tight, impermeable barrier that protects underlying tissues from the toxic effects of urine.

MCQ #3:

If the infection spreads to the urethra, which epithelial type is most likely involved in the male patient’s case?
A) Stratified squamous epithelium
B) Simple cuboidal epithelium
C) Transitional epithelium
D) Stratified columnar epithelium
E) Simple squamous epithelium
**Correct Answer: A**
**Rationale:** The male urethra, particularly near the external opening, is lined with stratified squamous epithelium, which provides protection against pathogens and mechanical stress.

3.3. Scenario (about Histology of the Lower Urinary System):

A 22-year-old male presents to the clinic with dysuria and frequent urination for three days. He reports a burning sensation during urination but no fever. A urinalysis reveals numerous white blood cells and bacteria, suggesting a urinary tract infection (UTI). The infection is localized to the bladder, where the transitional epithelium (urothelium) lining the lower urinary system is inflamed. This epithelium, unique to the urinary tract, is designed to stretch and protect against urine’s osmotic and toxic effects. In this case, the inflammation disrupts the urothelium’s protective glycosaminoglycan layer, allowing bacterial adhesion and worsening symptoms. Understanding the histology of the bladder wall, including its mucosal lining and muscular detrusor layer, is key to recognizing the pathology and its clinical implications.

MCQ #1:

Which histological feature of the bladder’s urothelium is most critical for its protective function against urine?
A) Presence of dense collagen fibers
B) Ability to transition between cuboidal and squamous shapes
C) High concentration of smooth muscle cells
D) Thick layer of keratinized epithelium
E) Abundant goblet cells secreting mucus

**Correct Answer:** B
**Rationale:** The urothelium’s transitional nature allows it to stretch and flatten, maintaining a barrier against urine’s harmful components, which is essential for its protective role. Other options like keratinization or goblet cells are not features of the urothelium.

MCQ #2:

In this patient’s UTI, what is the most likely histological change in the bladder mucosa?
A) Hyperplasia of smooth muscle fibers
B) Infiltration of inflammatory cells into the urothelium
C) Thickening of the basement membrane
D) Increased keratin production
E) Formation of glandular structures

**Correct Answer:** B
**Rationale:** A UTI typically causes inflammation, leading to infiltration of white blood cells into the urothelium as part of the immune response. Smooth muscle hyperplasia or keratin production are not typical responses to infection.

MCQ #3:

Which layer of the bladder wall is responsible for its ability to contract and expel urine?
A) Urothelium
B) Lamina propria
C) Detrusor muscle
D) Adventitia
E) Submucosa

**Correct Answer:** C
**Rationale:** The detrusor muscle, composed of smooth muscle, contracts to facilitate bladder emptying during urination. The urothelium and other layers primarily serve protective or supportive roles, not contraction.

# Grok-3-Think

1.1. Scenario (Renal Corpuscle)

A 25-year-old male presents with hematuria and proteinuria following a recent streptococcal throat infection. He reports dark-colored urine and mild swelling in his legs. A renal biopsy is performed, revealing changes in the renal corpuscle. This scenario illustrates post-streptococcal glomerulonephritis, a condition affecting the glomerulus—the capillary network within the renal corpuscle responsible for blood filtration. The inflammation disrupts the filtration barrier, leading to leakage of red blood cells and proteins into the urine. This case highlights the renal corpuscle’s key structures, including the glomerulus and Bowman’s capsule, and its clinical relevance in filtration-related pathology.

MCQ #1

**Question:** The presence of hematuria and proteinuria in this patient suggests dysfunction in which part of the nephron?
A) Proximal convoluted tubule
B) Loop of Henle
C) Distal convoluted tubule
D) Collecting duct
E) Glomerulus

**Correct Answer:** E
**Rationale:** The glomerulus filters blood, and its damage in glomerulonephritis allows red blood cells and proteins to leak into the urine, causing hematuria and proteinuria.

MCQ #2

**Question:** Which of the following correctly describes the components of the glomerular filtration barrier?
A) Endothelial cells, basement membrane, and podocytes
B) Mesangial cells, basement membrane, and endothelial cells
C) Podocytes, basement membrane, and parietal epithelial cells
D) Endothelial cells, mesangial cells, and podocytes
E) Basement membrane, podocytes, and juxtaglomerular cells

**Correct Answer:** A
**Rationale:** The glomerular filtration barrier consists of fenestrated endothelial cells, the glomerular basement membrane, and podocytes with slit diaphragms, ensuring selective filtration.

MCQ #3

**Question:** In the renal biopsy of this patient, which histological feature is most likely to be observed in the renal corpuscle?
A) Normal glomerular histology
B) Atrophy of the renal tubules
C) Inflammation of the glomeruli
D) Dilation of the collecting ducts
E) Fibrosis of the renal interstitium

**Correct Answer:** C
**Rationale:** Post-streptococcal glomerulonephritis causes inflammation of the glomeruli due to immune complex deposition, a hallmark histological finding in this condition.

**1.2. Scenario (Histology of Renal Corpuscle):**

In a histology laboratory session, first-year medical students examine a kidney section under a light microscope, focusing on the renal corpuscle, the initial filtering unit of the nephron. The instructor points out the glomerulus, a network of capillaries lined by fenestrated endothelial cells, and the surrounding Bowman's capsule. The visceral layer of the capsule consists of podocytes with foot processes, while the parietal layer is simple squamous epithelium. Students also note mesangial cells within the glomerulus. The instructor emphasizes the filtration barrier—fenestrated endothelium, glomerular basement membrane, and podocyte slit diaphragms—which selectively filters blood. Understanding these structures is key to recognizing how damage, such as in early kidney disease, can impair filtration.

MCQ #1:

**Which of the following is NOT a component of the glomerular filtration barrier?**
A) Fenestrated endothelium of glomerular capillaries
B) Glomerular basement membrane
C) Podocyte foot processes
D) Mesangial cells
E) Slit diaphragms between podocyte foot processes

**Correct Answer: D**
**Rationale:** The glomerular filtration barrier includes the fenestrated endothelium, glomerular basement membrane, and slit diaphragms between podocyte foot processes, but mesangial cells provide structural support within the glomerulus and are not part of the barrier.

MCQ #2:

**The filtration slits between podocyte foot processes are bridged by:**
A) Tight junctions
B) Gap junctions
C) Desmosomes
D) Slit diaphragms
E) Adherens junctions

**Correct Answer: D**
**Rationale:** Slit diaphragms are specialized structures that bridge the filtration slits between podocyte foot processes, regulating the passage of substances during blood filtration.

MCQ #3:

**The visceral layer of Bowman's capsule is composed of which type of cells?**
A) Simple squamous epithelial cells
B) Cuboidal epithelial cells
C) Podocytes
D) Mesangial cells
E) Endothelial cells

**Correct Answer: C**
**Rationale:** The visceral layer of Bowman's capsule consists of podocytes, specialized cells with foot processes that form part of the filtration barrier, unlike the simple squamous epithelium of the parietal layer.

**1.3. Scenario (about Histology of Renal Corpuscle):**

A child develops acute glomerulonephritis following a streptococcal infection. Histological examination of the kidney reveals inflammatory changes in the renal corpuscle, specifically in the glomerulus. The renal corpuscle normally consists of a glomerulus—a network of capillaries—and Bowman's capsule, which surrounds it. In this case, the glomerulus shows increased cellularity due to inflammation, affecting the filtration process. This condition highlights the importance of the renal corpuscle's histological features in kidney function and disease.

MCQ #1:

In the normal renal corpuscle, which cell type is responsible for forming the visceral layer of Bowman's capsule?
A) Endothelial cells
B) Mesangial cells
C) Podocytes
D) Parietal epithelial cells
E) Juxtaglomerular cells

**Correct Answer:** C) Podocytes
**Rationale:** Podocytes are specialized epithelial cells that form the visceral layer of Bowman's capsule and wrap around the glomerular capillaries, contributing to the filtration barrier.

MCQ #2:

In acute post-streptococcal glomerulonephritis, which of the following histological changes is typically observed in the glomerulus?
A) Atrophy of podocytes
B) Hyalinization of afferent arterioles
C) Hypercellularity due to infiltration of inflammatory cells
D) Thinning of the glomerular basement membrane
E) Dilatation of Bowman's space

**Correct Answer:** C) Hypercellularity due to infiltration of inflammatory cells
**Rationale:** Acute post-streptococcal glomerulonephritis causes an inflammatory response in the glomerulus, leading to increased cellularity from leukocyte infiltration and proliferation of intrinsic cells.

MCQ #3:

Which of the following cells in the renal corpuscle are involved in the regulation of blood pressure through the renin-angiotensin system?
A) Podocytes
B) Mesangial cells
C) Endothelial cells
D) Juxtaglomerular cells
E) Parietal epithelial cells

**Correct Answer:** D) Juxtaglomerular cells
**Rationale:** Juxtaglomerular cells, located near the glomerulus, secrete renin to regulate blood pressure via the renin-angiotensin-aldosterone system when blood pressure or sodium levels drop.

**2.1. Scenario (about [Histology of the nephron]):**

A 55-year-old female with a history of long-standing hypertension presents with proteinuria and reduced kidney function. A renal biopsy is performed, and histological examination reveals focal segmental glomerulosclerosis (FSGS) with areas of scarring in some glomeruli and normal-looking glomeruli in other areas. There is also evidence of podocyte injury and interstitial fibrosis.

**MCQ #1:**
Which structure of the nephron is primarily affected in focal segmental glomerulosclerosis (FSGS)?
A) Proximal convoluted tubule
B) Loop of Henle
C) Distal convoluted tubule
D) Glomerulus
E) Collecting duct
**Correct Answer:** D
**Rationale:** FSGS is a glomerular disease characterized by scarring in specific segments of some glomeruli, leading to proteinuria and reduced kidney function.

**MCQ #2:**
In this scenario, which histological feature is most likely to be observed in the affected glomeruli?
A) Neutrophilic infiltration
B) Segmental scarring
C) Tubular necrosis
D) Thickening of the basement membrane
E) Hyaline casts in the tubules
**Correct Answer:** B
**Rationale:** FSGS is defined by focal (some glomeruli) and segmental (part of the glomerulus) scarring, which is a hallmark histological finding in this condition.

**MCQ #3:**
Which of the following is a likely clinical consequence of the podocyte injury observed in this patient’s biopsy?
A) Hematuria
B) Proteinuria
C) Glycosuria
D) Polyuria
E) Oliguria
**Correct Answer:** B
**Rationale:** Podocyte injury disrupts the filtration barrier, allowing proteins to leak into the urine, resulting in proteinuria, a key feature of FSGS.

**2.2. Scenario (about Histology of the nephron):**

A 60-year-old female presents with acute kidney injury after prolonged use of high-dose NSAIDs for chronic pain. Laboratory tests show elevated serum creatinine and blood urea nitrogen. A renal biopsy is performed, and the pathologist observes necrosis of epithelial cells in specific segments of the nephron. The clinical presentation and biopsy findings suggest damage related to NSAID toxicity.

MCQ #1:
Based on the clinical history of NSAID use and the biopsy findings of epithelial cell necrosis, which part of the nephron is most likely affected?
A) Glomerulus
B) Proximal convoluted tubule
C) Loop of Henle
D) Distal convoluted tubule
E) Collecting duct

Correct Answer: B) Proximal convoluted tubule
Rationale: NSAIDs can cause acute tubular necrosis, often affecting the proximal convoluted tubule due to its role in reabsorbing and concentrating drugs and toxins, making it susceptible to injury.

MCQ #2:
In the renal biopsy, the affected tubular segment is lined by cuboidal epithelial cells with a prominent brush border and numerous mitochondria. Which segment of the nephron does this describe?
A) Proximal convoluted tubule
B) Descending limb of the loop of Henle
C) Ascending limb of the loop of Henle
D) Distal convoluted tubule
E) Collecting duct

Correct Answer: A) Proximal convoluted tubule
Rationale: The proximal convoluted tubule is characterized by cuboidal epithelial cells with a brush border (microvilli) and abundant mitochondria, which support its high reabsorptive capacity.

MCQ #3:
Which of the following structures is NOT part of the glomerular filtration barrier?
A) Fenestrated endothelium
B) Glomerular basement membrane
C) Podocytes
D) Mesangial cells
E) Filtration slits

Correct Answer: D) Mesangial cells
Rationale: The glomerular filtration barrier consists of the fenestrated endothelium, glomerular basement membrane, and podocytes with filtration slits. Mesangial cells provide structural support within the glomerulus but are not part of the filtration barrier.

**2.3. Scenario (about Histology of the nephron):**

A 55-year-old woman with a history of uncontrolled hypertension presents to the clinic with complaints of headache, blurred vision, and blood in her urine. Laboratory tests show proteinuria and elevated serum creatinine, suggesting kidney damage. A renal biopsy reveals hyaline arteriolosclerosis in the afferent arterioles and focal segmental glomerulosclerosis. These findings are consistent with hypertensive nephropathy, a condition linked to chronic high blood pressure affecting nephron structures.

MCQ #1:

In the nephron, which structure is directly affected by hyaline arteriolosclerosis in hypertensive nephropathy?
A) Glomerulus
B) Proximal convoluted tubule
C) Loop of Henle
D) Afferent arteriole
E) Collecting duct
**Correct Answer:** D
**Rationale:** Hyaline arteriolosclerosis involves the deposition of hyaline material in the walls of small arteries, such as the afferent arteriole, reducing blood flow to the glomerulus and contributing to renal damage in hypertensive nephropathy.

MCQ #2:

What is the primary histological feature of the glomerulus that allows it to filter blood?
A) Simple cuboidal epithelium with microvilli
B) Fenestrated capillaries
C) Thick squamous epithelium
D) Transitional epithelium
E) Dense collagen fibers
**Correct Answer:** B
**Rationale:** The glomerulus contains fenestrated capillaries, which have pores that allow the passage of water and small solutes into Bowman’s capsule while retaining larger proteins and cells, enabling blood filtration.

MCQ #3:

In hypertensive nephropathy, what does focal segmental glomerulosclerosis indicate about the glomerulus?
A) Increased filtration capacity
B) Scarring and loss of functional filtration areas
C) Enhanced reabsorption of sodium
D) Dilation of the glomerular capillaries
E) Regeneration of podocytes
**Correct Answer:** B
**Rationale:** Focal segmental glomerulosclerosis refers to scarring in parts of some glomeruli, reducing the filtration surface area and impairing kidney function, a common consequence of chronic hypertension.

**3.1. Scenario:**
A 30-year-old male presents to the clinic with complaints of frequent urination and a burning sensation during urination. He has no fever or flank pain. Urinalysis reveals pyuria and bacteriuria, and the physician suspects urethritis. The patient’s symptoms prompt a discussion about the histological features of the urethra and its susceptibility to infections.

**MCQ #1:**
Which type of epithelium is primarily found in the proximal urethra of males?
A) Simple squamous epithelium
B) Stratified squamous epithelium
C) Transitional epithelium
D) Pseudostratified columnar epithelium
E) Simple cuboidal epithelium
**Correct Answer:** C
**Rationale:** The proximal urethra in males, near the bladder (prostatic urethra), is lined with transitional epithelium, which is continuous with the bladder lining and accommodates urine flow.

**MCQ #2:**
In this patient with urethritis, which histological feature of the urethra is most likely to be infiltrated by inflammatory cells?
A) Muscularis layer
B) Submucosa
C) Transitional epithelium
D) Adventitia
E) Serosa
**Correct Answer:** B
**Rationale:** In urethritis, inflammation typically involves the submucosa, where inflammatory cells such as neutrophils infiltrate due to infection, as it lies beneath the epithelial lining.

**MCQ #3:**
The distal urethra in males is lined with which type of epithelium, making it more resistant to mechanical stress and pathogens?
A) Transitional epithelium
B) Stratified squamous epithelium
C) Pseudostratified columnar epithelium
D) Simple columnar epithelium
E) Stratified cuboidal epithelium
**Correct Answer:** B
**Rationale:** The distal urethra (penile urethra) in males is lined with stratified squamous epithelium, which provides protection against mechanical stress and pathogens due to its multiple layers.

**3.2. Scenario (Histology of the Lower Urinary System):**

A 65-year-old male presents with painless hematuria. He has a history of smoking. Cystoscopy reveals a papillary lesion in the bladder, and a biopsy is taken. Histological examination shows abnormal cells with increased nuclear-to-cytoplasmic ratio and loss of polarity, extending from the basement membrane to the surface.

MCQ #1:
What is a characteristic feature of normal transitional epithelium?
A) It consists of a single layer of cells.
B) It has a surface layer of umbrella cells.
C) It contains numerous goblet cells.
D) It is keratinized.
E) It is ciliated.

Correct Answer: B) It has a surface layer of umbrella cells.
Rationale: Transitional epithelium is characterized by its ability to stretch, and the surface layer consists of large, dome-shaped umbrella cells that protect underlying cells from urine.

MCQ #2:
The biopsy shows abnormal cells with increased nuclear-to-cytoplasmic ratio. What does this finding suggest?
A) Benign hyperplasia
B) Inflammation
C) Malignancy
D) Metaplasia
E) Normal variation

Correct Answer: C) Malignancy
Rationale: An increased nuclear-to-cytoplasmic ratio is a common feature of malignant cells, indicating that the cells are actively dividing and have less cytoplasm relative to the size of the nucleus.

MCQ #3:
Which layer of the bladder wall is responsible for its contractile function?
A) Mucosa
B) Submucosa
C) Muscularis propria
D) Adventitia
E) Serosa

Correct Answer: C) Muscularis propria
Rationale: The muscularis propria, composed of smooth muscle, is responsible for the contraction of the bladder during micturition.

3.3. Scenario (Histology of the Lower Urinary System):

In a histology laboratory session, first-year medical students are examining slides from the lower urinary system, including the ureter, urinary bladder, and urethra. They are tasked with identifying the histological features of each structure and understanding their clinical relevance, such as how these features protect against infection or allow for functional changes during urine storage and elimination.

MCQ #1:

Which of the following histological features is characteristic of the ureter?
A) A thick layer of skeletal muscle
B) Presence of goblet cells in the epithelium
C) A star-shaped lumen in cross-section
D) Stratified squamous epithelium
E) Numerous blood vessels in the submucosa

Correct Answer: C
Rationale: The ureter has a star-shaped lumen in cross-section due to the folding of the mucosa, which allows for expansion as urine passes through.

MCQ #2:

In the urinary bladder, the superficial layer of the transitional epithelium consists of:
A) Ciliated columnar cells
B) Umbrella cells
C) Basal cells
D) Goblet cells
E) Squamous cells

Correct Answer: B
Rationale: The transitional epithelium of the bladder features umbrella cells on the surface, which are large cells that can stretch and provide a protective barrier against urine.

MCQ #3:

Which of the following statements accurately describes the muscular layer of the urinary bladder?
A) It consists of striated muscle under voluntary control.
B) It is composed of three layers of smooth muscle collectively known as the detrusor muscle.
C) It contains both smooth and skeletal muscle fibers.
D) It is innervated solely by the somatic nervous system.
E) It contracts to prevent urine leakage between micturitions.

Correct Answer: B
Rationale: The muscular layer of the bladder, known as the detrusor muscle, is composed of three layers of smooth muscle that contract to expel urine during micturition.
